# Supplementary material for: Integrated multi-omics analysis to investigate the pathogenesis of intrauterine adhesion
Source: Research Square preprint supplement (doi:10.21203/rs.3.rs-7079007/v1), 2025-08-08
Supplement: Supplementary file 1 [file 0048d3b1f764f1f0b8585000.xlsx]

## Sheet: 06.cirrna
mRNA	miRNA	CirRNA
HTR2C	hsa-miR-335-3p	hsa_circ_0093663
HTR2C	hsa-miR-342-3p	hsa_circ_0106680
HTR2C	hsa-miR-3662	hsa_circ_0102290
IL1A	hsa-miR-3662	hsa_circ_0102290
HTR2C	hsa-miR-3662	hsa_circ_0127327
IL1A	hsa-miR-3662	hsa_circ_0127327
HTR2C	hsa-miR-4476	hsa_circ_0024265
HTR2C	hsa-miR-4476	hsa_circ_0101639
CX3CL1	hsa-miR-4498	hsa_circ_0069071
CX3CL1	hsa-miR-4498	hsa_circ_0013869
CX3CL1	hsa-miR-4498	hsa_circ_0013871
CX3CL1	hsa-miR-4498	hsa_circ_0013876
CX3CL1	hsa-miR-4498	hsa_circ_0013870
CX3CL1	hsa-miR-4498	hsa_circ_0013874
CX3CL1	hsa-miR-4498	hsa_circ_0013873
HTR2C	hsa-miR-4533	hsa_circ_0013870
HTR2C	hsa-miR-4533	hsa_circ_0013871
HTR2C	hsa-miR-4719	hsa_circ_0041122
SIX1	hsa-miR-4775	hsa_circ_0139065
SIX1	hsa-miR-4775	hsa_circ_0043315
SIX1	hsa-miR-4775	hsa_circ_0139066
SIX1	hsa-miR-4775	hsa_circ_0005503
