# Supplementary material for: Integrated multi-omics analysis to investigate the pathogenesis of intrauterine adhesion
Source: Research Square preprint supplement (doi:10.21203/rs.3.rs-7079007/v1), 2025-08-08
Supplement: Supplementary file 2 [file 1d2f68396b65c5b49de237f8.xlsx]

## Sheet: melt_p_r
X1	X2	cor	pvalue
FAT2	k__Bacteria.p__Proteobacteria.c__Alphaproteobacteria.o__Acetobacterales.f__Acetobacteraceae.g__Acidisoma	-0.437445	0.154989949939987
TMEM189.UBE2V1	k__Bacteria.p__Proteobacteria.c__Alphaproteobacteria.o__Acetobacterales.f__Acetobacteraceae.g__Acidisoma	0.264547008605118	0.406015905684443
CTD.2545G14.7	k__Bacteria.p__Proteobacteria.c__Alphaproteobacteria.o__Acetobacterales.f__Acetobacteraceae.g__Acidisoma	0.0717266367156594	0.824690460445298
SULT1E1	k__Bacteria.p__Proteobacteria.c__Alphaproteobacteria.o__Acetobacterales.f__Acetobacteraceae.g__Acidisoma	0.568286166633216	0.053878144824145
CX3CL1	k__Bacteria.p__Proteobacteria.c__Alphaproteobacteria.o__Acetobacterales.f__Acetobacteraceae.g__Acidisoma	-0.683017	0.0143587241271945
VNN1	k__Bacteria.p__Proteobacteria.c__Alphaproteobacteria.o__Acetobacterales.f__Acetobacteraceae.g__Acidisoma	0.444147359048486	0.148039586975241
ZNF600	k__Bacteria.p__Proteobacteria.c__Alphaproteobacteria.o__Acetobacterales.f__Acetobacteraceae.g__Acidisoma	0.862168402858826	0.000309405357047847
COL8A1	k__Bacteria.p__Proteobacteria.c__Alphaproteobacteria.o__Acetobacterales.f__Acetobacteraceae.g__Acidisoma	-0.388162	0.212448537206148
SIX1	k__Bacteria.p__Proteobacteria.c__Alphaproteobacteria.o__Acetobacterales.f__Acetobacteraceae.g__Acidisoma	-0.589708	0.0435783123901031
ZBTB16	k__Bacteria.p__Proteobacteria.c__Alphaproteobacteria.o__Acetobacterales.f__Acetobacteraceae.g__Acidisoma	0.347106759592515	0.268969366761864
PEBP4	k__Bacteria.p__Proteobacteria.c__Alphaproteobacteria.o__Acetobacterales.f__Acetobacteraceae.g__Acidisoma	0.358303751837434	0.252772912988359
LRP4	k__Bacteria.p__Proteobacteria.c__Alphaproteobacteria.o__Acetobacterales.f__Acetobacteraceae.g__Acidisoma	0.821112764627454	0.00105943104315404
LHFPL3	k__Bacteria.p__Proteobacteria.c__Alphaproteobacteria.o__Acetobacterales.f__Acetobacteraceae.g__Acidisoma	0.4516120205451	0.140537525793845
DUSP2	k__Bacteria.p__Proteobacteria.c__Alphaproteobacteria.o__Acetobacterales.f__Acetobacteraceae.g__Acidisoma	-0.712875	0.00926088997252137
PLA2G4E	k__Bacteria.p__Proteobacteria.c__Alphaproteobacteria.o__Acetobacterales.f__Acetobacteraceae.g__Acidisoma	0.287389467619609	0.365071737909937
ORMDL3	k__Bacteria.p__Proteobacteria.c__Alphaproteobacteria.o__Acetobacterales.f__Acetobacteraceae.g__Acidisoma	0.518793974014619	0.0839445199643004
CYP26A1	k__Bacteria.p__Proteobacteria.c__Alphaproteobacteria.o__Acetobacterales.f__Acetobacteraceae.g__Acidisoma	0.403091720817114	0.193851549395409
XDH	k__Bacteria.p__Proteobacteria.c__Alphaproteobacteria.o__Acetobacterales.f__Acetobacteraceae.g__Acidisoma	0.18661653741533	0.561416012951036
GPX3	k__Bacteria.p__Proteobacteria.c__Alphaproteobacteria.o__Acetobacterales.f__Acetobacteraceae.g__Acidisoma	-0.358304	0.252772912988359
CD36	k__Bacteria.p__Proteobacteria.c__Alphaproteobacteria.o__Acetobacterales.f__Acetobacteraceae.g__Acidisoma	0.362036082585741	0.247504112604962
MUC15	k__Bacteria.p__Proteobacteria.c__Alphaproteobacteria.o__Acetobacterales.f__Acetobacteraceae.g__Acidisoma	0.701678180681642	0.0109804947553834
IL1A	k__Bacteria.p__Proteobacteria.c__Alphaproteobacteria.o__Acetobacterales.f__Acetobacteraceae.g__Acidisoma	-0.793087	0.00208561851468109
POF1B	k__Bacteria.p__Proteobacteria.c__Alphaproteobacteria.o__Acetobacterales.f__Acetobacteraceae.g__Acidisoma	-0.709143	0.00980998568816758
HLA.DOB	k__Bacteria.p__Proteobacteria.c__Alphaproteobacteria.o__Acetobacterales.f__Acetobacteraceae.g__Acidisoma	0.313515782857755	0.32103841437706
B3GAT1	k__Bacteria.p__Proteobacteria.c__Alphaproteobacteria.o__Acetobacterales.f__Acetobacteraceae.g__Acidisoma	-0.44788	0.144257182143131
MUC5B	k__Bacteria.p__Proteobacteria.c__Alphaproteobacteria.o__Acetobacterales.f__Acetobacteraceae.g__Acidisoma	-0.65689	0.0203015540707249
CYP24A1	k__Bacteria.p__Proteobacteria.c__Alphaproteobacteria.o__Acetobacterales.f__Acetobacteraceae.g__Acidisoma	-0.376965	0.227080799992594
CLDN8	k__Bacteria.p__Proteobacteria.c__Alphaproteobacteria.o__Acetobacterales.f__Acetobacteraceae.g__Acidisoma	0.432950366803567	0.159765804068651
ICAM4	k__Bacteria.p__Proteobacteria.c__Alphaproteobacteria.o__Acetobacterales.f__Acetobacteraceae.g__Acidisoma	-0.753931	0.00461960011047315
HIF3A	k__Bacteria.p__Proteobacteria.c__Alphaproteobacteria.o__Acetobacterales.f__Acetobacteraceae.g__Acidisoma	0.3956270593205	0.203019829327252
FZD9	k__Bacteria.p__Proteobacteria.c__Alphaproteobacteria.o__Acetobacterales.f__Acetobacteraceae.g__Acidisoma	0.511329312518005	0.0892974413836754
SLC5A9	k__Bacteria.p__Proteobacteria.c__Alphaproteobacteria.o__Acetobacterales.f__Acetobacteraceae.g__Acidisoma	0.250066160136543	0.433110270146378
PHACTR3	k__Bacteria.p__Proteobacteria.c__Alphaproteobacteria.o__Acetobacterales.f__Acetobacteraceae.g__Acidisoma	0.706646990050099	0.0101904637031848
HPCAL4	k__Bacteria.p__Proteobacteria.c__Alphaproteobacteria.o__Acetobacterales.f__Acetobacteraceae.g__Acidisoma	0.225522478334859	0.480958268291902
ANGPTL1	k__Bacteria.p__Proteobacteria.c__Alphaproteobacteria.o__Acetobacterales.f__Acetobacteraceae.g__Acidisoma	0.548652620001071	0.0647142974043996
SHH	k__Bacteria.p__Proteobacteria.c__Alphaproteobacteria.o__Acetobacterales.f__Acetobacteraceae.g__Acidisoma	-0.391895	0.207701596776242
DUOX1	k__Bacteria.p__Proteobacteria.c__Alphaproteobacteria.o__Acetobacterales.f__Acetobacteraceae.g__Acidisoma	0.369500744082354	0.237161988448497
HTR2C	k__Bacteria.p__Proteobacteria.c__Alphaproteobacteria.o__Acetobacterales.f__Acetobacteraceae.g__Acidisoma	-0.583199	0.0465461457373222
SLC6A14	k__Bacteria.p__Proteobacteria.c__Alphaproteobacteria.o__Acetobacterales.f__Acetobacteraceae.g__Acidisoma	-0.334525	0.287864052545535
DGKG	k__Bacteria.p__Proteobacteria.c__Alphaproteobacteria.o__Acetobacterales.f__Acetobacteraceae.g__Acidisoma	0.515061643266312	0.0865929699622364
HSD17B2	k__Bacteria.p__Proteobacteria.c__Alphaproteobacteria.o__Acetobacterales.f__Acetobacteraceae.g__Acidisoma	0.235136837143316	0.461933625549468
SLPI	k__Bacteria.p__Proteobacteria.c__Alphaproteobacteria.o__Acetobacterales.f__Acetobacteraceae.g__Acidisoma	-0.500132	0.0977516186345208
LAMB3	k__Bacteria.p__Proteobacteria.c__Alphaproteobacteria.o__Acetobacterales.f__Acetobacteraceae.g__Acidisoma	-0.571047	0.0524638754069336
STEAP4	k__Bacteria.p__Proteobacteria.c__Alphaproteobacteria.o__Acetobacterales.f__Acetobacteraceae.g__Acidisoma	0.339642098095901	0.280090994826263
FKBP5	k__Bacteria.p__Proteobacteria.c__Alphaproteobacteria.o__Acetobacterales.f__Acetobacteraceae.g__Acidisoma	0.548652620001071	0.0647142974043996
NOV	k__Bacteria.p__Proteobacteria.c__Alphaproteobacteria.o__Acetobacterales.f__Acetobacteraceae.g__Acidisoma	0.410556382313727	0.184943024244764
FAT2	k__Bacteria.p__Firmicutes.c__Clostridia.o__Clostridiales.f__Clostridiaceae.g__Clostridium_sensu_stricto_1	-0.475248	0.118420573267255
TMEM189.UBE2V1	k__Bacteria.p__Firmicutes.c__Clostridia.o__Clostridiales.f__Clostridiaceae.g__Clostridium_sensu_stricto_1	0.404112227128795	0.192618339559098
CTD.2545G14.7	k__Bacteria.p__Firmicutes.c__Clostridia.o__Clostridiales.f__Clostridiaceae.g__Clostridium_sensu_stricto_1	0.316618895128631	0.316011736912332
SULT1E1	k__Bacteria.p__Firmicutes.c__Clostridia.o__Clostridiales.f__Clostridiaceae.g__Clostridium_sensu_stricto_1	0.464182963593886	0.128467194449551
CX3CL1	k__Bacteria.p__Firmicutes.c__Clostridia.o__Clostridiales.f__Clostridiaceae.g__Clostridium_sensu_stricto_1	-0.703118	0.0107470975268861
VNN1	k__Bacteria.p__Firmicutes.c__Clostridia.o__Clostridiales.f__Clostridiaceae.g__Clostridium_sensu_stricto_1	0.416045949986505	0.178556865079958
ZNF600	k__Bacteria.p__Firmicutes.c__Clostridia.o__Clostridiales.f__Clostridiaceae.g__Clostridium_sensu_stricto_1	0.703117655477193	0.0107470975268861
COL8A1	k__Bacteria.p__Firmicutes.c__Clostridia.o__Clostridiales.f__Clostridiaceae.g__Clostridium_sensu_stricto_1	-0.307874	0.33028895903307
SIX1	k__Bacteria.p__Firmicutes.c__Clostridia.o__Clostridiales.f__Clostridiaceae.g__Clostridium_sensu_stricto_1	-0.561662	0.057380302502002
ZBTB16	k__Bacteria.p__Firmicutes.c__Clostridia.o__Clostridiales.f__Clostridiaceae.g__Clostridium_sensu_stricto_1	0.141455622995412	0.661008408217414
PEBP4	k__Bacteria.p__Firmicutes.c__Clostridia.o__Clostridiales.f__Clostridiaceae.g__Clostridium_sensu_stricto_1	0.257948488991633	0.418254743788554
LRP4	k__Bacteria.p__Firmicutes.c__Clostridia.o__Clostridiales.f__Clostridiaceae.g__Clostridium_sensu_stricto_1	0.715599033976788	0.00887487516766591
LHFPL3	k__Bacteria.p__Firmicutes.c__Clostridia.o__Clostridiales.f__Clostridiaceae.g__Clostridium_sensu_stricto_1	0.270429867491228	0.395258189665247
DUSP2	k__Bacteria.p__Firmicutes.c__Clostridia.o__Clostridiales.f__Clostridiaceae.g__Clostridium_sensu_stricto_1	-0.582464	0.0468899740196575
PLA2G4E	k__Bacteria.p__Firmicutes.c__Clostridia.o__Clostridiales.f__Clostridiaceae.g__Clostridium_sensu_stricto_1	0.490934220984075	0.105085410445124
ORMDL3	k__Bacteria.p__Firmicutes.c__Clostridia.o__Clostridiales.f__Clostridiaceae.g__Clostridium_sensu_stricto_1	0.199702055993522	0.533758273790576
CYP26A1	k__Bacteria.p__Firmicutes.c__Clostridia.o__Clostridiales.f__Clostridiaceae.g__Clostridium_sensu_stricto_1	0.495094680483941	0.101724295860713
XDH	k__Bacteria.p__Firmicutes.c__Clostridia.o__Clostridiales.f__Clostridiaceae.g__Clostridium_sensu_stricto_1	0.170578839494467	0.596081537678011
GPX3	k__Bacteria.p__Firmicutes.c__Clostridia.o__Clostridiales.f__Clostridiaceae.g__Clostridium_sensu_stricto_1	-0.411885	0.18338400865381
CD36	k__Bacteria.p__Firmicutes.c__Clostridia.o__Clostridiales.f__Clostridiaceae.g__Clostridium_sensu_stricto_1	0.216343893992982	0.499448136978349
MUC15	k__Bacteria.p__Firmicutes.c__Clostridia.o__Clostridiales.f__Clostridiaceae.g__Clostridium_sensu_stricto_1	0.515896977983266	0.085995369906409
IL1A	k__Bacteria.p__Firmicutes.c__Clostridia.o__Clostridiales.f__Clostridiaceae.g__Clostridium_sensu_stricto_1	-0.565631	0.055263218361553
POF1B	k__Bacteria.p__Firmicutes.c__Clostridia.o__Clostridiales.f__Clostridiaceae.g__Clostridium_sensu_stricto_1	-0.569983	0.053005704133452
HLA.DOB	k__Bacteria.p__Firmicutes.c__Clostridia.o__Clostridiales.f__Clostridiaceae.g__Clostridium_sensu_stricto_1	0.195541596493657	0.542488693974982
B3GAT1	k__Bacteria.p__Firmicutes.c__Clostridia.o__Clostridiales.f__Clostridiaceae.g__Clostridium_sensu_stricto_1	-0.320355	0.310017097347222
MUC5B	k__Bacteria.p__Firmicutes.c__Clostridia.o__Clostridiales.f__Clostridiaceae.g__Clostridium_sensu_stricto_1	-0.470132	0.122998942120402
CYP24A1	k__Bacteria.p__Firmicutes.c__Clostridia.o__Clostridiales.f__Clostridiaceae.g__Clostridium_sensu_stricto_1	-0.490934	0.105085410445124
CLDN8	k__Bacteria.p__Firmicutes.c__Clostridia.o__Clostridiales.f__Clostridiaceae.g__Clostridium_sensu_stricto_1	0.245467110492038	0.441894638593307
ICAM4	k__Bacteria.p__Firmicutes.c__Clostridia.o__Clostridiales.f__Clostridiaceae.g__Clostridium_sensu_stricto_1	-0.719759	0.00830862408269209
HIF3A	k__Bacteria.p__Firmicutes.c__Clostridia.o__Clostridiales.f__Clostridiaceae.g__Clostridium_sensu_stricto_1	0.133134703995681	0.679984402489108
FZD9	k__Bacteria.p__Firmicutes.c__Clostridia.o__Clostridiales.f__Clostridiaceae.g__Clostridium_sensu_stricto_1	0.657352600978677	0.0201829533491291
SLC5A9	k__Bacteria.p__Firmicutes.c__Clostridia.o__Clostridiales.f__Clostridiaceae.g__Clostridium_sensu_stricto_1	0.245467110492038	0.441894638593307
PHACTR3	k__Bacteria.p__Firmicutes.c__Clostridia.o__Clostridiales.f__Clostridiaceae.g__Clostridium_sensu_stricto_1	0.60432406322181	0.03740635828643
HPCAL4	k__Bacteria.p__Firmicutes.c__Clostridia.o__Clostridiales.f__Clostridiaceae.g__Clostridium_sensu_stricto_1	0.0544682112824183	0.866485957839998
ANGPTL1	k__Bacteria.p__Firmicutes.c__Clostridia.o__Clostridiales.f__Clostridiaceae.g__Clostridium_sensu_stricto_1	0.295392624490418	0.351261058349736
SHH	k__Bacteria.p__Firmicutes.c__Clostridia.o__Clostridiales.f__Clostridiaceae.g__Clostridium_sensu_stricto_1	-0.536699	0.0720026459580007
DUOX1	k__Bacteria.p__Firmicutes.c__Clostridia.o__Clostridiales.f__Clostridiaceae.g__Clostridium_sensu_stricto_1	0.133134703995681	0.679984402489108
HTR2C	k__Bacteria.p__Firmicutes.c__Clostridia.o__Clostridiales.f__Clostridiaceae.g__Clostridium_sensu_stricto_1	-0.465868	0.12690293992774
SLC6A14	k__Bacteria.p__Firmicutes.c__Clostridia.o__Clostridiales.f__Clostridiaceae.g__Clostridium_sensu_stricto_1	-0.280721	0.37679343723029
DGKG	k__Bacteria.p__Firmicutes.c__Clostridia.o__Clostridiales.f__Clostridiaceae.g__Clostridium_sensu_stricto_1	0.457650544985155	0.134651695388669
HSD17B2	k__Bacteria.p__Firmicutes.c__Clostridia.o__Clostridiales.f__Clostridiaceae.g__Clostridium_sensu_stricto_1	0.166418379994602	0.605205941018228
SLPI	k__Bacteria.p__Firmicutes.c__Clostridia.o__Clostridiales.f__Clostridiaceae.g__Clostridium_sensu_stricto_1	-0.237146	0.458002824045137
LAMB3	k__Bacteria.p__Firmicutes.c__Clostridia.o__Clostridiales.f__Clostridiaceae.g__Clostridium_sensu_stricto_1	-0.416046	0.178556865079958
STEAP4	k__Bacteria.p__Firmicutes.c__Clostridia.o__Clostridiales.f__Clostridiaceae.g__Clostridium_sensu_stricto_1	0.232985731992443	0.466159190301795
FKBP5	k__Bacteria.p__Firmicutes.c__Clostridia.o__Clostridiales.f__Clostridiaceae.g__Clostridium_sensu_stricto_1	0.532538815982726	0.0746663352051277
NOV	k__Bacteria.p__Firmicutes.c__Clostridia.o__Clostridiales.f__Clostridiaceae.g__Clostridium_sensu_stricto_1	0.4285273284861	0.164555525206823
FAT2	k__Bacteria.p__Bacteroidota.c__Bacteroidia.o__Chitinophagales.f__Chitinophagaceae.g__Puia	-0.185503	0.563795220581417
TMEM189.UBE2V1	k__Bacteria.p__Bacteroidota.c__Bacteroidia.o__Chitinophagales.f__Chitinophagaceae.g__Puia	0.46637065225904	0.126438197152267
CTD.2545G14.7	k__Bacteria.p__Bacteroidota.c__Bacteroidia.o__Chitinophagales.f__Chitinophagaceae.g__Puia	0.150497837873583	0.640593524687232
SULT1E1	k__Bacteria.p__Bacteroidota.c__Bacteroidia.o__Chitinophagales.f__Chitinophagaceae.g__Puia	0.761421473075984	0.00401272959346171
CX3CL1	k__Bacteria.p__Bacteroidota.c__Bacteroidia.o__Chitinophagales.f__Chitinophagaceae.g__Puia	-0.304548	0.33580990099826
VNN1	k__Bacteria.p__Bacteroidota.c__Bacteroidia.o__Chitinophagales.f__Chitinophagaceae.g__Puia	0.696109232459556	0.0119190491084001
ZNF600	k__Bacteria.p__Bacteroidota.c__Bacteroidia.o__Chitinophagales.f__Chitinophagaceae.g__Puia	0.623597854078352	0.0302549487275087
COL8A1	k__Bacteria.p__Bacteroidota.c__Bacteroidia.o__Chitinophagales.f__Chitinophagaceae.g__Puia	0.00725113783812037	0.982156653918725
SIX1	k__Bacteria.p__Bacteroidota.c__Bacteroidia.o__Chitinophagales.f__Chitinophagaceae.g__Puia	-0.688858	0.0132286641980361
ZBTB16	k__Bacteria.p__Bacteroidota.c__Bacteroidia.o__Chitinophagales.f__Chitinophagaceae.g__Puia	0.3915614432585	0.208122832684646
PEBP4	k__Bacteria.p__Bacteroidota.c__Bacteroidia.o__Chitinophagales.f__Chitinophagaceae.g__Puia	0.761369473002639	0.00401672211039669
LRP4	k__Bacteria.p__Bacteroidota.c__Bacteroidia.o__Chitinophagales.f__Chitinophagaceae.g__Puia	0.703360370297676	0.0107081099203516
LHFPL3	k__Bacteria.p__Bacteroidota.c__Bacteroidia.o__Chitinophagales.f__Chitinophagaceae.g__Puia	0.413314856772861	0.181716544611977
DUSP2	k__Bacteria.p__Bacteroidota.c__Bacteroidia.o__Chitinophagales.f__Chitinophagaceae.g__Puia	-0.6381	0.0255651095644083
PLA2G4E	k__Bacteria.p__Bacteroidota.c__Bacteroidia.o__Chitinophagales.f__Chitinophagaceae.g__Puia	0.594593302725871	0.0414407620935431
ORMDL3	k__Bacteria.p__Bacteroidota.c__Bacteroidia.o__Chitinophagales.f__Chitinophagaceae.g__Puia	0.507579648668426	0.0920713572762758
CYP26A1	k__Bacteria.p__Bacteroidota.c__Bacteroidia.o__Chitinophagales.f__Chitinophagaceae.g__Puia	0.130520481086167	0.685982138201444
XDH	k__Bacteria.p__Bacteroidota.c__Bacteroidia.o__Chitinophagales.f__Chitinophagaceae.g__Puia	0.558337613535269	0.0591963616643501
GPX3	k__Bacteria.p__Bacteroidota.c__Bacteroidia.o__Chitinophagales.f__Chitinophagaceae.g__Puia	-0.413315	0.181716544611977
CD36	k__Bacteria.p__Bacteroidota.c__Bacteroidia.o__Chitinophagales.f__Chitinophagaceae.g__Puia	0.761369473002639	0.00401672211039669
MUC15	k__Bacteria.p__Bacteroidota.c__Bacteroidia.o__Chitinophagales.f__Chitinophagaceae.g__Puia	0.920894505441287	2.13376862271282e-05
IL1A	k__Bacteria.p__Bacteroidota.c__Bacteroidia.o__Chitinophagales.f__Chitinophagaceae.g__Puia	-0.708331	0.00993253776867388
POF1B	k__Bacteria.p__Bacteroidota.c__Bacteroidia.o__Chitinophagales.f__Chitinophagaceae.g__Puia	-0.768621	0.00348836716603999
HLA.DOB	k__Bacteria.p__Bacteroidota.c__Bacteroidia.o__Chitinophagales.f__Chitinophagaceae.g__Puia	0.514830786506547	0.0867586200389549
B3GAT1	k__Bacteria.p__Bacteroidota.c__Bacteroidia.o__Chitinophagales.f__Chitinophagaceae.g__Puia	-0.514831	0.0867586200389549
MUC5B	k__Bacteria.p__Bacteroidota.c__Bacteroidia.o__Chitinophagales.f__Chitinophagaceae.g__Puia	-0.688858	0.0132286641980361
CYP24A1	k__Bacteria.p__Bacteroidota.c__Bacteroidia.o__Chitinophagales.f__Chitinophagaceae.g__Puia	-0.181278	0.572862847498052
CLDN8	k__Bacteria.p__Bacteroidota.c__Bacteroidia.o__Chitinophagales.f__Chitinophagaceae.g__Puia	0.355305754067898	0.257052210041416
ICAM4	k__Bacteria.p__Bacteroidota.c__Bacteroidia.o__Chitinophagales.f__Chitinophagaceae.g__Puia	-0.478575	0.115503490900424
HIF3A	k__Bacteria.p__Bacteroidota.c__Bacteroidia.o__Chitinophagales.f__Chitinophagaceae.g__Puia	0.485826235154065	0.109312091500227
FZD9	k__Bacteria.p__Bacteroidota.c__Bacteroidia.o__Chitinophagales.f__Chitinophagaceae.g__Puia	0.500328510830306	0.097599041363201
SLC5A9	k__Bacteria.p__Bacteroidota.c__Bacteroidia.o__Chitinophagales.f__Chitinophagaceae.g__Puia	0.529333062182787	0.0767642616992685
PHACTR3	k__Bacteria.p__Bacteroidota.c__Bacteroidia.o__Chitinophagales.f__Chitinophagaceae.g__Puia	0.75907211527659	0.00419613635894048
HPCAL4	k__Bacteria.p__Bacteroidota.c__Bacteroidia.o__Chitinophagales.f__Chitinophagaceae.g__Puia	0.489259678829148	0.106458837791515
ANGPTL1	k__Bacteria.p__Bacteroidota.c__Bacteroidia.o__Chitinophagales.f__Chitinophagaceae.g__Puia	0.551086475697148	0.0632954635695529
SHH	k__Bacteria.p__Bacteroidota.c__Bacteroidia.o__Chitinophagales.f__Chitinophagaceae.g__Puia	-0.442319	0.149915032309139
DUOX1	k__Bacteria.p__Bacteroidota.c__Bacteroidia.o__Chitinophagales.f__Chitinophagaceae.g__Puia	0.609095578402111	0.0355340726385335
HTR2C	k__Bacteria.p__Bacteroidota.c__Bacteroidia.o__Chitinophagales.f__Chitinophagaceae.g__Puia	-0.760277	0.00410129811624676
SLC6A14	k__Bacteria.p__Bacteroidota.c__Bacteroidia.o__Chitinophagales.f__Chitinophagaceae.g__Puia	-0.518469	0.0841727569559746
DGKG	k__Bacteria.p__Bacteroidota.c__Bacteroidia.o__Chitinophagales.f__Chitinophagaceae.g__Puia	0.920894505441287	2.13376862271282e-05
HSD17B2	k__Bacteria.p__Bacteroidota.c__Bacteroidia.o__Chitinophagales.f__Chitinophagaceae.g__Puia	0.536584200020908	0.0720754308866106
SLPI	k__Bacteria.p__Bacteroidota.c__Bacteroidia.o__Chitinophagales.f__Chitinophagaceae.g__Puia	-0.31905	0.312104065124924
LAMB3	k__Bacteria.p__Bacteroidota.c__Bacteroidia.o__Chitinophagales.f__Chitinophagaceae.g__Puia	-0.587342	0.0446411931130686
STEAP4	k__Bacteria.p__Bacteroidota.c__Bacteroidia.o__Chitinophagales.f__Chitinophagaceae.g__Puia	0.761369473002639	0.00401672211039669
FKBP5	k__Bacteria.p__Bacteroidota.c__Bacteroidia.o__Chitinophagales.f__Chitinophagaceae.g__Puia	0.746867197326399	0.00525313759248794
NOV	k__Bacteria.p__Bacteroidota.c__Bacteroidia.o__Chitinophagales.f__Chitinophagaceae.g__Puia	0.848383127060084	0.000486369162343751
FAT2	k__Bacteria.p__Firmicutes.c__Bacilli.o__Exiguobacterales.f__Exiguobacteraceae.g__Exiguobacterium	-0.475248	0.118420573267255
TMEM189.UBE2V1	k__Bacteria.p__Firmicutes.c__Bacilli.o__Exiguobacterales.f__Exiguobacteraceae.g__Exiguobacterium	0.305814658367737	0.333701264566564
CTD.2545G14.7	k__Bacteria.p__Firmicutes.c__Bacilli.o__Exiguobacterales.f__Exiguobacteraceae.g__Exiguobacterium	0.316618895128631	0.316011736912332
SULT1E1	k__Bacteria.p__Firmicutes.c__Bacilli.o__Exiguobacterales.f__Exiguobacteraceae.g__Exiguobacterium	0.677161029242845	0.0155614029550565
CX3CL1	k__Bacteria.p__Firmicutes.c__Bacilli.o__Exiguobacterales.f__Exiguobacteraceae.g__Exiguobacterium	-0.499255	0.0984357565840528
VNN1	k__Bacteria.p__Firmicutes.c__Bacilli.o__Exiguobacterales.f__Exiguobacteraceae.g__Exiguobacterium	0.640710762979217	0.0247804634160256
ZNF600	k__Bacteria.p__Firmicutes.c__Bacilli.o__Exiguobacterales.f__Exiguobacteraceae.g__Exiguobacterium	0.636550303479352	0.0260393457235245
COL8A1	k__Bacteria.p__Firmicutes.c__Bacilli.o__Exiguobacterales.f__Exiguobacteraceae.g__Exiguobacterium	-0.232986	0.466159190301795
SIX1	k__Bacteria.p__Firmicutes.c__Bacilli.o__Exiguobacterales.f__Exiguobacteraceae.g__Exiguobacterium	-0.753043	0.00469586236779544
ZBTB16	k__Bacteria.p__Firmicutes.c__Bacilli.o__Exiguobacterales.f__Exiguobacteraceae.g__Exiguobacterium	0.266269407991363	0.402851143589595
PEBP4	k__Bacteria.p__Firmicutes.c__Bacilli.o__Exiguobacterales.f__Exiguobacteraceae.g__Exiguobacterium	0.594945708480702	0.041289495227886
LRP4	k__Bacteria.p__Firmicutes.c__Bacilli.o__Exiguobacterales.f__Exiguobacteraceae.g__Exiguobacterium	0.765524547975168	0.00370706068873267
LHFPL3	k__Bacteria.p__Firmicutes.c__Bacilli.o__Exiguobacterales.f__Exiguobacteraceae.g__Exiguobacterium	0.345318138488799	0.271610679555476
DUSP2	k__Bacteria.p__Firmicutes.c__Bacilli.o__Exiguobacterales.f__Exiguobacteraceae.g__Exiguobacterium	-0.611588	0.0345833472824411
PLA2G4E	k__Bacteria.p__Firmicutes.c__Bacilli.o__Exiguobacterales.f__Exiguobacteraceae.g__Exiguobacterium	0.673994438978137	0.0162418654193722
ORMDL3	k__Bacteria.p__Firmicutes.c__Bacilli.o__Exiguobacterales.f__Exiguobacteraceae.g__Exiguobacterium	0.303713543490148	0.33720238349466
CYP26A1	k__Bacteria.p__Firmicutes.c__Bacilli.o__Exiguobacterales.f__Exiguobacteraceae.g__Exiguobacterium	0.120653325496086	0.708767837259859
XDH	k__Bacteria.p__Firmicutes.c__Bacilli.o__Exiguobacterales.f__Exiguobacteraceae.g__Exiguobacterium	0.47013192348475	0.122998942120402
GPX3	k__Bacteria.p__Firmicutes.c__Bacilli.o__Exiguobacterales.f__Exiguobacteraceae.g__Exiguobacterium	-0.657353	0.0201829533491291
CD36	k__Bacteria.p__Firmicutes.c__Bacilli.o__Exiguobacterales.f__Exiguobacteraceae.g__Exiguobacterium	0.540859734982456	0.0694049580095314
MUC15	k__Bacteria.p__Firmicutes.c__Bacilli.o__Exiguobacterales.f__Exiguobacteraceae.g__Exiguobacterium	0.728080412476383	0.00725763452769296
IL1A	k__Bacteria.p__Firmicutes.c__Bacilli.o__Exiguobacterales.f__Exiguobacteraceae.g__Exiguobacterium	-0.716466	0.00875450599786649
POF1B	k__Bacteria.p__Firmicutes.c__Bacilli.o__Exiguobacterales.f__Exiguobacteraceae.g__Exiguobacterium	-0.719759	0.00830862408269209
HLA.DOB	k__Bacteria.p__Firmicutes.c__Bacilli.o__Exiguobacterales.f__Exiguobacteraceae.g__Exiguobacterium	0.345318138488799	0.271610679555476
B3GAT1	k__Bacteria.p__Firmicutes.c__Bacilli.o__Exiguobacterales.f__Exiguobacteraceae.g__Exiguobacterium	-0.528378	0.0773967493809582
MUC5B	k__Bacteria.p__Firmicutes.c__Bacilli.o__Exiguobacterales.f__Exiguobacteraceae.g__Exiguobacterium	-0.657353	0.0201829533491291
CYP24A1	k__Bacteria.p__Firmicutes.c__Bacilli.o__Exiguobacterales.f__Exiguobacteraceae.g__Exiguobacterium	-0.266269	0.402851143589595
CLDN8	k__Bacteria.p__Firmicutes.c__Bacilli.o__Exiguobacterales.f__Exiguobacteraceae.g__Exiguobacterium	0.282911245990823	0.372921911653728
ICAM4	k__Bacteria.p__Firmicutes.c__Bacilli.o__Exiguobacterales.f__Exiguobacteraceae.g__Exiguobacterium	-0.582464	0.0468899740196575
HIF3A	k__Bacteria.p__Firmicutes.c__Bacilli.o__Exiguobacterales.f__Exiguobacteraceae.g__Exiguobacterium	0.282911245990823	0.372921911653728
FZD9	k__Bacteria.p__Firmicutes.c__Bacilli.o__Exiguobacterales.f__Exiguobacteraceae.g__Exiguobacterium	0.661513060478542	0.0191384550215697
SLC5A9	k__Bacteria.p__Firmicutes.c__Bacilli.o__Exiguobacterales.f__Exiguobacteraceae.g__Exiguobacterium	0.44516916648556	0.146997817818705
PHACTR3	k__Bacteria.p__Firmicutes.c__Bacilli.o__Exiguobacterales.f__Exiguobacteraceae.g__Exiguobacterium	0.766866397467676	0.00361103755444555
HPCAL4	k__Bacteria.p__Firmicutes.c__Bacilli.o__Exiguobacterales.f__Exiguobacteraceae.g__Exiguobacterium	0.33099913010085	0.293290316710371
ANGPTL1	k__Bacteria.p__Firmicutes.c__Bacilli.o__Exiguobacterales.f__Exiguobacteraceae.g__Exiguobacterium	0.407725030986774	0.188291509259937
SHH	k__Bacteria.p__Firmicutes.c__Bacilli.o__Exiguobacterales.f__Exiguobacteraceae.g__Exiguobacterium	-0.582464	0.0468899740196575
DUOX1	k__Bacteria.p__Firmicutes.c__Bacilli.o__Exiguobacterales.f__Exiguobacteraceae.g__Exiguobacterium	0.282911245990823	0.372921911653728
HTR2C	k__Bacteria.p__Firmicutes.c__Bacilli.o__Exiguobacterales.f__Exiguobacteraceae.g__Exiguobacterium	-0.71786	0.00856375476931853
SLC6A14	k__Bacteria.p__Firmicutes.c__Bacilli.o__Exiguobacterales.f__Exiguobacteraceae.g__Exiguobacterium	-0.578201	0.0489198576457589
DGKG	k__Bacteria.p__Firmicutes.c__Bacilli.o__Exiguobacterales.f__Exiguobacteraceae.g__Exiguobacterium	0.719759493476653	0.00830862408269209
HSD17B2	k__Bacteria.p__Firmicutes.c__Bacilli.o__Exiguobacterales.f__Exiguobacteraceae.g__Exiguobacterium	0.328676300489339	0.296896370648835
SLPI	k__Bacteria.p__Firmicutes.c__Bacilli.o__Exiguobacterales.f__Exiguobacteraceae.g__Exiguobacterium	-0.395244	0.203497765946233
LAMB3	k__Bacteria.p__Firmicutes.c__Bacilli.o__Exiguobacterales.f__Exiguobacteraceae.g__Exiguobacterium	-0.665674	0.0181340571553771
STEAP4	k__Bacteria.p__Firmicutes.c__Bacilli.o__Exiguobacterales.f__Exiguobacteraceae.g__Exiguobacterium	0.532538815982726	0.0746663352051277
FKBP5	k__Bacteria.p__Firmicutes.c__Bacilli.o__Exiguobacterales.f__Exiguobacteraceae.g__Exiguobacterium	0.719759493476653	0.00830862408269209
NOV	k__Bacteria.p__Firmicutes.c__Bacilli.o__Exiguobacterales.f__Exiguobacteraceae.g__Exiguobacterium	0.703117655477193	0.0107470975268861
