# Supplementary material for: Integrated multi-omics analysis to investigate the pathogenesis of intrauterine adhesion
Source: Research Square preprint supplement (doi:10.21203/rs.3.rs-7079007/v1), 2025-08-08
Supplement: Supplementary file 3 [file 2bc60c1fab8a17ee9d4503f5.xlsx]

## Sheet: Sheet1
Table S1 Relationship between sequencing quality scores and base detection accuracy
Quality score	False detection rate of the bases	Inferred base detection accuracy
10 (Q10)	2025-01-10	0.9
20 (Q20)	1/100	0.99
30 (Q30)	1/1000	0.999
