# Supplementary material for: Integrated multi-omics analysis to investigate the pathogenesis of intrauterine adhesion
Source: Research Square preprint supplement (doi:10.21203/rs.3.rs-7079007/v1), 2025-08-08
Supplement: Supplementary file 4 [file 5244ac0e1ad88903ca45f740.xlsx]

## Sheet: Sheet1
Table S3 Long-coding RNA result statistics
	Sample ID	Clean reads	Mapped reads	Mapped Rate(%)
Control	N1	174953310	165070948	95.99
	N2	134518284	126487976	95.76
	N3	113394876	106467038	96.26
	N4	115695066	109122884	96.41
	N5	148134842	138027668	95.88
	N6	133331684	126849730	96.34
IUA	IUA1	128958670	121055648	95.32
	IUA2	210145958	198134668	96.31
	IUA3	123462932	115570680	95.9
	IUA4	114082784	107528464	95.66
	IUA5	129682536	124000662	97.31
	IUA6	114037470	108813522	96.56
