# Supplementary material for: Integrated multi-omics analysis to investigate the pathogenesis of intrauterine adhesion
Source: Research Square preprint supplement (doi:10.21203/rs.3.rs-7079007/v1), 2025-08-08
Supplement: Supplementary file 5 [file 6d7a158de5fe7cafbd627d74.xlsx]

## Sheet: gene-drugs
gene	drug	regulatory approval	indication	interaction score
DUSP2	IMATINIB	Approved	antineoplastic agent	0.08056141752914434
DUSP2	SORAFENIB	Approved	antineoplastic agent	0.05043845271389907
DUSP2	NILOTINIB	Approved	antineoplastic agent	0.3625263788811495
IL1A	HYDROXYCHLOROQUINE	Approved	antirheumatic agent	0.5800422062098392
IL1A	OLANZAPINE	Approved	for treatment of bipolar disorder,antidepressant,antipsychotic agent	0.137378417260225
IL1A	MITOMYCIN	Approved		0.4350316546573794
IL1A	RILONACEPT	Approved	DMARD,antiinflammatory agent	3.480253237259035
CX3CL1	ATEZOLIZUMAB	Approved		0.966737010349732
HTR2C	SERTINDOLE	Approved	antipsychotic agent	0.07311456380796293
HTR2C	METHIXENE HYDROCHLORIDE	Approved		0.09596286499795134
HTR2C	TRAMADOL	Approved	analgesic	0.04798143249897567
HTR2C	AGOMELATINE	Approved	antidepressant	0.143944297496927
HTR2C	CHLORPROTHIXENE	Approved	Antipsychotic Agents	0.1151554379975416
HTR2C	METHYLERGONOVINE	Approved	Abortifacient Agents	0.03489558727198231
HTR2C	MESORIDAZINE	Approved	Antipsychotic Agents	0.03838514599918053
HTR2C	DOXEPIN HYDROCHLORIDE	Approved	hypnotic,antimigraine agent	0.008723896817995578
HTR2C	PROPIOMAZINE	Approved	Hypnotics and Sedatives	0.0548359228559722
HTR2C	LOXAPINE HYDROCHLORIDE	Approved		0.07677029199836106
HTR2C	LORCASERIN HYDROCHLORIDE	Approved		0.3838514599918053
HTR2C	NEFAZODONE	Approved	Second-Generation,Antidepressive Agents	0.0274179614279861
HTR2C	THIORIDAZINE	Approved	Antipsychotic Agents	0.02647251448219347
HTR2C	METHYSERGIDE	Approved	Anti-migraine agents; Vasoconstrictor Agents	0.08081083368248534
HTR2C	ERGOTAMINE	Approved	Anti-migraine Agents	0.03489558727198231
HTR2C	MINAPRINE	Approved	Antidepressive Agents	0.1279504866639351
HTR2C	XANOMELINE	Approved		0.02257949764657678
HTR2C	OLANZAPINE PAMOATE	Approved		0.07677029199836106
HTR2C	CABERGOLINE	Approved	Antiparkinson Agents	0.02399071624948783
HTR2C	TRIMIPRAMINE MALEATE	Approved		0.04798143249897567
HTR2C	DULOXETINE HYDROCHLORIDE	Approved	antidepressant	0.01476351769199251
HTR2C	PROMAZINE	Approved	Antiemetics; Antipsychotic Agents	0.04040541684124267
HTR2C	LOXAPINE SUCCINATE	Approved		0.06397524333196757
HTR2C	METHYSERGIDE MALEATE	Approved		0.06397524333196757
HTR2C	THIETHYLPERAZINE	Approved	Antiemetics	0.06979117454396462
HTR2C	AMISULPRIDE	Approved	antiemetic,antipsychotic agent	0.01476351769199251
HTR2C	CYCLOBENZAPRINE	Approved	Tricyclic,Antidepressive Agents	0.0426501622213117
HTR2C	TRIFLUOPERAZINE HYDROCHLORIDE	Approved		0.03489558727198231
HTR2C	PERGOLIDE	Approved	Antiparkinson Agents	0.02257949764657678
HTR2C	ASENAPINE	Approved	antipsychotic agent	0.01535405839967221
HTR2C	PERPHENAZINE	Approved	Antipsychotic Agents	0.01476351769199251
HTR2C	CARPHENAZINE MALEATE	Approved		0.1279504866639351
HTR2C	APOMORPHINE	Approved	antiparkinson agent,for treatment of erectile dysfunction,for treatment of sexual dysfunction in women	0.01421672074043723
HTR2C	CLOTHIAPINE	Approved		0.0426501622213117
HTR2C	FENFLURAMINE HYDROCHLORIDE	Approved		0.1279504866639351
HTR2C	BROMOCRIPTINE	Approved	antidiabetic	0.01238230516102597
HTR2C	ILOPERIDONE	Approved	atypical,antipsychotic agent	0.03655728190398146
HTR2C	DEXFENFLURAMINE HYDROCHLORIDE	Approved		0.02257949764657678
HTR2C	NEFAZODONE HYDROCHLORIDE	Approved		0.06397524333196757
HTR2C	ARIPIPRAZOLE LAUROXIL	Approved	antipsychotic agent	0.02020270842062133
HTR2C	LOXAPINE	Approved	antipsychotic agent	0.05905407076797006
HTR2C	TRAZODONE	Approved	antidepressant	0.07677029199836108
HTR2C	ZIPRASIDONE	Approved	antipsychotic agent	0.03714691548307793
HTR2C	MINAPRINE HYDROCHLORIDE	Approved		0.0426501622213117
HTR2C	MIRTAZAPINE	Approved	antidepressant	0.07677029199836106
HTR2C	OXYMETAZOLINE HYDROCHLORIDE	Approved	analgesic	0.01919257299959026
HTR2C	CHLORPROMAZINE	Approved		0.0103743637835623
HTR2C	TRIFLUOPERAZINE	Approved	Antiemetics; Antipsychotic Agents	0.01279504866639351
HTR2C	ZIMELDINE HYDROCHLORIDE	Approved		0.02257949764657678
HTR2C	CLOZAPINE	Approved	Antipsychotic Agents	0.01187169463892181
HTR2C	RISPERIDONE	Approved	Antipsychotic Agents,antipsychotic agent	0.01145825253706881
HTR2C	QUETIAPINE FUMARATE	Approved	antidepressant,antipsychotic agent	0.03198762166598378
HTR2C	OLANZAPINE	Approved	for treatment of bipolar disorder,antidepressant,antipsychotic agent	0.02020270842062133
