# Supplementary material for: Integrated multi-omics analysis to investigate the pathogenesis of intrauterine adhesion
Source: Research Square preprint supplement (doi:10.21203/rs.3.rs-7079007/v1), 2025-08-08
Supplement: Supplementary file 6 [file 8e198693e1a594f9bd5b863b.xlsx]

## Sheet: Sheet1
Table S5 Control, Alpha diversity analysis of microbial flora between IUA groups
	Sample ID	Observed	Chao1	Shannon	Simpson	Coverage
Control	n19	486	498.92	3.88	0.94	0.999272
	n15	380	396	2.74	0.79	0.999225
	n27	430	435.12	4.06	0.95	0.99953
	N7	173	176.5	1.3	0.37	0.999836
	n4	250	257	3.32	0.93	0.999648
	n3	401	409.782	2.64	0.71	0.99939
IUA	iua5	850	861.892	4.25	0.94	0.999131
	iua30	471	485.5	3.71	0.91	0.999296
	iua7	447	462.292	2.82	0.82	0.999061
	iua13	518	533.232	2.87	0.77	0.998943
	iua16	501	518.45	3.86	0.95	0.999037
	iua29	508	537.685	3.21	0.86	0.998873
