# Supplementary material for: Integrated multi-omics analysis to investigate the pathogenesis of intrauterine adhesion
Source: Research Square preprint supplement (doi:10.21203/rs.3.rs-7079007/v1), 2025-08-08
Supplement: Supplementary file 7 [file 9dabf7aa1757bd310d8d65db.xlsx]

## Sheet: melt_p_r
X1	X2	cor	pvalue
FAT2	Rocuronium	0.474292382984615	0.119266755536627
TMEM189.UBE2V1	Rocuronium	-0.44059	0.151703801864796
CTD.2545G14.7	Rocuronium	-0.370914	0.23523313348604
SULT1E1	Rocuronium	-0.477305	0.11661096970342
CX3CL1	Rocuronium	0.608391608391608	0.0358059970520293
VNN1	Rocuronium	-0.853147	0.000418117940414996
ZNF600	Rocuronium	-0.615385	0.0331699010901058
COL8A1	Rocuronium	0.503496503496504	0.0951573665941247
SIX1	Rocuronium	0.27972027972028	0.378568669662303
ZBTB16	Rocuronium	-0.195804	0.541935885731317
PEBP4	Rocuronium	-0.321678	0.307909876180653
LRP4	Rocuronium	-0.335664	0.286122902914987
LHFPL3	Rocuronium	-0.27972	0.378568669662303
DUSP2	Rocuronium	0.307692307692308	0.33058925941211
PLA2G4E	Rocuronium	-0.27972	0.378568669662303
ORMDL3	Rocuronium	-0.734266	0.00654349014683787
CYP26A1	Rocuronium	-0.230769	0.470531995381542
XDH	Rocuronium	-0.447552	0.144586301303347
GPX3	Rocuronium	0.377622377622378	0.226206044935027
CD36	Rocuronium	-0.524476	0.0800193759202747
MUC15	Rocuronium	-0.615385	0.0331699010901058
IL1A	Rocuronium	0.316909266841799	0.315543603616405
POF1B	Rocuronium	0.601398601398601	0.0385884529220194
HLA.DOB	Rocuronium	-0.503497	0.0951573665941247
B3GAT1	Rocuronium	0.706293706293706	0.0102451939411279
MUC5B	Rocuronium	0.216783216783217	0.498555985524188
CYP24A1	Rocuronium	0.377622377622378	0.226206044935027
CLDN8	Rocuronium	-0.370629	0.235621003512646
ICAM4	Rocuronium	0.398601398601399	0.199335494617809
HIF3A	Rocuronium	-0.314685	0.319138785503305
FZD9	Rocuronium	-0.27972	0.378568669662303
SLC5A9	Rocuronium	-0.566434	0.0548421197754078
PHACTR3	Rocuronium	-0.18564	0.563504135774586
HPCAL4	Rocuronium	0.0281697126081599	0.930749393226466
ANGPTL1	Rocuronium	-0.328671	0.296904115688764
SHH	Rocuronium	0.153846153846154	0.633090681246262
DUOX1	Rocuronium	-0.405594	0.1908358740045
HTR2C	Rocuronium	0.694060060505525	0.0122789369219159
SLC6A14	Rocuronium	0.584521536619319	0.0459320424968569
DGKG	Rocuronium	-0.545455	0.066611882266889
HSD17B2	Rocuronium	-0.468531	0.124454791188834
SLPI	Rocuronium	-0.0699301	0.829023640531309
LAMB3	Rocuronium	0.244755244755245	0.443261936450183
STEAP4	Rocuronium	-0.230769	0.470531995381542
FKBP5	Rocuronium	-0.468531	0.124454791188834
NOV	Rocuronium	-0.496503	0.100602631832255
FAT2	Pe.18.3.6Z.9Z.12Z..18.1.9Z..	0.607427086980297	0.0361809745346347
TMEM189.UBE2V1	Pe.18.3.6Z.9Z.12Z..18.1.9Z..	-0.275368	0.386340424051356
CTD.2545G14.7	Pe.18.3.6Z.9Z.12Z..18.1.9Z..	-0.0967602	0.764826787814198
SULT1E1	Pe.18.3.6Z.9Z.12Z..18.1.9Z..	-0.302905	0.33855443011568
CX3CL1	Pe.18.3.6Z.9Z.12Z..18.1.9Z..	0.72027972027972	0.00823976871233844
VNN1	Pe.18.3.6Z.9Z.12Z..18.1.9Z..	-0.230769	0.470531995381542
ZNF600	Pe.18.3.6Z.9Z.12Z..18.1.9Z..	-0.664336	0.0184527180284454
COL8A1	Pe.18.3.6Z.9Z.12Z..18.1.9Z..	0.34965034965035	0.26523878689279
SIX1	Pe.18.3.6Z.9Z.12Z..18.1.9Z..	0.237762237762238	0.456800852639923
ZBTB16	Pe.18.3.6Z.9Z.12Z..18.1.9Z..	-0.195804	0.541935885731317
PEBP4	Pe.18.3.6Z.9Z.12Z..18.1.9Z..	-0.132867	0.680597508286082
LRP4	Pe.18.3.6Z.9Z.12Z..18.1.9Z..	-0.566434	0.0548421197754078
LHFPL3	Pe.18.3.6Z.9Z.12Z..18.1.9Z..	-0.475524	0.118175957013032
DUSP2	Pe.18.3.6Z.9Z.12Z..18.1.9Z..	0.608391608391608	0.0358059970520293
PLA2G4E	Pe.18.3.6Z.9Z.12Z..18.1.9Z..	-0.321678	0.307909876180653
ORMDL3	Pe.18.3.6Z.9Z.12Z..18.1.9Z..	-0.251748	0.429918785032884
CYP26A1	Pe.18.3.6Z.9Z.12Z..18.1.9Z..	-0.531469	0.0753623350534836
XDH	Pe.18.3.6Z.9Z.12Z..18.1.9Z..	0.048951048951049	0.879918578878675
GPX3	Pe.18.3.6Z.9Z.12Z..18.1.9Z..	0.363636363636364	0.245265000730777
CD36	Pe.18.3.6Z.9Z.12Z..18.1.9Z..	-0.20979	0.512840943181826
MUC15	Pe.18.3.6Z.9Z.12Z..18.1.9Z..	-0.335664	0.286122902914987
IL1A	Pe.18.3.6Z.9Z.12Z..18.1.9Z..	0.387333548362199	0.213511552674391
POF1B	Pe.18.3.6Z.9Z.12Z..18.1.9Z..	0.377622377622378	0.226206044935027
HLA.DOB	Pe.18.3.6Z.9Z.12Z..18.1.9Z..	-0.20979	0.512840943181826
B3GAT1	Pe.18.3.6Z.9Z.12Z..18.1.9Z..	0.328671328671329	0.296904115688764
MUC5B	Pe.18.3.6Z.9Z.12Z..18.1.9Z..	0.342657342657343	0.27556745095678
CYP24A1	Pe.18.3.6Z.9Z.12Z..18.1.9Z..	0.48951048951049	0.106252371759346
CLDN8	Pe.18.3.6Z.9Z.12Z..18.1.9Z..	-0.468531	0.124454791188834
ICAM4	Pe.18.3.6Z.9Z.12Z..18.1.9Z..	0.776223776223776	0.00299286368018598
HIF3A	Pe.18.3.6Z.9Z.12Z..18.1.9Z..	-0.181818	0.571701238527655
FZD9	Pe.18.3.6Z.9Z.12Z..18.1.9Z..	-0.468531	0.124454791188834
SLC5A9	Pe.18.3.6Z.9Z.12Z..18.1.9Z..	-0.286713	0.366251460583582
PHACTR3	Pe.18.3.6Z.9Z.12Z..18.1.9Z..	-0.388792	0.211642967220043
HPCAL4	Pe.18.3.6Z.9Z.12Z..18.1.9Z..	0.0633818533683599	0.844853681587023
ANGPTL1	Pe.18.3.6Z.9Z.12Z..18.1.9Z..	-0.314685	0.319138785503305
SHH	Pe.18.3.6Z.9Z.12Z..18.1.9Z..	0.475524475524476	0.118175957013032
DUOX1	Pe.18.3.6Z.9Z.12Z..18.1.9Z..	-0.104895	0.745609480980708
HTR2C	Pe.18.3.6Z.9Z.12Z..18.1.9Z..	0.245590482948109	0.441657880650375
SLC6A14	Pe.18.3.6Z.9Z.12Z..18.1.9Z..	0.288739554233639	0.362722239733105
DGKG	Pe.18.3.6Z.9Z.12Z..18.1.9Z..	-0.27972	0.378568669662303
HSD17B2	Pe.18.3.6Z.9Z.12Z..18.1.9Z..	-0.0699301	0.829023640531309
SLPI	Pe.18.3.6Z.9Z.12Z..18.1.9Z..	0.384615384615385	0.217020225759977
LAMB3	Pe.18.3.6Z.9Z.12Z..18.1.9Z..	0.412587412587413	0.182563978573167
STEAP4	Pe.18.3.6Z.9Z.12Z..18.1.9Z..	-0.0699301	0.829023640531309
FKBP5	Pe.18.3.6Z.9Z.12Z..18.1.9Z..	-0.517483	0.0848687711339349
NOV	Pe.18.3.6Z.9Z.12Z..18.1.9Z..	-0.0559441	0.862898073694971
FAT2	Perlolyrine	-0.00832092	0.97952462867911
TMEM189.UBE2V1	Perlolyrine	-0.449768	0.142366981784969
CTD.2545G14.7	Perlolyrine	-0.430045	0.162901519736072
SULT1E1	Perlolyrine	-0.0550737	0.865013709117167
CX3CL1	Perlolyrine	0.300699300699301	0.342259528940024
VNN1	Perlolyrine	-0.041958	0.896985870819554
ZNF600	Perlolyrine	0.202797202797203	0.527302354166108
COL8A1	Perlolyrine	0.258741258741259	0.416774768899138
SIX1	Perlolyrine	0.517482517482518	0.0848687711339349
ZBTB16	Perlolyrine	-0.153846	0.633090681246262
PEBP4	Perlolyrine	-0.118881	0.712884219214772
LRP4	Perlolyrine	0.160839160839161	0.617523489540143
LHFPL3	Perlolyrine	0.0909090909090909	0.778725396245442
DUSP2	Perlolyrine	0.0839160839160839	0.795414501853898
PLA2G4E	Perlolyrine	0.125874125874126	0.696683109395766
ORMDL3	Perlolyrine	0.146853146853147	0.648795709784666
CYP26A1	Perlolyrine	-0.391608	0.208063463695353
XDH	Perlolyrine	-0.111888	0.729194990751066
GPX3	Perlolyrine	0.160839160839161	0.617523489540143
CD36	Perlolyrine	0.041958041958042	0.896985870819554
MUC15	Perlolyrine	0.00699300699300699	0.982791768902848
IL1A	Perlolyrine	0.25352741347344	0.426555665860928
POF1B	Perlolyrine	0.468531468531469	0.124454791188834
HLA.DOB	Perlolyrine	-0.293706	0.354147641232921
B3GAT1	Perlolyrine	0.440559440559441	0.15173503571673
MUC5B	Perlolyrine	0.461538461538462	0.130948069507173
CYP24A1	Perlolyrine	0.433566433566434	0.159105769412195
CLDN8	Perlolyrine	0.223776223776224	0.484451661455399
ICAM4	Perlolyrine	0.237762237762238	0.456800852639923
HIF3A	Perlolyrine	-0.0699301	0.829023640531309
FZD9	Perlolyrine	0.356643356643357	0.255137751758957
SLC5A9	Perlolyrine	-0.188811	0.556737056176831
PHACTR3	Perlolyrine	-0.234676	0.462836643549213
HPCAL4	Perlolyrine	-0.239443	0.453529963414165
ANGPTL1	Perlolyrine	-0.363636	0.245265000730777
SHH	Perlolyrine	0.496503496503497	0.100602631832255
DUOX1	Perlolyrine	0.244755244755245	0.443261936450183
HTR2C	Perlolyrine	0.523214507150319	0.0808795345970127
SLC6A14	Perlolyrine	0.492969970642799	0.103431683313594
DGKG	Perlolyrine	-0.0559441	0.862898073694971
HSD17B2	Perlolyrine	-0.153846	0.633090681246262
SLPI	Perlolyrine	0.125874125874126	0.696683109395766
LAMB3	Perlolyrine	0.391608391608392	0.208063463695353
STEAP4	Perlolyrine	0.055944055944056	0.862898073694971
FKBP5	Perlolyrine	0.265734265734266	0.403833088314712
NOV	Perlolyrine	-0.132867	0.680597508286082
FAT2	X1..1.3.Benzodioxol.5.Yl..2..4..2.Chlorophenyl.Piperazin.1.Yl.Ethanol	0.45349008548529	0.138689484544318
TMEM189.UBE2V1	X1..1.3.Benzodioxol.5.Yl..2..4..2.Chlorophenyl.Piperazin.1.Yl.Ethanol	-0.403874	0.19290610490261
CTD.2545G14.7	X1..1.3.Benzodioxol.5.Yl..2..4..2.Chlorophenyl.Piperazin.1.Yl.Ethanol	-0.639693	0.0250844025232118
SULT1E1	X1..1.3.Benzodioxol.5.Yl..2..4..2.Chlorophenyl.Piperazin.1.Yl.Ethanol	-0.0917895	0.776630219061886
CX3CL1	X1..1.3.Benzodioxol.5.Yl..2..4..2.Chlorophenyl.Piperazin.1.Yl.Ethanol	0.363636363636364	0.245265000730777
VNN1	X1..1.3.Benzodioxol.5.Yl..2..4..2.Chlorophenyl.Piperazin.1.Yl.Ethanol	-0.0699301	0.829023640531309
ZNF600	X1..1.3.Benzodioxol.5.Yl..2..4..2.Chlorophenyl.Piperazin.1.Yl.Ethanol	-0.0909091	0.778725396245442
COL8A1	X1..1.3.Benzodioxol.5.Yl..2..4..2.Chlorophenyl.Piperazin.1.Yl.Ethanol	-0.013986	0.96559026891878
SIX1	X1..1.3.Benzodioxol.5.Yl..2..4..2.Chlorophenyl.Piperazin.1.Yl.Ethanol	0.664335664335664	0.0184527180284454
ZBTB16	X1..1.3.Benzodioxol.5.Yl..2..4..2.Chlorophenyl.Piperazin.1.Yl.Ethanol	0	1
PEBP4	X1..1.3.Benzodioxol.5.Yl..2..4..2.Chlorophenyl.Piperazin.1.Yl.Ethanol	-0.356643	0.255137751758957
LRP4	X1..1.3.Benzodioxol.5.Yl..2..4..2.Chlorophenyl.Piperazin.1.Yl.Ethanol	-0.20979	0.512840943181826
LHFPL3	X1..1.3.Benzodioxol.5.Yl..2..4..2.Chlorophenyl.Piperazin.1.Yl.Ethanol	0.181818181818182	0.571701238527655
DUSP2	X1..1.3.Benzodioxol.5.Yl..2..4..2.Chlorophenyl.Piperazin.1.Yl.Ethanol	0.41958041958042	0.174519008130059
PLA2G4E	X1..1.3.Benzodioxol.5.Yl..2..4..2.Chlorophenyl.Piperazin.1.Yl.Ethanol	0.153846153846154	0.633090681246262
ORMDL3	X1..1.3.Benzodioxol.5.Yl..2..4..2.Chlorophenyl.Piperazin.1.Yl.Ethanol	-0.20979	0.512840943181826
CYP26A1	X1..1.3.Benzodioxol.5.Yl..2..4..2.Chlorophenyl.Piperazin.1.Yl.Ethanol	-0.286713	0.366251460583582
XDH	X1..1.3.Benzodioxol.5.Yl..2..4..2.Chlorophenyl.Piperazin.1.Yl.Ethanol	0.258741258741259	0.416774768899138
GPX3	X1..1.3.Benzodioxol.5.Yl..2..4..2.Chlorophenyl.Piperazin.1.Yl.Ethanol	0.342657342657343	0.27556745095678
CD36	X1..1.3.Benzodioxol.5.Yl..2..4..2.Chlorophenyl.Piperazin.1.Yl.Ethanol	-0.216783	0.498555985524188
MUC15	X1..1.3.Benzodioxol.5.Yl..2..4..2.Chlorophenyl.Piperazin.1.Yl.Ethanol	-0.181818	0.571701238527655
IL1A	X1..1.3.Benzodioxol.5.Yl..2..4..2.Chlorophenyl.Piperazin.1.Yl.Ethanol	0.415503260970359	0.179181965547571
POF1B	X1..1.3.Benzodioxol.5.Yl..2..4..2.Chlorophenyl.Piperazin.1.Yl.Ethanol	0.678321678321678	0.0153173290532817
HLA.DOB	X1..1.3.Benzodioxol.5.Yl..2..4..2.Chlorophenyl.Piperazin.1.Yl.Ethanol	-0.020979	0.948402225236522
B3GAT1	X1..1.3.Benzodioxol.5.Yl..2..4..2.Chlorophenyl.Piperazin.1.Yl.Ethanol	0.321678321678322	0.307909876180653
MUC5B	X1..1.3.Benzodioxol.5.Yl..2..4..2.Chlorophenyl.Piperazin.1.Yl.Ethanol	0.461538461538462	0.130948069507173
CYP24A1	X1..1.3.Benzodioxol.5.Yl..2..4..2.Chlorophenyl.Piperazin.1.Yl.Ethanol	0.244755244755245	0.443261936450183
CLDN8	X1..1.3.Benzodioxol.5.Yl..2..4..2.Chlorophenyl.Piperazin.1.Yl.Ethanol	0.230769230769231	0.470531995381542
ICAM4	X1..1.3.Benzodioxol.5.Yl..2..4..2.Chlorophenyl.Piperazin.1.Yl.Ethanol	0.48951048951049	0.106252371759346
HIF3A	X1..1.3.Benzodioxol.5.Yl..2..4..2.Chlorophenyl.Piperazin.1.Yl.Ethanol	-0.188811	0.556737056176831
FZD9	X1..1.3.Benzodioxol.5.Yl..2..4..2.Chlorophenyl.Piperazin.1.Yl.Ethanol	0.132867132867133	0.680597508286082
SLC5A9	X1..1.3.Benzodioxol.5.Yl..2..4..2.Chlorophenyl.Piperazin.1.Yl.Ethanol	-0.111888	0.729194990751066
PHACTR3	X1..1.3.Benzodioxol.5.Yl..2..4..2.Chlorophenyl.Piperazin.1.Yl.Ethanol	-0.339755	0.279920349686442
HPCAL4	X1..1.3.Benzodioxol.5.Yl..2..4..2.Chlorophenyl.Piperazin.1.Yl.Ethanol	-0.154933	0.63066112575018
ANGPTL1	X1..1.3.Benzodioxol.5.Yl..2..4..2.Chlorophenyl.Piperazin.1.Yl.Ethanol	-0.258741	0.416774768899138
SHH	X1..1.3.Benzodioxol.5.Yl..2..4..2.Chlorophenyl.Piperazin.1.Yl.Ethanol	0.727272727272727	0.00735502885780513
DUOX1	X1..1.3.Benzodioxol.5.Yl..2..4..2.Chlorophenyl.Piperazin.1.Yl.Ethanol	0.223776223776224	0.484451661455399
HTR2C	X1..1.3.Benzodioxol.5.Yl..2..4..2.Chlorophenyl.Piperazin.1.Yl.Ethanol	0.651348672166723	0.0217628231136753
SLC6A14	X1..1.3.Benzodioxol.5.Yl..2..4..2.Chlorophenyl.Piperazin.1.Yl.Ethanol	0.528182111402999	0.077527200453535
DGKG	X1..1.3.Benzodioxol.5.Yl..2..4..2.Chlorophenyl.Piperazin.1.Yl.Ethanol	-0.328671	0.296904115688764
HSD17B2	X1..1.3.Benzodioxol.5.Yl..2..4..2.Chlorophenyl.Piperazin.1.Yl.Ethanol	0.153846153846154	0.633090681246262
SLPI	X1..1.3.Benzodioxol.5.Yl..2..4..2.Chlorophenyl.Piperazin.1.Yl.Ethanol	0.531468531468532	0.0753623350534836
LAMB3	X1..1.3.Benzodioxol.5.Yl..2..4..2.Chlorophenyl.Piperazin.1.Yl.Ethanol	0.398601398601399	0.199335494617809
STEAP4	X1..1.3.Benzodioxol.5.Yl..2..4..2.Chlorophenyl.Piperazin.1.Yl.Ethanol	-0.104895	0.745609480980708
FKBP5	X1..1.3.Benzodioxol.5.Yl..2..4..2.Chlorophenyl.Piperazin.1.Yl.Ethanol	-0.104895	0.745609480980708
NOV	X1..1.3.Benzodioxol.5.Yl..2..4..2.Chlorophenyl.Piperazin.1.Yl.Ethanol	-0.132867	0.680597508286082
FAT2	X5.Phenyl.1.3.Oxazinane.2.4.Dione	0.278750786490958	0.38029300139806
TMEM189.UBE2V1	X5.Phenyl.1.3.Oxazinane.2.4.Dione	-0.0183579	0.95484265706236
CTD.2545G14.7	X5.Phenyl.1.3.Oxazinane.2.4.Dione	-0.499928	0.0979108806782636
SULT1E1	X5.Phenyl.1.3.Oxazinane.2.4.Dione	0.0642526397805037	0.842745428367182
CX3CL1	X5.Phenyl.1.3.Oxazinane.2.4.Dione	0.104895104895105	0.745609480980708
VNN1	X5.Phenyl.1.3.Oxazinane.2.4.Dione	-0.461538	0.130948069507173
ZNF600	X5.Phenyl.1.3.Oxazinane.2.4.Dione	-0.125874	0.696683109395766
COL8A1	X5.Phenyl.1.3.Oxazinane.2.4.Dione	0.132867132867133	0.680597508286082
SIX1	X5.Phenyl.1.3.Oxazinane.2.4.Dione	-0.041958	0.896985870819554
ZBTB16	X5.Phenyl.1.3.Oxazinane.2.4.Dione	0.314685314685315	0.319138785503305
PEBP4	X5.Phenyl.1.3.Oxazinane.2.4.Dione	-0.048951	0.879918578878675
LRP4	X5.Phenyl.1.3.Oxazinane.2.4.Dione	0.055944055944056	0.862898073694971
LHFPL3	X5.Phenyl.1.3.Oxazinane.2.4.Dione	0.0769230769230769	0.812182698028059
DUSP2	X5.Phenyl.1.3.Oxazinane.2.4.Dione	0.104895104895105	0.745609480980708
PLA2G4E	X5.Phenyl.1.3.Oxazinane.2.4.Dione	-0.104895	0.745609480980708
ORMDL3	X5.Phenyl.1.3.Oxazinane.2.4.Dione	-0.552448	0.0625114832796152
CYP26A1	X5.Phenyl.1.3.Oxazinane.2.4.Dione	0.258741258741259	0.416774768899138
XDH	X5.Phenyl.1.3.Oxazinane.2.4.Dione	0.020979020979021	0.948402225236522
GPX3	X5.Phenyl.1.3.Oxazinane.2.4.Dione	0.20979020979021	0.512840943181826
CD36	X5.Phenyl.1.3.Oxazinane.2.4.Dione	-0.314685	0.319138785503305
MUC15	X5.Phenyl.1.3.Oxazinane.2.4.Dione	-0.286713	0.366251460583582
IL1A	X5.Phenyl.1.3.Oxazinane.2.4.Dione	-0.169018	0.599497869823576
POF1B	X5.Phenyl.1.3.Oxazinane.2.4.Dione	0.153846153846154	0.633090681246262
HLA.DOB	X5.Phenyl.1.3.Oxazinane.2.4.Dione	-0.167832	0.602099427786538
B3GAT1	X5.Phenyl.1.3.Oxazinane.2.4.Dione	0.440559440559441	0.15173503571673
MUC5B	X5.Phenyl.1.3.Oxazinane.2.4.Dione	-0.181818	0.571701238527655
CYP24A1	X5.Phenyl.1.3.Oxazinane.2.4.Dione	0.0769230769230769	0.812182698028059
CLDN8	X5.Phenyl.1.3.Oxazinane.2.4.Dione	0.027972027972028	0.931234351201881
ICAM4	X5.Phenyl.1.3.Oxazinane.2.4.Dione	0.104895104895105	0.745609480980708
HIF3A	X5.Phenyl.1.3.Oxazinane.2.4.Dione	0.13986013986014	0.664633161792668
FZD9	X5.Phenyl.1.3.Oxazinane.2.4.Dione	0.0909090909090909	0.778725396245442
SLC5A9	X5.Phenyl.1.3.Oxazinane.2.4.Dione	-0.328671	0.296904115688764
PHACTR3	X5.Phenyl.1.3.Oxazinane.2.4.Dione	0.157618455376128	0.624675666406758
HPCAL4	X5.Phenyl.1.3.Oxazinane.2.4.Dione	0.387333548362199	0.213511552674391
ANGPTL1	X5.Phenyl.1.3.Oxazinane.2.4.Dione	0.146853146853147	0.648795709784666
SHH	X5.Phenyl.1.3.Oxazinane.2.4.Dione	0.041958041958042	0.896985870819554
DUOX1	X5.Phenyl.1.3.Oxazinane.2.4.Dione	0.020979020979021	0.948402225236522
HTR2C	X5.Phenyl.1.3.Oxazinane.2.4.Dione	0.398639624495481	0.199288412904981
SLC6A14	X5.Phenyl.1.3.Oxazinane.2.4.Dione	0.359163835754039	0.251552990266395
DGKG	X5.Phenyl.1.3.Oxazinane.2.4.Dione	-0.356643	0.255137751758957
HSD17B2	X5.Phenyl.1.3.Oxazinane.2.4.Dione	-0.0979021	0.762121655996299
SLPI	X5.Phenyl.1.3.Oxazinane.2.4.Dione	0.00699300699300699	0.982791768902848
LAMB3	X5.Phenyl.1.3.Oxazinane.2.4.Dione	-0.027972	0.931234351201881
STEAP4	X5.Phenyl.1.3.Oxazinane.2.4.Dione	-0.0839161	0.795414501853898
FKBP5	X5.Phenyl.1.3.Oxazinane.2.4.Dione	-0.314685	0.319138785503305
NOV	X5.Phenyl.1.3.Oxazinane.2.4.Dione	-0.174825	0.586823664362704
FAT2	Bis.2.Hydroxy.1.Naphthyl..Disulfide	0.457650544985155	0.134651695388669
TMEM189.UBE2V1	Bis.2.Hydroxy.1.Naphthyl..Disulfide	-0.477305	0.11661096970342
CTD.2545G14.7	Bis.2.Hydroxy.1.Naphthyl..Disulfide	-0.381665	0.22086746731077
SULT1E1	Bis.2.Hydroxy.1.Naphthyl..Disulfide	-0.26619	0.402997678092235
CX3CL1	Bis.2.Hydroxy.1.Naphthyl..Disulfide	0.398601398601399	0.199335494617809
VNN1	Bis.2.Hydroxy.1.Naphthyl..Disulfide	-0.13986	0.664633161792668
ZNF600	Bis.2.Hydroxy.1.Naphthyl..Disulfide	-0.216783	0.498555985524188
COL8A1	Bis.2.Hydroxy.1.Naphthyl..Disulfide	0.118881118881119	0.712884219214772
SIX1	Bis.2.Hydroxy.1.Naphthyl..Disulfide	0.412587412587413	0.182563978573167
ZBTB16	Bis.2.Hydroxy.1.Naphthyl..Disulfide	0.020979020979021	0.948402225236522
PEBP4	Bis.2.Hydroxy.1.Naphthyl..Disulfide	-0.398601	0.199335494617809
LRP4	Bis.2.Hydroxy.1.Naphthyl..Disulfide	-0.41958	0.174519008130059
LHFPL3	Bis.2.Hydroxy.1.Naphthyl..Disulfide	0.055944055944056	0.862898073694971
DUSP2	Bis.2.Hydroxy.1.Naphthyl..Disulfide	0.657342657342657	0.0201854985098541
PLA2G4E	Bis.2.Hydroxy.1.Naphthyl..Disulfide	-0.118881	0.712884219214772
ORMDL3	Bis.2.Hydroxy.1.Naphthyl..Disulfide	-0.412587	0.182563978573167
CYP26A1	Bis.2.Hydroxy.1.Naphthyl..Disulfide	-0.307692	0.33058925941211
XDH	Bis.2.Hydroxy.1.Naphthyl..Disulfide	0.125874125874126	0.696683109395766
GPX3	Bis.2.Hydroxy.1.Naphthyl..Disulfide	0.34965034965035	0.26523878689279
CD36	Bis.2.Hydroxy.1.Naphthyl..Disulfide	-0.293706	0.354147641232921
MUC15	Bis.2.Hydroxy.1.Naphthyl..Disulfide	-0.27972	0.378568669662303
IL1A	Bis.2.Hydroxy.1.Naphthyl..Disulfide	0.373248692058119	0.23206767137486
POF1B	Bis.2.Hydroxy.1.Naphthyl..Disulfide	0.657342657342657	0.0201854985098541
HLA.DOB	Bis.2.Hydroxy.1.Naphthyl..Disulfide	-0.174825	0.586823664362704
B3GAT1	Bis.2.Hydroxy.1.Naphthyl..Disulfide	0.34965034965035	0.26523878689279
MUC5B	Bis.2.Hydroxy.1.Naphthyl..Disulfide	0.41958041958042	0.174519008130059
CYP24A1	Bis.2.Hydroxy.1.Naphthyl..Disulfide	0.0629370629370629	0.845930921228779
CLDN8	Bis.2.Hydroxy.1.Naphthyl..Disulfide	0.034965034965035	0.91409334241076
ICAM4	Bis.2.Hydroxy.1.Naphthyl..Disulfide	0.657342657342657	0.0201854985098541
HIF3A	Bis.2.Hydroxy.1.Naphthyl..Disulfide	-0.265734	0.403833088314712
FZD9	Bis.2.Hydroxy.1.Naphthyl..Disulfide	-0.167832	0.602099427786538
SLC5A9	Bis.2.Hydroxy.1.Naphthyl..Disulfide	-0.174825	0.586823664362704
PHACTR3	Bis.2.Hydroxy.1.Naphthyl..Disulfide	-0.413311	0.181721477401602
HPCAL4	Bis.2.Hydroxy.1.Naphthyl..Disulfide	-0.274655	0.387622850591306
ANGPTL1	Bis.2.Hydroxy.1.Naphthyl..Disulfide	-0.20979	0.512840943181826
SHH	Bis.2.Hydroxy.1.Naphthyl..Disulfide	0.685314685314685	0.0139059688143628
DUOX1	Bis.2.Hydroxy.1.Naphthyl..Disulfide	0.00699300699300699	0.982791768902848
HTR2C	Bis.2.Hydroxy.1.Naphthyl..Disulfide	0.441351012834282	0.150914722853939
SLC6A14	Bis.2.Hydroxy.1.Naphthyl..Disulfide	0.415503260970359	0.179181965547571
DGKG	Bis.2.Hydroxy.1.Naphthyl..Disulfide	-0.496503	0.100602631832255
HSD17B2	Bis.2.Hydroxy.1.Naphthyl..Disulfide	-0.041958	0.896985870819554
SLPI	Bis.2.Hydroxy.1.Naphthyl..Disulfide	0.615384615384615	0.0331699010901058
LAMB3	Bis.2.Hydroxy.1.Naphthyl..Disulfide	0.398601398601399	0.199335494617809
STEAP4	Bis.2.Hydroxy.1.Naphthyl..Disulfide	-0.440559	0.15173503571673
FKBP5	Bis.2.Hydroxy.1.Naphthyl..Disulfide	-0.384615	0.217020225759977
NOV	Bis.2.Hydroxy.1.Naphthyl..Disulfide	-0.328671	0.296904115688764
FAT2	X2..2.Chlorophenyl..N..4..4.Phenyl.1.3.Oxazol.2.Yl.Phenyl.Acetamide	-0.399404	0.198348248788926
TMEM189.UBE2V1	X2..2.Chlorophenyl..N..4..4.Phenyl.1.3.Oxazol.2.Yl.Phenyl.Acetamide	0.348800044522734	0.266482545365153
CTD.2545G14.7	X2..2.Chlorophenyl..N..4..4.Phenyl.1.3.Oxazol.2.Yl.Phenyl.Acetamide	0.430045378901151	0.162901519736072
SULT1E1	X2..2.Chlorophenyl..N..4..4.Phenyl.1.3.Oxazol.2.Yl.Phenyl.Acetamide	0.247831610581943	0.437367692619138
CX3CL1	X2..2.Chlorophenyl..N..4..4.Phenyl.1.3.Oxazol.2.Yl.Phenyl.Acetamide	-0.552448	0.0625114832796152
VNN1	X2..2.Chlorophenyl..N..4..4.Phenyl.1.3.Oxazol.2.Yl.Phenyl.Acetamide	0.566433566433566	0.0548421197754078
ZNF600	X2..2.Chlorophenyl..N..4..4.Phenyl.1.3.Oxazol.2.Yl.Phenyl.Acetamide	0.174825174825175	0.586823664362704
COL8A1	X2..2.Chlorophenyl..N..4..4.Phenyl.1.3.Oxazol.2.Yl.Phenyl.Acetamide	-0.699301	0.0113741986426909
SIX1	X2..2.Chlorophenyl..N..4..4.Phenyl.1.3.Oxazol.2.Yl.Phenyl.Acetamide	-0.20979	0.512840943181826
ZBTB16	X2..2.Chlorophenyl..N..4..4.Phenyl.1.3.Oxazol.2.Yl.Phenyl.Acetamide	0.216783216783217	0.498555985524188
PEBP4	X2..2.Chlorophenyl..N..4..4.Phenyl.1.3.Oxazol.2.Yl.Phenyl.Acetamide	0.202797202797203	0.527302354166108
LRP4	X2..2.Chlorophenyl..N..4..4.Phenyl.1.3.Oxazol.2.Yl.Phenyl.Acetamide	-0.111888	0.729194990751066
LHFPL3	X2..2.Chlorophenyl..N..4..4.Phenyl.1.3.Oxazol.2.Yl.Phenyl.Acetamide	0.160839160839161	0.617523489540143
DUSP2	X2..2.Chlorophenyl..N..4..4.Phenyl.1.3.Oxazol.2.Yl.Phenyl.Acetamide	0.0699300699300699	0.829023640531309
PLA2G4E	X2..2.Chlorophenyl..N..4..4.Phenyl.1.3.Oxazol.2.Yl.Phenyl.Acetamide	0.146853146853147	0.648795709784666
ORMDL3	X2..2.Chlorophenyl..N..4..4.Phenyl.1.3.Oxazol.2.Yl.Phenyl.Acetamide	0.195804195804196	0.541935885731317
CYP26A1	X2..2.Chlorophenyl..N..4..4.Phenyl.1.3.Oxazol.2.Yl.Phenyl.Acetamide	0.286713286713287	0.366251460583582
XDH	X2..2.Chlorophenyl..N..4..4.Phenyl.1.3.Oxazol.2.Yl.Phenyl.Acetamide	0.517482517482518	0.0848687711339349
GPX3	X2..2.Chlorophenyl..N..4..4.Phenyl.1.3.Oxazol.2.Yl.Phenyl.Acetamide	-0.34965	0.26523878689279
CD36	X2..2.Chlorophenyl..N..4..4.Phenyl.1.3.Oxazol.2.Yl.Phenyl.Acetamide	0.27972027972028	0.378568669662303
MUC15	X2..2.Chlorophenyl..N..4..4.Phenyl.1.3.Oxazol.2.Yl.Phenyl.Acetamide	0.174825174825175	0.586823664362704
IL1A	X2..2.Chlorophenyl..N..4..4.Phenyl.1.3.Oxazol.2.Yl.Phenyl.Acetamide	-0.119721	0.710931859519093
POF1B	X2..2.Chlorophenyl..N..4..4.Phenyl.1.3.Oxazol.2.Yl.Phenyl.Acetamide	-0.412587	0.182563978573167
HLA.DOB	X2..2.Chlorophenyl..N..4..4.Phenyl.1.3.Oxazol.2.Yl.Phenyl.Acetamide	0.41958041958042	0.174519008130059
B3GAT1	X2..2.Chlorophenyl..N..4..4.Phenyl.1.3.Oxazol.2.Yl.Phenyl.Acetamide	-0.713287	0.00920177977763475
MUC5B	X2..2.Chlorophenyl..N..4..4.Phenyl.1.3.Oxazol.2.Yl.Phenyl.Acetamide	-0.181818	0.571701238527655
CYP24A1	X2..2.Chlorophenyl..N..4..4.Phenyl.1.3.Oxazol.2.Yl.Phenyl.Acetamide	-0.342657	0.27556745095678
CLDN8	X2..2.Chlorophenyl..N..4..4.Phenyl.1.3.Oxazol.2.Yl.Phenyl.Acetamide	0.181818181818182	0.571701238527655
ICAM4	X2..2.Chlorophenyl..N..4..4.Phenyl.1.3.Oxazol.2.Yl.Phenyl.Acetamide	-0.13986	0.664633161792668
HIF3A	X2..2.Chlorophenyl..N..4..4.Phenyl.1.3.Oxazol.2.Yl.Phenyl.Acetamide	0.181818181818182	0.571701238527655
FZD9	X2..2.Chlorophenyl..N..4..4.Phenyl.1.3.Oxazol.2.Yl.Phenyl.Acetamide	0.0629370629370629	0.845930921228779
SLC5A9	X2..2.Chlorophenyl..N..4..4.Phenyl.1.3.Oxazol.2.Yl.Phenyl.Acetamide	0.447552447552448	0.144586301303347
PHACTR3	X2..2.Chlorophenyl..N..4..4.Phenyl.1.3.Oxazol.2.Yl.Phenyl.Acetamide	-0.0350263	0.913943252875241
HPCAL4	X2..2.Chlorophenyl..N..4..4.Phenyl.1.3.Oxazol.2.Yl.Phenyl.Acetamide	0	1
ANGPTL1	X2..2.Chlorophenyl..N..4..4.Phenyl.1.3.Oxazol.2.Yl.Phenyl.Acetamide	0.27972027972028	0.378568669662303
SHH	X2..2.Chlorophenyl..N..4..4.Phenyl.1.3.Oxazol.2.Yl.Phenyl.Acetamide	-0.153846	0.633090681246262
DUOX1	X2..2.Chlorophenyl..N..4..4.Phenyl.1.3.Oxazol.2.Yl.Phenyl.Acetamide	0.055944055944056	0.862898073694971
HTR2C	X2..2.Chlorophenyl..N..4..4.Phenyl.1.3.Oxazol.2.Yl.Phenyl.Acetamide	-0.608637	0.0357109310606558
SLC6A14	X2..2.Chlorophenyl..N..4..4.Phenyl.1.3.Oxazol.2.Yl.Phenyl.Acetamide	-0.718328	0.00850035683818144
DGKG	X2..2.Chlorophenyl..N..4..4.Phenyl.1.3.Oxazol.2.Yl.Phenyl.Acetamide	0.153846153846154	0.633090681246262
HSD17B2	X2..2.Chlorophenyl..N..4..4.Phenyl.1.3.Oxazol.2.Yl.Phenyl.Acetamide	0.314685314685315	0.319138785503305
SLPI	X2..2.Chlorophenyl..N..4..4.Phenyl.1.3.Oxazol.2.Yl.Phenyl.Acetamide	0.125874125874126	0.696683109395766
LAMB3	X2..2.Chlorophenyl..N..4..4.Phenyl.1.3.Oxazol.2.Yl.Phenyl.Acetamide	-0.293706	0.354147641232921
STEAP4	X2..2.Chlorophenyl..N..4..4.Phenyl.1.3.Oxazol.2.Yl.Phenyl.Acetamide	-0.0979021	0.762121655996299
FKBP5	X2..2.Chlorophenyl..N..4..4.Phenyl.1.3.Oxazol.2.Yl.Phenyl.Acetamide	0.0629370629370629	0.845930921228779
NOV	X2..2.Chlorophenyl..N..4..4.Phenyl.1.3.Oxazol.2.Yl.Phenyl.Acetamide	0.20979020979021	0.512840943181826
FAT2	X1.3.6.Trihydroxy.2..3.Methylbut.2.Enyl.Xanthen.9.One	-0.399404	0.198348248788926
TMEM189.UBE2V1	X1.3.6.Trihydroxy.2..3.Methylbut.2.Enyl.Xanthen.9.One	0.587452706564605	0.0445911324005284
CTD.2545G14.7	X1.3.6.Trihydroxy.2..3.Methylbut.2.Enyl.Xanthen.9.One	0.204271554978047	0.52423895410183
SULT1E1	X1.3.6.Trihydroxy.2..3.Methylbut.2.Enyl.Xanthen.9.One	0.578273758024533	0.0488847120397926
CX3CL1	X1.3.6.Trihydroxy.2..3.Methylbut.2.Enyl.Xanthen.9.One	-0.671329	0.0168314561868934
VNN1	X1.3.6.Trihydroxy.2..3.Methylbut.2.Enyl.Xanthen.9.One	0.377622377622378	0.226206044935027
ZNF600	X1.3.6.Trihydroxy.2..3.Methylbut.2.Enyl.Xanthen.9.One	0.692307692307692	0.0125930304960941
COL8A1	X1.3.6.Trihydroxy.2..3.Methylbut.2.Enyl.Xanthen.9.One	-0.153846	0.633090681246262
SIX1	X1.3.6.Trihydroxy.2..3.Methylbut.2.Enyl.Xanthen.9.One	-0.776224	0.00299286368018598
ZBTB16	X1.3.6.Trihydroxy.2..3.Methylbut.2.Enyl.Xanthen.9.One	0.531468531468532	0.0753623350534836
PEBP4	X1.3.6.Trihydroxy.2..3.Methylbut.2.Enyl.Xanthen.9.One	0.559440559440559	0.0585894753885676
LRP4	X1.3.6.Trihydroxy.2..3.Methylbut.2.Enyl.Xanthen.9.One	0.629370629370629	0.0283196712957601
LHFPL3	X1.3.6.Trihydroxy.2..3.Methylbut.2.Enyl.Xanthen.9.One	0.426573426573427	0.166699987624945
DUSP2	X1.3.6.Trihydroxy.2..3.Methylbut.2.Enyl.Xanthen.9.One	-0.629371	0.0283196712957601
PLA2G4E	X1.3.6.Trihydroxy.2..3.Methylbut.2.Enyl.Xanthen.9.One	0.13986013986014	0.664633161792668
ORMDL3	X1.3.6.Trihydroxy.2..3.Methylbut.2.Enyl.Xanthen.9.One	0.342657342657343	0.27556745095678
CYP26A1	X1.3.6.Trihydroxy.2..3.Methylbut.2.Enyl.Xanthen.9.One	0.657342657342657	0.0201854985098541
XDH	X1.3.6.Trihydroxy.2..3.Methylbut.2.Enyl.Xanthen.9.One	0.188811188811189	0.556737056176831
GPX3	X1.3.6.Trihydroxy.2..3.Methylbut.2.Enyl.Xanthen.9.One	-0.300699	0.342259528940024
CD36	X1.3.6.Trihydroxy.2..3.Methylbut.2.Enyl.Xanthen.9.One	0.482517482517483	0.112109291468892
MUC15	X1.3.6.Trihydroxy.2..3.Methylbut.2.Enyl.Xanthen.9.One	0.643356643356643	0.0240031912007137
IL1A	X1.3.6.Trihydroxy.2..3.Methylbut.2.Enyl.Xanthen.9.One	-0.816922	0.00118060561747551
POF1B	X1.3.6.Trihydroxy.2..3.Methylbut.2.Enyl.Xanthen.9.One	-0.846154	0.000521133700481004
HLA.DOB	X1.3.6.Trihydroxy.2..3.Methylbut.2.Enyl.Xanthen.9.One	0.356643356643357	0.255137751758957
B3GAT1	X1.3.6.Trihydroxy.2..3.Methylbut.2.Enyl.Xanthen.9.One	-0.433566	0.159105769412195
MUC5B	X1.3.6.Trihydroxy.2..3.Methylbut.2.Enyl.Xanthen.9.One	-0.783217	0.00258621483336258
CYP24A1	X1.3.6.Trihydroxy.2..3.Methylbut.2.Enyl.Xanthen.9.One	-0.517483	0.0848687711339349
CLDN8	X1.3.6.Trihydroxy.2..3.Methylbut.2.Enyl.Xanthen.9.One	0.363636363636364	0.245265000730777
ICAM4	X1.3.6.Trihydroxy.2..3.Methylbut.2.Enyl.Xanthen.9.One	-0.699301	0.0113741986426909
HIF3A	X1.3.6.Trihydroxy.2..3.Methylbut.2.Enyl.Xanthen.9.One	0.566433566433566	0.0548421197754078
FZD9	X1.3.6.Trihydroxy.2..3.Methylbut.2.Enyl.Xanthen.9.One	0.293706293706294	0.354147641232921
SLC5A9	X1.3.6.Trihydroxy.2..3.Methylbut.2.Enyl.Xanthen.9.One	0.335664335664336	0.286122902914987
PHACTR3	X1.3.6.Trihydroxy.2..3.Methylbut.2.Enyl.Xanthen.9.One	0.683013306629888	0.0143593660834832
HPCAL4	X1.3.6.Trihydroxy.2..3.Methylbut.2.Enyl.Xanthen.9.One	0.387333548362199	0.213511552674391
ANGPTL1	X1.3.6.Trihydroxy.2..3.Methylbut.2.Enyl.Xanthen.9.One	0.727272727272727	0.00735502885780513
SHH	X1.3.6.Trihydroxy.2..3.Methylbut.2.Enyl.Xanthen.9.One	-0.594406	0.0415214944103185
DUOX1	X1.3.6.Trihydroxy.2..3.Methylbut.2.Enyl.Xanthen.9.One	0.377622377622378	0.226206044935027
HTR2C	X1.3.6.Trihydroxy.2..3.Methylbut.2.Enyl.Xanthen.9.One	-0.74389	0.00553893820650458
SLC6A14	X1.3.6.Trihydroxy.2..3.Methylbut.2.Enyl.Xanthen.9.One	-0.507055	0.0924641835951044
DGKG	X1.3.6.Trihydroxy.2..3.Methylbut.2.Enyl.Xanthen.9.One	0.545454545454546	0.066611882266889
HSD17B2	X1.3.6.Trihydroxy.2..3.Methylbut.2.Enyl.Xanthen.9.One	0.244755244755245	0.443261936450183
SLPI	X1.3.6.Trihydroxy.2..3.Methylbut.2.Enyl.Xanthen.9.One	-0.426573	0.166699987624945
LAMB3	X1.3.6.Trihydroxy.2..3.Methylbut.2.Enyl.Xanthen.9.One	-0.608392	0.0358059970520293
STEAP4	X1.3.6.Trihydroxy.2..3.Methylbut.2.Enyl.Xanthen.9.One	0.286713286713287	0.366251460583582
FKBP5	X1.3.6.Trihydroxy.2..3.Methylbut.2.Enyl.Xanthen.9.One	0.398601398601399	0.199335494617809
NOV	X1.3.6.Trihydroxy.2..3.Methylbut.2.Enyl.Xanthen.9.One	0.377622377622378	0.226206044935027
FAT2	Cascarillin	-0.669834	0.0171688350695961
TMEM189.UBE2V1	Cascarillin	0.614989552184821	0.0333149976621793
CTD.2545G14.7	Cascarillin	0.252651660104426	0.428209473216082
SULT1E1	Cascarillin	0.550736912404317	0.0634979060802678
CX3CL1	Cascarillin	-0.636364	0.0260968910527031
VNN1	Cascarillin	0.510489510489511	0.089913736302639
ZNF600	Cascarillin	0.356643356643357	0.255137751758957
COL8A1	Cascarillin	-0.300699	0.342259528940024
SIX1	Cascarillin	-0.482517	0.112109291468892
ZBTB16	Cascarillin	0.314685314685315	0.319138785503305
PEBP4	Cascarillin	0.433566433566434	0.159105769412195
LRP4	Cascarillin	0.503496503496504	0.0951573665941247
LHFPL3	Cascarillin	0.440559440559441	0.15173503571673
DUSP2	Cascarillin	-0.762238	0.00395044897254266
PLA2G4E	Cascarillin	0.468531468531469	0.124454791188834
ORMDL3	Cascarillin	0.41958041958042	0.174519008130059
CYP26A1	Cascarillin	0.363636363636364	0.245265000730777
XDH	Cascarillin	0.20979020979021	0.512840943181826
GPX3	Cascarillin	-0.762238	0.00395044897254266
CD36	Cascarillin	0.454545454545455	0.137657916347729
MUC15	Cascarillin	0.391608391608392	0.208063463695353
IL1A	Cascarillin	-0.457758	0.134548594648049
POF1B	Cascarillin	-0.699301	0.0113741986426909
HLA.DOB	Cascarillin	0.594405594405594	0.0415214944103185
B3GAT1	Cascarillin	-0.713287	0.00920177977763475
MUC5B	Cascarillin	-0.566434	0.0548421197754078
CYP24A1	Cascarillin	-0.51049	0.089913736302639
CLDN8	Cascarillin	0.412587412587413	0.182563978573167
ICAM4	Cascarillin	-0.839161	0.000642825988627822
HIF3A	Cascarillin	0.356643356643357	0.255137751758957
FZD9	Cascarillin	0.216783216783217	0.498555985524188
SLC5A9	Cascarillin	0.72027972027972	0.00823976871233844
PHACTR3	Cascarillin	0.54641064530391	0.0660406040682351
HPCAL4	Cascarillin	0.345078979449959	0.271964979807583
ANGPTL1	Cascarillin	0.475524475524476	0.118175957013032
SHH	Cascarillin	-0.867133	0.000259811849861481
DUOX1	Cascarillin	0.125874125874126	0.696683109395766
HTR2C	Cascarillin	-0.519655	0.0833412839285143
SLC6A14	Cascarillin	-0.760582	0.00407753363322813
DGKG	Cascarillin	0.573426573426573	0.0512655897864915
HSD17B2	Cascarillin	0.433566433566434	0.159105769412195
SLPI	Cascarillin	-0.447552	0.144586301303347
LAMB3	Cascarillin	-0.699301	0.0113741986426909
STEAP4	Cascarillin	0.433566433566434	0.159105769412195
FKBP5	Cascarillin	0.608391608391608	0.0358059970520293
NOV	Cascarillin	0.426573426573427	0.166699987624945
FAT2	Pe.20.5.0.0.	-0.707278	0.0100932326569596
TMEM189.UBE2V1	Pe.20.5.0.0.	0.495663221163886	0.101270637740195
CTD.2545G14.7	Pe.20.5.0.0.	0.241900525631897	0.448765408967347
SULT1E1	Pe.20.5.0.0.	0.596631655104677	0.0405712358994523
CX3CL1	Pe.20.5.0.0.	-0.727273	0.00735502885780513
VNN1	Pe.20.5.0.0.	0.657342657342657	0.0201854985098541
ZNF600	Pe.20.5.0.0.	0.636363636363636	0.0260968910527031
COL8A1	Pe.20.5.0.0.	-0.426573	0.166699987624945
SIX1	Pe.20.5.0.0.	-0.594406	0.0415214944103185
ZBTB16	Pe.20.5.0.0.	0.468531468531469	0.124454791188834
PEBP4	Pe.20.5.0.0.	0.48951048951049	0.106252371759346
LRP4	Pe.20.5.0.0.	0.559440559440559	0.0585894753885676
LHFPL3	Pe.20.5.0.0.	0.482517482517483	0.112109291468892
DUSP2	Pe.20.5.0.0.	-0.706294	0.0102451939411279
PLA2G4E	Pe.20.5.0.0.	0.118881118881119	0.712884219214772
ORMDL3	Pe.20.5.0.0.	0.783216783216783	0.00258621483336258
CYP26A1	Pe.20.5.0.0.	0.342657342657343	0.27556745095678
XDH	Pe.20.5.0.0.	0.20979020979021	0.512840943181826
GPX3	Pe.20.5.0.0.	-0.636364	0.0260968910527031
CD36	Pe.20.5.0.0.	0.580419580419581	0.0478559768420606
MUC15	Pe.20.5.0.0.	0.608391608391608	0.0358059970520293
IL1A	Pe.20.5.0.0.	-0.690158	0.0129864256750896
POF1B	Pe.20.5.0.0.	-0.888112	0.00011413359814618
HLA.DOB	Pe.20.5.0.0.	0.580419580419581	0.0478559768420606
B3GAT1	Pe.20.5.0.0.	-0.811189	0.00136331525272719
MUC5B	Pe.20.5.0.0.	-0.65035	0.0220341909323653
CYP24A1	Pe.20.5.0.0.	-0.48951	0.106252371759346
CLDN8	Pe.20.5.0.0.	0.503496503496504	0.0951573665941247
ICAM4	Pe.20.5.0.0.	-0.769231	0.00344645026182745
HIF3A	Pe.20.5.0.0.	0.587412587412588	0.044609296463363
FZD9	Pe.20.5.0.0.	0.0839160839160839	0.795414501853898
SLC5A9	Pe.20.5.0.0.	0.643356643356643	0.0240031912007137
PHACTR3	Pe.20.5.0.0.	0.521892218912068	0.0817882263815284
HPCAL4	Pe.20.5.0.0.	0.316909266841799	0.315543603616405
ANGPTL1	Pe.20.5.0.0.	0.678321678321678	0.0153173290532817
SHH	Pe.20.5.0.0.	-0.601399	0.0385884529220194
DUOX1	Pe.20.5.0.0.	0.342657342657343	0.27556745095678
HTR2C	Pe.20.5.0.0.	-0.797279	0.00189705004998911
SLC6A14	Pe.20.5.0.0.	-0.809879	0.00140794144250932
DGKG	Pe.20.5.0.0.	0.573426573426573	0.0512655897864915
HSD17B2	Pe.20.5.0.0.	0.398601398601399	0.199335494617809
SLPI	Pe.20.5.0.0.	-0.496503	0.100602631832255
LAMB3	Pe.20.5.0.0.	-0.685315	0.0139059688143628
STEAP4	Pe.20.5.0.0.	0.321678321678322	0.307909876180653
FKBP5	Pe.20.5.0.0.	0.510489510489511	0.089913736302639
NOV	Pe.20.5.0.0.	0.370629370629371	0.235621003512646
