# Supplementary material for: Integrated multi-omics analysis to investigate the pathogenesis of intrauterine adhesion
Source: Research Square preprint supplement (doi:10.21203/rs.3.rs-7079007/v1), 2025-08-08
Supplement: Supplementary file 8 [file bd2460090e37111b9a76c3ad.xlsx]

## Sheet: Sheet1
Table S2 rawdata Base position quality score statistics
	Sample ID	Raw Data	Q20%	Q30%
Control	N1	175136294	96.71	91.44
	N2	134649366	96.38	90.7
	N3	113478136	97.01	92.31
	N4	115771100	97.21	92.74
	N5	148215494	97.28	93.27
	N6	133416932	96.76	91.65
IUA	IUA1	129057634	95.96	89.65
	IUA2	210264416	97.7	94.28
	IUA3	123559722	96.77	91.64
	IUA4	114173512	96.25	90.34
	IUA5	129766472	97.61	93.64
	IUA6	114116880	97.09	92.44
