# Supplementary material for: Integrated multi-omics analysis to investigate the pathogenesis of intrauterine adhesion
Source: Research Square preprint supplement (doi:10.21203/rs.3.rs-7079007/v1), 2025-08-08
Supplement: Supplementary file 9 [file c5638356a953e0dc18384a2e.xlsx]

## Sheet: 01.DUSP2_result
ID	Description	setSize	enrichmentScore	NES	pvalue	p.adjust	qvalue	rank	leading_edge	core_enrichment
KEGG_RIBOSOME	KEGG_RIBOSOME	86	0.550899396861531	2.48637101000475	6.57003684116602e-10	1.20888677877455e-07	1.02354258157113e-07	6125	tags=65%, list=33%, signal=44%	RPL10L/RPS26/RPL37A/RPS23/RPS15A/RPS12/RPS24/RPS3A/RPS5/RPL3/RPL7/RPLP2/RPL22/RPL26/RPL17/RPL38/RPL22L1/RPL6/RPL35A/RPL30/RPL11/RPL37/RPL18A/RPL39/RPL15/RPL41/RPL21/RPL32/RPS10/RPL10/RPL19/RPS9/RPS8/RPS13/RPS18/RPS21/RPS7/RPS4X/RPL13A/RPS6/RPL36A/RPL27A/RPL29/RPS25/RPS19/RPS11/RPSA/RPS27A/RPL24/RPL31/RPS29/RPL10A/RPL35/FAU/RSL24D1/RPL26L1
KEGG_FATTY_ACID_METABOLISM	KEGG_FATTY_ACID_METABOLISM	41	-0.50797	-2.00134	0.000202583180030801	0.0124251017085558	0.0105201089980907	3089	tags=49%, list=17%, signal=41%	ACADSB/ADH1A/ACSL6/GCDH/ACAT1/CYP4A11/CYP4A22/ACADM/ADH6/ACOX3/ACSL3/ADH4/ACSL5/ECHS1/CPT1A/ADH1B/ADH5/HADHA/HADHB/ACSL1
KEGG_PPAR_SIGNALING_PATHWAY	KEGG_PPAR_SIGNALING_PATHWAY	65	-0.446208	-1.93669	0.000167614957459021	0.0124251017085558	0.0105201089980907	2825	tags=40%, list=15%, signal=34%	ACSL6/RXRA/CYP4A11/PPARG/CYP4A22/ACADM/UCP1/RXRB/ACOX3/HMGCS2/ACSL3/ACSL5/CPT1A/PLIN1/CD36/LPL/PCK2/CYP7A1/ACOX2/FABP4/PPARA/RXRG/CYP27A1/CYP8B1/ACSL1/FABP5
KEGG_SYSTEMIC_LUPUS_ERYTHEMATOSUS	KEGG_SYSTEMIC_LUPUS_ERYTHEMATOSUS	52	-0.457898	-1.90113	0.000371692308448215	0.0170978461886179	0.0144764372764042	3266	tags=40%, list=18%, signal=33%	C6/ELANE/C8B/C4A/C4B/FCGR2A/C9/CD40/HLA-DRB5/GRIN2A/C7/CTSG/C5/HLA-DOA/HLA-DOB/C1S/C2/CD28/C1R/ACTN2/HLA-DRB1
KEGG_PROPANOATE_METABOLISM	KEGG_PROPANOATE_METABOLISM	31	-0.540165	-1.98875	0.000607244419990059	0.0223465946556342	0.018920457717585	2713	tags=42%, list=15%, signal=36%	ACAT1/SUCLA2/ABAT/ACADM/ALDH6A1/ECHS1/ACACA/HIBCH/ACSS3/ACSS1/MCEE/HADHA/LDHC
KEGG_PATHWAYS_IN_CANCER	KEGG_PATHWAYS_IN_CANCER	318	0.280687142383092	1.49364262412119	0.000876883607385127	0.0268910972931439	0.0227682059461401	3820	tags=31%, list=21%, signal=25%	FGFR1/LAMC2/CDH1/PLD1/LAMB3/CCNA1/MET/SHH/LAMA1/FGFR2/HSP90AA1/WNT7A/RALGDS/WNT6/ITGA3/TRAF4/MMP1/MECOM/RARA/BCR/WNT9A/FOS/IGF1R/NCOA4/ITGA6/GSTP1/CCDC6/HSP90AB1/ERBB2/CTNNA1/ARNT2/WNT3A/PDGFB/NFKBIA/CDK2/FZD10/HIF1A/LAMC1/DAPK1/MDM2/WNT11/PRKCG/FZD3/TGFB3/CSF2RA/HSP90B1/TPM3/VEGFA/PLCG2/CDKN1A/TGFA/FGFR3/FAS/FGF9/JUN/PGF/CCNE1/EPAS1/TCF7L1/FGF16/WNT2/WNT7B/HDAC1/JUP/WNT4/CSF3R/ITGA2/PTCH1/VHL/WN…
KEGG_ADIPOCYTOKINE_SIGNALING_PATHWAY	KEGG_ADIPOCYTOKINE_SIGNALING_PATHWAY	65	-0.408502	-1.77303	0.00119717093329221	0.0314684931036809	0.0266438042296612	2987	tags=32%, list=16%, signal=27%	PTPN11/CAMKK2/ACSL6/RXRA/AKT3/CAMKK1/RXRB/PRKAG2/ACSL3/PRKCQ/ACSL5/CPT1A/JAK2/CD36/PCK2/MAPK10/PPARA/IRS4/RXRG/ACSL1/PRKAB2
KEGG_STEROID_HORMONE_BIOSYNTHESIS	KEGG_STEROID_HORMONE_BIOSYNTHESIS	48	-0.43173	-1.7615	0.00186286130673528	0.0389500564879103	0.0329783086968577	3022	tags=40%, list=16%, signal=33%	SRD5A3/CYP7B1/AKR1C3/CYP3A43/HSD11B1/HSD3B2/HSD11B2/UGT1A8/HSD17B1/AKR1C4/CYP19A1/HSD17B2/AKR1D1/HSD17B6/CYP7A1/CYP11A1/CYP3A5/SULT1E1/CYP3A4
KEGG_VALINE_LEUCINE_AND_ISOLEUCINE_DEGRADATION	KEGG_VALINE_LEUCINE_AND_ISOLEUCINE_DEGRADATION	43	-0.441347	-1.75079	0.00190516580647387	0.0389500564879103	0.0329783086968577	2104	tags=35%, list=11%, signal=31%	ACADSB/ACAT1/ABAT/ACADM/DLD/ALDH6A1/HMGCS2/ECHS1/HIBCH/OXCT1/MCEE/HADHA/HADHB/BCKDHB/MCCC1
KEGG_VASCULAR_SMOOTH_MUSCLE_CONTRACTION	KEGG_VASCULAR_SMOOTH_MUSCLE_CONTRACTION	110	-0.338512	-1.62688	0.00259125511666001	0.0476790941465442	0.040369027080598	2778	tags=26%, list=15%, signal=23%	PPP1R14A/PPP1CB/KCNMB2/CYP4A11/PPP1R12A/MYL9/PLCB4/CYP4A22/PRKACB/ADCY3/PRKX/CALCRL/MYLK/ACTA2/PLA2G4E/PRKCQ/AVPR1A/MYH11/GNAQ/ADRA1D/PLA2G2D/NPR1/KCNMB1/PRKG1/PLA2G2A/RAMP2/CALD1/ACTG2/ROCK2
KEGG_PHOSPHATIDYLINOSITOL_SIGNALING_SYSTEM	KEGG_PHOSPHATIDYLINOSITOL_SIGNALING_SYSTEM	76	-0.36486	-1.63176	0.00430548420552847	0.0720190085288399	0.0609771925759057	5037	tags=46%, list=27%, signal=34%	PIK3R2/OCRL/PIK3R5/PIK3C2G/ITPR3/PLCB2/ITPR1/PIK3CA/PLCE1/CDS1/PRKCB/INPP5K/PIK3C3/INPP4B/PIK3CG/ITPKB/INPP5E/CDS2/IPPK/PLCD4/PI4KB/PIKFYVE/DGKD/PLCB4/DGKB/PIP4K2A/INPPL1/PIK3R1/ITPKA/IMPA1/DGKI/SYNJ1/PIP5K1B/INPP5A/DGKG
KEGG_CALCIUM_SIGNALING_PATHWAY	KEGG_CALCIUM_SIGNALING_PATHWAY	175	-0.285317	-1.46785	0.00545735646362689	0.0836794657756124	0.0708498909312965	3130	tags=26%, list=17%, signal=22%	PPP3R1/P2RX2/AGTR1/BST1/ITPKB/ATP2B4/GRIN1/CACNA1E/GNAL/PLCD4/GRIN2A/F2R/PDE1B/PLCB4/PTGFR/PTGER3/PRKACB/ADCY3/PRKX/MYLK/ADRB1/TRHR/PDGFRA/CHRM5/NTSR1/AVPR1A/P2RX7/ITPKA/TBXA2R/GNAQ/HTR2A/P2RX3/ADRA1D/PPP3CA/PHKA2/CAMK2A/TACR2/NOS2/P2RX5/PPP3CC/CAMK2D/TRPC1/ATP2A3/RYR3/RYR2
KEGG_BETA_ALANINE_METABOLISM	KEGG_BETA_ALANINE_METABOLISM	22	-0.522979	-1.7656	0.00773469520908971	0.0837626007188617	0.0709202797848486	2167	tags=41%, list=12%, signal=36%	UPB1/ABAT/ACADM/AOC3/ECHS1/HIBCH/SMS/GAD1/HADHA
KEGG_MATURITY_ONSET_DIABETES_OF_THE_YOUNG	KEGG_MATURITY_ONSET_DIABETES_OF_THE_YOUNG	20	0.551194710769717	1.75562792558187	0.00788403550180183	0.0837626007188617	0.0709202797848486	2007	tags=45%, list=11%, signal=40%	HNF4G/HNF1B/NKX6-1/HES1/FOXA3/MAFA/NEUROG3/PAX6/HNF1A
KEGG_DNA_REPLICATION	KEGG_DNA_REPLICATION	36	0.471578601694321	1.75432553793234	0.00617252401584835	0.0837626007188617	0.0709202797848486	4924	tags=50%, list=27%, signal=37%	RFC3/RFC2/MCM7/POLD1/POLD3/POLA1/DNA2/RPA2/RPA1/RFC4/RFC5/SSBP1/MCM5/RFC1/MCM4/POLE3/POLA2/POLD4
KEGG_PRIMARY_BILE_ACID_BIOSYNTHESIS	KEGG_PRIMARY_BILE_ACID_BIOSYNTHESIS	16	-0.554526	-1.75273	0.00819416746162777	0.0837626007188617	0.0709202797848486	1465	tags=44%, list=8%, signal=40%	AKR1C4/AKR1D1/CYP46A1/CYP7A1/ACOX2/CYP27A1/CYP8B1
KEGG_O_GLYCAN_BIOSYNTHESIS	KEGG_O_GLYCAN_BIOSYNTHESIS	28	0.495125134551267	1.72947187383123	0.00774779258044961	0.0837626007188617	0.0709202797848486	3551	tags=43%, list=19%, signal=35%	GALNT5/GALNT14/GALNT7/B3GNT6/GCNT1/GALNT6/C1GALT1C1/GALNT9/GALNTL6/B4GALT5/GALNT10/GALNT12
KEGG_TYROSINE_METABOLISM	KEGG_TYROSINE_METABOLISM	39	-0.415529	-1.61805	0.00753984798853929	0.0837626007188617	0.0709202797848486	5113	tags=51%, list=28%, signal=37%	ADH7/HGD/FAH/METTL2B/GOT1/AOX1/ADH1A/LCMT2/ALDH3B2/MAOB/ADH6/ALDH1A3/LCMT1/DCT/AOC3/PNMT/ADH4/ADH1B/ADH5/TPO
KEGG_NOD_LIKE_RECEPTOR_SIGNALING_PATHWAY	KEGG_NOD_LIKE_RECEPTOR_SIGNALING_PATHWAY	58	0.392322873877496	1.63180431815016	0.00904939221157164	0.0876362193120622	0.0742000026211969	3861	tags=40%, list=21%, signal=31%	HSP90AA1/MEFV/RIPK2/TAB2/HSP90AB1/NFKBIA/IL18/CXCL2/IL1B/HSP90B1/TRIP6/MAPK13/BIRC2/MAPK3/RELA/NFKB1/IL6/CCL11/CXCL1/MAPK9/NFKBIB/CASP8/NLRP3
KEGG_PRIMARY_IMMUNODEFICIENCY	KEGG_PRIMARY_IMMUNODEFICIENCY	35	-0.437131	-1.66374	0.0126683056378277	0.0971236765566793	0.0822328611578292	5300	tags=60%, list=29%, signal=43%	DCLRE1C/CD40LG/CD8A/PTPRC/JAK3/CD3E/TAP1/CD3D/IL2RG/ZAP70/RFXAP/TNFRSF13C/CD40/LCK/BTK/RAG2/CD4/TNFRSF13B/TAP2/CD79A/CD19
KEGG_BUTANOATE_METABOLISM	KEGG_BUTANOATE_METABOLISM	33	-0.443559	-1.65689	0.0115807459149018	0.0971236765566793	0.0822328611578292	3220	tags=39%, list=18%, signal=33%	ACSM1/PDHA2/ACAT1/ACSM3/BDH1/ABAT/HMGCS2/ECHS1/ACSM2A/OXCT1/GAD1/HADHA/ACSM5
KEGG_DRUG_METABOLISM_OTHER_ENZYMES	KEGG_DRUG_METABOLISM_OTHER_ENZYMES	46	-0.398581	-1.61494	0.0107553482011405	0.0971236765566793	0.0822328611578292	4509	tags=41%, list=25%, signal=31%	UGT1A5/UGT1A1/UCK1/UPP2/UGT1A4/DPYD/GMPS/CYP3A43/TK2/UPB1/IMPDH1/CYP2A6/UCK2/UGT1A8/CES1/CYP3A5/NAT2/HPRT1/CYP3A4
KEGG_COMPLEMENT_AND_COAGULATION_CASCADES	KEGG_COMPLEMENT_AND_COAGULATION_CASCADES	66	-0.357746	-1.5605	0.0126575064294191	0.0971236765566793	0.0822328611578292	3813	tags=44%, list=21%, signal=35%	C1QA/CPB2/SERPINE1/TFPI/FGA/F5/CD46/C6/C8B/C4A/C4B/CFD/F7/SERPING1/C9/SERPINF2/SERPINC1/FGG/F2R/C7/SERPIND1/F8/C5/F10/CD59/C1S/C2/C1R/MASP1
KEGG_PEROXISOME	KEGG_PEROXISOME	77	-0.333012	-1.4981	0.0126290625947463	0.0971236765566793	0.0822328611578292	3068	tags=30%, list=17%, signal=25%	PIPOX/PEX11A/ACSL6/PEX16/SLC25A17/MVK/ACOT8/PEX6/ACOX3/CRAT/ACSL3/ACSL5/PEX11B/DHRS4/ACOX2/NOS2/NUDT19/PEX3/PXMP4/IDH1/PEX12/ABCD1/ACSL1

## Sheet: 02.IL1A_result
ID	Description	setSize	enrichmentScore	NES	pvalue	p.adjust	qvalue	rank	leading_edge	core_enrichment
KEGG_CELL_CYCLE	KEGG_CELL_CYCLE	124	0.420659364371406	2.00544007475729	2.0385661055762e-06	0.00037509616342602	0.000309003704424182	4280	tags=44%, list=23%, signal=34%	CCNA1/CDKN1A/MDM2/CDK2/CCNE1/ORC6/RB1/HDAC1/MCM4/BUB3/GADD45A/PRKDC/YWHAH/PCNA/TTK/CDC6/YWHAQ/WEE1/BUB1B/SMAD2/CHEK1/GADD45B/ORC1/MAD2L1/CDC25C/ANAPC7/RBX1/CCNB1/MCM3/CDKN2B/TGFB3/CCNB2/YWHAZ/MCM2/CDK4/MAD2L2/BUB1/CDK1/MCM6/YWHAE/CDKN2D/ZBTB17/E2F5/ANAPC5/CDC20/CDK7/RAD21/CDC7/ESPL1/CDC27/E2F2/ORC2/PTTG1/DBF4/CCNE2
KEGG_SYSTEMIC_LUPUS_ERYTHEMATOSUS	KEGG_SYSTEMIC_LUPUS_ERYTHEMATOSUS	52	-0.473919	-1.98306	0.000171200430665146	0.0157504396211934	0.0129751905346216	4395	tags=48%, list=24%, signal=37%	FCGR2A/GRIN2A/C1QC/FCGR3A/HLA-DPB1/C1QB/GRIN2B/HLA-DRB5/C1QA/HLA-DPA1/CTSG/HLA-DQA1/C8B/HLA-DRB1/HLA-DOB/HLA-DOA/C4A/C4B/C5/ELANE/C1R/C7/ACTN2/C2/C1S
KEGG_P53_SIGNALING_PATHWAY	KEGG_P53_SIGNALING_PATHWAY	65	0.437673118220863	1.87704722934177	0.00096636500561245	0.0548159795475193	0.0451573286890319	3436	tags=37%, list=19%, signal=30%	PMAIP1/BBC3/TNFRSF10B/CDKN1A/MDM2/CDK2/CCNE1/SERPINB5/TP73/ZMAT3/GADD45A/SESN3/CYCS/STEAP3/FAS/CHEK1/GADD45B/RRM2/CASP3/CCNB1/CCNB2/PERP/CDK4/CDK1
KEGG_DNA_REPLICATION	KEGG_DNA_REPLICATION	36	0.490030807769928	1.8368658541938	0.0012438613991128	0.0548159795475193	0.0451573286890319	6236	tags=67%, list=34%, signal=44%	POLA1/MCM4/RFC3/DNA2/POLD1/PCNA/POLA2/POLD3/RPA1/MCM3/SSBP1/RFC2/MCM2/MCM6/FEN1/RFC4/POLD4/POLD2/MCM7/POLE2/POLE/POLE3/RNASEH2A/LIG1
KEGG_INTESTINAL_IMMUNE_NETWORK_FOR_IGA_PRODUCTION	KEGG_INTESTINAL_IMMUNE_NETWORK_FOR_IGA_PRODUCTION	44	-0.457572	-1.83407	0.00148956466161737	0.0548159795475193	0.0451573286890319	4248	tags=45%, list=23%, signal=35%	IL15RA/LTBR/HLA-DPB1/TNFRSF17/HLA-DRB5/TGFB1/TNFRSF13B/HLA-DPA1/CXCL12/HLA-DQA1/CXCR4/TNFRSF13C/HLA-DRB1/HLA-DOB/ITGA4/HLA-DOA/CCR10/MADCAM1/TNFSF13B/IL15
KEGG_VASCULAR_SMOOTH_MUSCLE_CONTRACTION	KEGG_VASCULAR_SMOOTH_MUSCLE_CONTRACTION	110	-0.338952	-1.63949	0.00197244539052518	0.0604883253094388	0.0498301993395835	3676	tags=35%, list=20%, signal=28%	PLA2G4A/MYLK/ADRA1D/RAMP1/ITPR1/ADCY1/CYP4A11/ROCK2/PRKCQ/PLA2G5/CYP4A22/PLA2G6/PRKACB/PLCB4/PRKCE/PLA2G2D/MYL9/PLCB2/PPP1R14A/GNAQ/ACTA2/KCNMB2/BRAF/PRKX/PRKG1/ARHGEF11/ADCY5/MYH11/PLA2G2A/PPP1R12A/NPR1/ACTG2/KCNMB1/CALCRL/ADCY3/CALD1/AVPR1A/RAMP2
KEGG_ADIPOCYTOKINE_SIGNALING_PATHWAY	KEGG_ADIPOCYTOKINE_SIGNALING_PATHWAY	65	-0.397414	-1.73654	0.00237032634906496	0.0623057211754217	0.0513273675586998	3230	tags=29%, list=18%, signal=24%	ACSL3/IRS2/PRKCQ/PRKAG2/MAPK10/RXRB/ADIPOR2/CD36/ACACB/RXRG/JAK2/PCK2/AKT3/ACSL1/PPARA/IRS4/ACSL5/CAMKK1/PRKAB2

## Sheet: 03.POF1B_result
ID	Description	setSize	enrichmentScore	NES	pvalue	p.adjust	qvalue	rank	leading_edge	core_enrichment
KEGG_FATTY_ACID_METABOLISM	KEGG_FATTY_ACID_METABOLISM	41	-0.50917	-2.03307	0.000119916972254198	0.0129757566591503	0.0108378745551255	2827	tags=44%, list=15%, signal=37%	ADH4/ECI2/ECHS1/CPT2/ACADM/ADH6/GCDH/CYP4A11/ACAT1/HADHB/ADH1A/ACSL5/CYP4A22/ACOX3/ADH1B/HADHA/ADH5/ACSL1
KEGG_DNA_REPLICATION	KEGG_DNA_REPLICATION	36	0.544444593380963	2.01360071630166	0.000197909584975888	0.0129757566591503	0.0108378745551255	6279	tags=75%, list=34%, signal=49%	POLD1/POLA1/MCM2/MCM4/RPA1/MCM3/RFC4/MCM6/POLA2/POLE3/POLD2/DNA2/MCM7/FEN1/PCNA/RFC2/RFC3/MCM5/POLD3/RFC5/SSBP1/RNASEH2A/RFC1/RPA2/POLD4/POLE/LIG1
KEGG_VALINE_LEUCINE_AND_ISOLEUCINE_DEGRADATION	KEGG_VALINE_LEUCINE_AND_ISOLEUCINE_DEGRADATION	43	-0.489988	-1.98887	0.000211561249877451	0.0129757566591503	0.0108378745551255	2468	tags=37%, list=13%, signal=32%	ECHS1/ACADM/MCCC1/DBT/OXCT1/OXCT2/HMGCL/AOX1/ACAT1/HADHB/ABAT/HMGCS2/ALDH6A1/MCEE/HADHA/BCKDHB
KEGG_BUTANOATE_METABOLISM	KEGG_BUTANOATE_METABOLISM	33	-0.523694	-1.99212	0.000523940550251557	0.0192810122492573	0.0161042779656268	2972	tags=45%, list=16%, signal=38%	BDH1/ECHS1/OXCT1/OXCT2/PDHA2/GAD1/HMGCL/ACSM1/ACSM3/ACAT1/ACSM2A/ACSM5/ABAT/HMGCS2/HADHA
KEGG_CELL_CYCLE	KEGG_CELL_CYCLE	124	0.363660880981986	1.71028750384158	0.00048873176070489	0.0192810122492573	0.0161042779656268	5432	tags=45%, list=30%, signal=32%	CCNA1/GADD45A/WEE1/RB1/YWHAQ/PRKDC/ORC6/RBX1/ORC2/HDAC1/MCM2/MAD2L1/MCM4/SMAD2/MCM3/CDK2/MDM2/CDC7/E2F5/MCM6/ORC1/CCND3/CDKN2B/BUB3/BUB1B/MCM7/CHEK1/CCNE1/CDKN1A/CDK4/PCNA/ANAPC7/CCNB1/CDC27/CDK7/YWHAH/MCM5/CDC25C/MAD2L2/TGFB3/FZR1/SMC3/TTK/CCNE2/PKMYT1/ZBTB17/BUB1/CDC6/E2F1/SMC1A/CDK1/CCNB2/ANAPC13/CDC23/ORC4/ESPL1
KEGG_SYSTEMIC_LUPUS_ERYTHEMATOSUS	KEGG_SYSTEMIC_LUPUS_ERYTHEMATOSUS	52	-0.424367	-1.80027	0.00115982054078874	0.0304867113578755	0.0254637291661889	4743	tags=50%, list=26%, signal=37%	CD28/GRIN2B/FCGR2A/C9/C6/HLA-DRB1/C4A/C4B/HLA-DRB5/HLA-DOA/C1QA/C1QC/GRIN2A/CTSG/C1QB/C5/FCGR3A/ELANE/C8B/HLA-DPB1/C1R/HLA-DOB/C7/C2/ACTN2/C1S
KEGG_PATHWAYS_IN_CANCER	KEGG_PATHWAYS_IN_CANCER	318	0.280384353229029	1.47272952262988	0.00109383935248776	0.0304867113578755	0.0254637291661889	3322	tags=26%, list=18%, signal=22%	LAMC2/LAMA1/TRAF4/FGFR1/LAMB3/SHH/FGFR2/FZD10/CYCS/PLD1/CCNA1/CDH1/PGF/HSP90AA1/WNT3A/RALGDS/BCR/FGF20/CTNNA1/ITGA3/MET/FGF5/MMP1/MAP2K1/RB1/WNT9A/ERBB2/MSH2/CCDC6/WNT11/HIF1A/MECOM/GSTP1/FAS/RBX1/WNT7A/MSH3/NCOA4/PDGFB/HDAC1/ARNT2/ITGA6/DAPK1/BIRC2/PIK3CB/FGFR3/TRAF3/RARA/SMAD2/WNT6/HSP90AB1/CDK2/MDM2/VEGFA/IGF1R/PIK3R3/HGF/LAMA5/DCC/VHL/LAMB4/CTBP2/WNT4/EPAS1/FZD3/CDKN2B/PLCG2/FGF9/BMP4/BRCA2/I…
KEGG_PROPANOATE_METABOLISM	KEGG_PROPANOATE_METABOLISM	31	-0.501555	-1.88168	0.00189790299197675	0.0410014072771855	0.0342460266731641	3331	tags=42%, list=18%, signal=34%	ACACB/SUCLA2/LDHB/ECHS1/ACADM/ACAT1/ACACA/LDHC/ABAT/ALDH6A1/MCEE/ACSS3/HADHA
KEGG_PPAR_SIGNALING_PATHWAY	KEGG_PPAR_SIGNALING_PATHWAY	65	-0.398614	-1.77119	0.00200550361681886	0.0410014072771855	0.0342460266731641	2484	tags=35%, list=14%, signal=31%	RXRB/ILK/CPT2/ACADM/CYP7A1/CYP8B1/CYP4A11/LPL/PCK2/PPARA/PLIN1/ACSL5/CYP4A22/ACOX3/RXRG/ACOX2/HMGCS2/CD36/FABP5/CYP27A1/PPARG/FABP4/ACSL1
KEGG_ADIPOCYTOKINE_SIGNALING_PATHWAY	KEGG_ADIPOCYTOKINE_SIGNALING_PATHWAY	65	-0.393235	-1.74729	0.00241851188982132	0.0445006187727123	0.0371687090435698	3993	tags=37%, list=22%, signal=29%	LEPR/ADIPOR2/PRKAG1/ACSL3/G6PC2/IRS2/JAK2/ACACB/PRKAB1/RXRB/NPY/MAPK10/AKT3/PRKAG2/PCK2/PRKCQ/PPARA/CAMKK1/ACSL5/RXRG/CD36/IRS4/PRKAB2/ACSL1
KEGG_STEROID_HORMONE_BIOSYNTHESIS	KEGG_STEROID_HORMONE_BIOSYNTHESIS	48	-0.422841	-1.74887	0.00297559494562724	0.0497735881814011	0.041572905460438	3257	tags=42%, list=18%, signal=34%	AKR1C3/UGT1A5/UGT1A1/SRD5A3/HSD11B1/CYP3A5/UGT1A3/CYP7A1/HSD17B2/AKR1C4/CYP19A1/CYP3A43/STS/HSD17B6/HSD11B2/HSD17B1/CYP11A1/CYP3A4/SULT1E1/AKR1D1
KEGG_TYROSINE_METABOLISM	KEGG_TYROSINE_METABOLISM	39	-0.456832	-1.82561	0.00363136410345004	0.0556809162529006	0.0465069437810268	2883	tags=38%, list=16%, signal=32%	METTL6/ADH4/ALDH3B2/ALDH1A3/PNMT/TPO/ADH6/AOX1/DCT/ADH1A/MAOB/LCMT1/AOC3/ADH1B/ADH5
KEGG_N_GLYCAN_BIOSYNTHESIS	KEGG_N_GLYCAN_BIOSYNTHESIS	46	0.430654707065942	1.69480192034878	0.00397499835450434	0.0562615151714461	0.046991883381185	5012	tags=52%, list=27%, signal=38%	B4GALT1/MGAT3/ALG1/MGAT4A/TUSC3/MGAT5B/MGAT5/MGAT2/MAN2A1/FUT8/DDOST/MAN2A2/B4GALT3/STT3B/ALG5/RPN2/DPAGT1/RPN1/ALG2/ST6GAL1/DAD1/MGAT1/DOLPP1/GANAB
KEGG_PHOSPHATIDYLINOSITOL_SIGNALING_SYSTEM	KEGG_PHOSPHATIDYLINOSITOL_SIGNALING_SYSTEM	76	-0.349489	-1.60689	0.00471107091620333	0.0619169320415295	0.0517155153207283	4910	tags=51%, list=27%, signal=38%	PIP5K1C/PI4KA/INPP5B/ITPKB/INPP4A/ITPR3/PIK3CG/PIK3R5/DGKE/ITPR1/IMPA1/PIP4K2C/INPP5K/PLCZ1/CDIPT/PIK3R2/OCRL/PIK3C2A/PIK3C2G/CDS1/PLCE1/PLCB4/SYNJ1/IPPK/PI4KB/CDS2/ITPKA/DGKB/PIK3C3/PIKFYVE/DGKD/PIK3R1/INPPL1/INPP5A/DGKI/PLCD4/PIP4K2A/DGKG/PIP5K1B
KEGG_CYTOKINE_CYTOKINE_RECEPTOR_INTERACTION	KEGG_CYTOKINE_CYTOKINE_RECEPTOR_INTERACTION	243	0.278074948302269	1.41907379312343	0.00542220131819431	0.0665123361698502	0.0555537819267628	2202	tags=20%, list=12%, signal=18%	BMPR1B/IL1A/PF4V1/IL1R2/TNFRSF12A/RELT/TNFSF15/CXCL16/CSF2/IL4R/CX3CL1/CSF1/TNFRSF10B/IFNLR1/TNFRSF11A/MET/INHBB/IL6R/IL19/TNFRSF21/TNFRSF10C/TNFRSF10D/CSF3/CCR9/IL23A/CXCL3/CCL15/IL1B/CXCL1/FAS/CCL24/PDGFB/TNFRSF1B/TNFSF9/CXCL5/IL1RAP/IL17A/LEP/IFNA8/CCL7/OSMR/VEGFA/IL11/IL5/ACVR2B/PDGFC/HGF/IL18
KEGG_VASCULAR_SMOOTH_MUSCLE_CONTRACTION	KEGG_VASCULAR_SMOOTH_MUSCLE_CONTRACTION	110	-0.303644	-1.49603	0.00684124134309349	0.0786742754455751	0.0657119234270822	3794	tags=32%, list=21%, signal=25%	RAMP1/BRAF/ARHGEF11/PLA2G4E/ADCY5/GNAQ/KCNMB4/ROCK2/ADCY1/PRKACB/MYLK/PLA2G2D/PLA2G4A/PLCB4/ADCY3/CALCRL/MYL9/CYP4A11/NPR1/KCNMB1/ACTA2/PRKG1/PPP1R12A/ADRA1D/PRKX/PRKCQ/PPP1R14A/CALD1/PLA2G2A/CYP4A22/KCNMB2/MYH11/AVPR1A/ACTG2/RAMP2
KEGG_RETINOL_METABOLISM	KEGG_RETINOL_METABOLISM	56	-0.387475	-1.65985	0.00756096866233847	0.0818363666982517	0.0683530293932766	3459	tags=39%, list=19%, signal=32%	DHRS9/UGT1A5/UGT1A1/CYP3A5/CYP2A7/ADH4/CYP2C9/PNPLA4/UGT1A3/AWAT2/ADH6/CYP4A11/RETSAT/CYP26A1/ADH1A/CYP3A43/CYP4A22/DHRS4/DHRS4L2/ADH1B/CYP3A4/ADH5
KEGG_MATURITY_ONSET_DIABETES_OF_THE_YOUNG	KEGG_MATURITY_ONSET_DIABETES_OF_THE_YOUNG	20	0.53549911442886	1.71245822576378	0.00849760651398755	0.0868644221429838	0.0725526638036364	2786	tags=50%, list=15%, signal=42%	NKX6-1/HNF4G/HES1/MAFA/HNF1B/FOXA3/NKX2-2/HNF4A/NEUROG3/HNF1A

## Sheet: 04.ICAM4_result
ID	Description	setSize	enrichmentScore	NES	pvalue	p.adjust	qvalue	rank	leading_edge	core_enrichment
KEGG_PPAR_SIGNALING_PATHWAY	KEGG_PPAR_SIGNALING_PATHWAY	65	-0.451726	-1.95929	6.58289496616252e-05	0.012112526737739	0.0104633383146373	2518	tags=40%, list=14%, signal=35%	CYP7A1/CYP4A11/PPARG/ACOX3/CD36/ACSL5/CYP4A22/CPT1A/PPARA/UCP1/ACSL3/RXRA/HMGCS2/PLIN1/ILK/LPL/CYP27A1/RXRB/FADS2/RXRG/PCK2/ACOX2/FABP4/CYP8B1/FABP5/ACSL1
KEGG_CYTOKINE_CYTOKINE_RECEPTOR_INTERACTION	KEGG_CYTOKINE_CYTOKINE_RECEPTOR_INTERACTION	243	0.316977198756188	1.60335661661184	0.000145133781054126	0.0133523078569796	0.0115343162837752	3430	tags=29%, list=19%, signal=24%	IL4R/CXCL16/TNFSF9/BMPR1B/CX3CL1/MET/IFNLR1/IL1R2/IL23A/TNFRSF12A/IL1A/IL1RAP/TNFRSF11A/CXCL3/TNFSF15/IL18/CXCR2/CXCL5/RELT/EPOR/TNFRSF10C/CSF3/IL11/TNFRSF10B/IL1B/CXCL2/TNFRSF10D/IL6R/CLCF1/CSF2/INHBA/CSF1/IL19/INHBB/PDGFB/IL24/CCL24/TNFRSF21/CSF2RA/IL5/PF4V1/OSMR/ACVR2B/TNFSF10/CSF3R/VEGFA/CXCL14/FAS/IFNA2/CCL15/IL9R/TNFRSF1B/OSM/IL17B/CCL11/IL6/CXCL1/PPBP/TNFSF13/BMP2/TNFRSF18/TNFSF11/IL17A/LE…
KEGG_FATTY_ACID_METABOLISM	KEGG_FATTY_ACID_METABOLISM	41	-0.503211	-1.97301	0.000318840991894999	0.0195555808362266	0.0168929788688227	3559	tags=49%, list=19%, signal=39%	ADH1A/ECI2/ALDH1B1/ACADM/CYP4A11/ACOX3/ACSL5/CYP4A22/CPT1A/ADH4/ACSL3/ADH6/ADH1B/ACAT1/ADH5/GCDH/ECHS1/HADHA/HADHB/ACSL1
KEGG_DNA_REPLICATION	KEGG_DNA_REPLICATION	36	0.530309715929706	1.94307179846206	0.000495080803615246	0.0227737169663013	0.0196729477226058	5278	tags=56%, list=29%, signal=40%	POLD1/RFC3/RPA2/DNA2/RFC4/MCM5/RFC2/MCM7/RFC1/RFC5/POLA1/POLD3/RPA1/PRIM1/MCM4/POLE3/POLE/POLD4/LIG1/POLA2
KEGG_ADIPOCYTOKINE_SIGNALING_PATHWAY	KEGG_ADIPOCYTOKINE_SIGNALING_PATHWAY	65	-0.402923	-1.74761	0.00113803562665427	0.0418797110608771	0.0361775536052199	2837	tags=31%, list=15%, signal=26%	CAMKK2/POMC/PRKAG1/ADIPOR2/PRKAG2/CD36/ACSL5/CPT1A/PPARA/CAMKK1/ACSL3/RXRA/PTPN11/RXRB/RXRG/IRS4/PCK2/PRKCQ/PRKAB2/ACSL1
KEGG_PROPANOATE_METABOLISM	KEGG_PROPANOATE_METABOLISM	31	-0.495906	-1.82406	0.00200118790875819	0.0526026536016439	0.0454405074018777	3080	tags=45%, list=17%, signal=38%	ALDH1B1/ACADM/ABAT/ALDH6A1/ACSS3/HIBCH/SUCLA2/ACSS1/ACAT1/ECHS1/ACACA/LDHC/MCEE/HADHA
KEGG_PATHWAYS_IN_CANCER	KEGG_PATHWAYS_IN_CANCER	318	0.283824416014891	1.47846148312433	0.00177590199939471	0.0526026536016439	0.0454405074018777	3039	tags=25%, list=17%, signal=21%	PLD1/FGFR1/SHH/MET/LAMC2/LAMB3/CDH1/ITGA3/MMP1/RALGDS/TRAF4/LAMA1/FGFR2/IGF1R/WNT3A/CCDC6/CCNA1/DAPK1/FOS/WNT9A/WNT7A/RUNX1/HSP90AA1/WNT6/MECOM/FZD10/HIF1A/CTNNA1/WNT7B/FZD3/ARNT2/ITGA2/FGF20/TGFA/CDKN2B/ERBB2/PDGFB/EPAS1/LAMC1/FGF9/MDM2/CSF2RA/CTBP2/BIRC2/NFKBIA/BCR/ITGA6/WNT11/CDKN1A/CDK2/GSTP1/JUN/JUP/PRKCG/CSF3R/VEGFA/NCOA4/RB1/FGF5/PGF/MAPK9/FAS/RARA/MSH2/FGF19/PML/HSP90AB1/IL6/FGF18/MSH3/BR…
KEGG_GLYOXYLATE_AND_DICARBOXYLATE_METABOLISM	KEGG_GLYOXYLATE_AND_DICARBOXYLATE_METABOLISM	15	-0.640147	-1.98372	0.00233713763555085	0.0530019279687341	0.0457854183253939	3155	tags=47%, list=17%, signal=39%	AFMID/MDH2/PGP/CS/MDH1/MTHFD2/ACO1
KEGG_CITRATE_CYCLE_TCA_CYCLE	KEGG_CITRATE_CYCLE_TCA_CYCLE	30	-0.499706	-1.81913	0.00273643443892139	0.0530019279687341	0.0457854183253939	3458	tags=37%, list=19%, signal=30%	PDHA2/MDH2/DLD/PC/SUCLA2/IDH1/CS/PCK2/MDH1/DLAT/ACO1
KEGG_PHOSPHATIDYLINOSITOL_SIGNALING_SYSTEM	KEGG_PHOSPHATIDYLINOSITOL_SIGNALING_SYSTEM	76	-0.354973	-1.58501	0.00288053956351816	0.0530019279687341	0.0457854183253939	2700	tags=29%, list=15%, signal=25%	OCRL/ITPKB/INPP5E/PIK3C2G/PIK3R2/PLCD4/DGKD/DGKB/PI4KB/PIKFYVE/IMPA1/INPP4B/PIK3R1/IPPK/ITPKA/DGKG/INPP5A/PIP4K2A/DGKI/SYNJ1/PIP5K1B/INPPL1
KEGG_MATURITY_ONSET_DIABETES_OF_THE_YOUNG	KEGG_MATURITY_ONSET_DIABETES_OF_THE_YOUNG	20	0.589135199958786	1.85233101737275	0.00387823983784533	0.0648723754694129	0.0560396378482914	3433	tags=60%, list=19%, signal=49%	HNF4G/FOXA3/MAFA/HES1/HNF1B/NKX6-1/NEUROG3/ONECUT1/HNF4A/HNF1A/NKX2-2/PAX6
KEGG_PEROXISOME	KEGG_PEROXISOME	77	-0.36462	-1.63287	0.00439674424062342	0.0674167450228924	0.0582375772222926	2899	tags=31%, list=16%, signal=26%	DAO/PEX16/PEX11B/FAR2/PEX12/ACOX3/PEX6/ACSL5/PEX3/MVK/MPV17/ACSL3/PIPOX/DHRS4/NOS2/CRAT/ACOT8/IDH1/SLC25A17/PXMP4/ACOX2/ABCD1/NUDT19/ACSL1
KEGG_TYROSINE_METABOLISM	KEGG_TYROSINE_METABOLISM	39	-0.438911	-1.70905	0.00484986911096384	0.0676483372700787	0.0584376368866241	3763	tags=46%, list=20%, signal=37%	METTL2B/ADH1A/GOT1/DCT/AOX1/MAOB/FAH/LCMT1/ALDH3B2/ALDH1A3/ADH4/LCMT2/TPO/ADH6/ADH1B/PNMT/ADH5/AOC3
KEGG_RIBOSOME	KEGG_RIBOSOME	86	0.366804517677811	1.62404244421997	0.00514715609663643	0.0676483372700787	0.0584376368866241	7654	tags=56%, list=42%, signal=33%	RPL10L/RPL37A/RPS26/RPS23/RPL6/RPS12/RPS15A/RPS5/RPL3/RPS3A/RPL7/RPL17/RPS6/RPS21/RPS24/RPL15/RPL22/RPS9/RPL22L1/RPL35A/RPL41/RPL21/RPS20/RPLP2/RPL39/RPS10/RPL38/RPL18A/RPL34/RPL13A/RPL5/RSL24D1/RPL26/RPS4X/RPL30/RPS13/RPSA/RPS25/RPL10/RPS7/RPS27A/RPL31/RPL11/RPLP1/RPS18/RPS29/RPL4/RPL36A
KEGG_VALINE_LEUCINE_AND_ISOLEUCINE_DEGRADATION	KEGG_VALINE_LEUCINE_AND_ISOLEUCINE_DEGRADATION	43	-0.435851	-1.72739	0.00626687327129376	0.0720690426198783	0.0622564384187736	3080	tags=37%, list=17%, signal=31%	ALDH1B1/ACADM/ABAT/AOX1/DLD/ALDH6A1/HIBCH/OXCT1/HMGCS2/ACAT1/BCKDHB/ECHS1/MCEE/HADHA/HADHB/MCCC1
KEGG_PATHOGENIC_ESCHERICHIA_COLI_INFECTION	KEGG_PATHOGENIC_ESCHERICHIA_COLI_INFECTION	54	-0.391771	-1.63254	0.00617253935307463	0.0720690426198783	0.0622564384187736	4106	tags=41%, list=22%, signal=32%	ARPC3/ARPC2/ARPC4/CD14/TUBB/ACTB/TUBB6/ARPC1B/CDC42/LY96/CTTN/TUBA3D/ARPC5/FYN/TLR4/TUBB4A/TUBB2B/TUBA8/ROCK2/TUBA3E/TUBAL3/TUBB2A

## Sheet: 05.CX3CL1_result
ID	Description	setSize	enrichmentScore	NES	pvalue	p.adjust	qvalue	rank	leading_edge	core_enrichment
KEGG_CYTOKINE_CYTOKINE_RECEPTOR_INTERACTION	KEGG_CYTOKINE_CYTOKINE_RECEPTOR_INTERACTION	243	0.363626891315775	1.7644645508888	7.0057106956442e-06	0.00128905076799853	0.00107666711743585	3393	tags=30%, list=18%, signal=24%	CX3CL1/TNFSF15/CXCL16/TNFRSF21/TNFRSF10D/INHBA/TNFRSF12A/IL11/TNFSF9/IL4R/RELT/IL1R2/TNFRSF10C/TNFRSF18/CXCL14/CCR3/IFNLR1/IL23A/OSMR/TNFSF12/IL1A/ACVR2B/BMPR1B/TNFSF11/PDGFB/IL19/IL1RAP/MET/IL18/CSF1/IL1B/IL17A/LEP/IFNA8/CCL7/PF4V1/IL9R/CXCR2/CSF2RA/TNFRSF14/CXCR6/CCL24/IL18R1/CXCL3/PPBP/IL10/IL7R/EPOR/IFNAR1/CXCL5/IL26/IL7/CXCL1/TNFRSF11B/IL21R/LTA/HGF/CCL3/CXCL2/TGFBR2/TNFRSF10B/CLCF1/TNFRSF11…
KEGG_VALINE_LEUCINE_AND_ISOLEUCINE_DEGRADATION	KEGG_VALINE_LEUCINE_AND_ISOLEUCINE_DEGRADATION	43	-0.522592	-2.12501	6.57926977407422e-05	0.00561146152075541	0.00468691866150051	2106	tags=37%, list=11%, signal=33%	AUH/DLD/ALDH1B1/IVD/ABAT/HMGCS2/MCCC1/ALDH6A1/OXCT2/AOX1/HADHB/ACAT1/BCKDHB/ECHS1/HADHA/MCEE
KEGG_DNA_REPLICATION	KEGG_DNA_REPLICATION	36	0.576560966202333	2.06790145815276	9.1491220447099e-05	0.00561146152075541	0.00468691866150051	6206	tags=78%, list=34%, signal=52%	POLD1/RFC4/DNA2/RPA2/RFC3/PRIM1/RFC1/RPA1/LIG1/MCM4/MCM5/MCM2/POLE/PCNA/POLA1/POLE3/RFC2/MCM7/RNASEH2A/MCM6/POLA2/POLD4/MCM3/POLD3/POLE2/RPA4/FEN1/RFC5
KEGG_PATHWAYS_IN_CANCER	KEGG_PATHWAYS_IN_CANCER	318	0.314685547989443	1.56266173291765	0.000150842289425598	0.00693874531357749	0.00579551954108875	4151	tags=33%, list=23%, signal=26%	PLD1/FGF20/WNT3A/FGFR1/MMP1/CDKN2B/CTBP2/RUNX1/PIK3CB/FZD10/TRAF4/PML/CTNNA1/WNT9A/FGF5/LAMB3/ARNT2/ITGA3/EPAS1/SHH/ITGA2/FZD3/RALGDS/HIF1A/PDGFB/MSH2/CCDC6/MET/LAMB4/WNT11/LAMC2/WNT7B/CKS1B/RASSF5/MSH3/BRCA2/CSF2RA/DAPK1/LAMA1/PTEN/RARB/CBLB/CHUK/RB1/IKBKB/WNT2B/IGF1R/HDAC1/FGF19/PIK3CD/FGF9/CCNA1/FOS/DAPK3/TCF7/FGFR2/CDH1/AR/TGFA/CYCS/PIK3CA/ARAF/FGF3/LAMC1/WNT7A/CDK2/CDKN1A/HGF/BMP4/MECOM/HSP9…
KEGG_CELL_CYCLE	KEGG_CELL_CYCLE	124	0.388051951597902	1.74372801773918	0.000240944062505799	0.00886674150021341	0.00740585960544141	6608	tags=56%, list=36%, signal=36%	GADD45A/WEE1/CCND3/CDKN2B/ORC6/CDC27/MAD2L1/YWHAQ/CCNB1/TTK/RB1/BUB1B/BUB1/HDAC1/CCNA1/CDK1/CHEK1/CDC7/CDC25C/FZR1/TFDP2/BUB3/CDK2/CCNB2/CDKN1A/MCM4/ORC1/ANAPC5/MCM5/MCM2/RAD21/ORC4/CDC6/CDC20/PCNA/RBL1/YWHAH/PTTG1/CCNE2/E2F1/CDK7/ESPL1/RBX1/MCM7/CCND1/MDM2/E2F2/MCM6/ORC2/CDKN2D/PKMYT1/GADD45B/MCM3/ATR/ANAPC13/CDKN2A/SKP2/CDC45/CCNA2/CDK6/TGFB3/CREBBP/CHEK2/HDAC2/CDC25A/PRKDC/SMAD4/TGFB1/SFN
KEGG_GLYOXYLATE_AND_DICARBOXYLATE_METABOLISM	KEGG_GLYOXYLATE_AND_DICARBOXYLATE_METABOLISM	15	-0.682979	-2.1466	0.000355634274221855	0.0109061177428036	0.00910922877831419	4874	tags=67%, list=27%, signal=49%	GRHPR/PGP/HAO2/HYI/MDH2/MDH1/AFMID/MTHFD2/CS/ACO1
KEGG_PROPANOATE_METABOLISM	KEGG_PROPANOATE_METABOLISM	31	-0.509535	-1.90981	0.000782775504037756	0.0205758132489924	0.0171857479081973	1895	tags=55%, list=10%, signal=49%	MLYCD/ACADM/LDHC/SUCLG1/ACSS1/ACSS3/LDHB/ALDH1B1/ABAT/ALDH6A1/ACSS2/SUCLA2/ACAT1/ECHS1/HADHA/MCEE/ACACA
KEGG_P53_SIGNALING_PATHWAY	KEGG_P53_SIGNALING_PATHWAY	65	0.44270583096746	1.79100997258761	0.0010475746045021	0.0240942159035482	0.0201244595075403	3144	tags=34%, list=17%, signal=28%	SESN3/GADD45A/CCND3/SIAH1/CCNG2/BBC3/THBS1/PTEN/CCNB1/CD82/CDK1/CHEK1/CYCS/PMAIP1/RRM2/CDK2/CCNB2/CDKN1A/GTSE1/TNFRSF10B/CASP3/SERPINB5
KEGG_CITRATE_CYCLE_TCA_CYCLE	KEGG_CITRATE_CYCLE_TCA_CYCLE	30	-0.498244	-1.85604	0.00326633324323716	0.0605447901292215	0.0505694471331026	2814	tags=43%, list=15%, signal=37%	IDH3B/SUCLG1/IDH1/MDH2/PDHA2/PC/DLD/MDH1/SUCLA2/PCK2/CS/DLAT/ACO1
KEGG_ADIPOCYTOKINE_SIGNALING_PATHWAY	KEGG_ADIPOCYTOKINE_SIGNALING_PATHWAY	65	-0.373844	-1.66282	0.00329047772441421	0.0605447901292215	0.0505694471331026	2191	tags=26%, list=12%, signal=23%	CD36/RXRG/PRKAG2/CAMKK1/ACSL3/PTPN11/RXRA/ACSL5/RXRB/PRKAG1/G6PC2/IRS4/PCK2/ADIPOR2/PRKAB2/PRKCQ/ACSL1
KEGG_FATTY_ACID_METABOLISM	KEGG_FATTY_ACID_METABOLISM	41	-0.427034	-1.70629	0.00417251121636051	0.0697947330736667	0.0582953720180511	3929	tags=46%, list=21%, signal=37%	ACOX1/ADH4/ADH1A/ACOX3/CYP4A11/ECI2/ALDH1B1/ACSL3/ACSL5/ADH1B/ADH5/CYP4A22/ADH6/HADHB/ACAT1/GCDH/ECHS1/HADHA/ACSL1
KEGG_PYRUVATE_METABOLISM	KEGG_PYRUVATE_METABOLISM	40	-0.422278	-1.69004	0.00491579768827091	0.0746416217017208	0.0623436886067004	3322	tags=45%, list=18%, signal=37%	ACYP1/LDHC/ACSS1/LDHD/MDH2/PDHA2/GLO1/PC/DLD/LDHB/ALDH1B1/PKLR/MDH1/ACSS2/ACAT1/PCK2/ACACA/DLAT
KEGG_MELANOMA	KEGG_MELANOMA	68	0.394245485288218	1.6253434566688	0.00567925382513093	0.0746416217017208	0.0623436886067004	4833	tags=46%, list=26%, signal=34%	FGF20/PDGFD/FGFR1/PIK3CB/FGF5/PDGFB/MET/PTEN/RB1/IGF1R/FGF19/PIK3CD/FGF9/CDH1/PIK3CA/ARAF/FGF3/CDKN1A/HGF/PDGFRB/PDGFA/AKT2/PIK3R3/PDGFC/FGF17/E2F1/CCND1/MDM2/MAPK1/E2F2/FGF18
KEGG_AXON_GUIDANCE	KEGG_AXON_GUIDANCE	127	0.342992781589928	1.54964698964806	0.00558274946343805	0.0746416217017208	0.0623436886067004	4734	tags=39%, list=26%, signal=29%	LIMK2/EPHA2/EFNA1/SLIT2/ROBO2/ABLIM3/ARHGEF12/SEMA3E/SEMA3D/RGS3/RND1/NTN1/MET/SEMA3A/GNAI3/EPHB6/UNC5D/EFNA5/EFNA2/SEMA3C/SEMA6A/NFAT5/SEMA3F/SEMA4F/ROBO1/PPP3R2/DCC/PLXNB1/SEMA4G/EPHA4/RHOD/EFNA4/SEMA5B/PLXNB2/SEMA4C/EFNB1/SEMA4A/PPP3CB/LRRC4C/GNAI2/ABLIM2/ABLIM1/EPHA1/NTNG1/PAK2/DPYSL2/PAK1/NFATC3/MAPK1/L1CAM
KEGG_GLYCOLYSIS_GLUCONEOGENESIS	KEGG_GLYCOLYSIS_GLUCONEOGENESIS	60	-0.369138	-1.60392	0.00758744978136699	0.0878133795858936	0.0733452712788356	4028	tags=43%, list=22%, signal=34%	LDHC/ADH4/PFKL/ADH1A/PFKM/ACSS1/PGAM4/HK2/PDHA2/DLD/LDHB/ALDH1B1/PKLR/ALDOB/PGAM2/ALDH1A3/ACSS2/ENO3/ADH1B/ADH5/G6PC2/ALDH3B2/AKR1A1/ADH6/PCK2/DLAT
KEGG_CHRONIC_MYELOID_LEUKEMIA	KEGG_CHRONIC_MYELOID_LEUKEMIA	73	0.384581905828867	1.59346167532454	0.00763594605094727	0.0878133795858936	0.0733452712788356	6586	tags=58%, list=36%, signal=37%	CTBP2/RUNX1/PIK3CB/CBLB/CHUK/RB1/IKBKB/HDAC1/PIK3CD/PIK3CA/ARAF/SHC4/CDKN1A/MECOM/TGFBR2/CBL/AKT2/PIK3R3/SHC1/SHC3/CTBP1/E2F1/CCND1/MDM2/MAPK1/E2F2/BCL2L1/CDKN2A/MAP2K1/STAT5A/CDK6/KRAS/TGFB3/MAPK3/GRB2/BCR/HDAC2/BAD/AKT1/SMAD4/TGFB1/IKBKG
KEGG_HEMATOPOIETIC_CELL_LINEAGE	KEGG_HEMATOPOIETIC_CELL_LINEAGE	82	0.373009251768024	1.58592482331069	0.00906593244601437	0.0981253864745085	0.0819582747441547	3604	tags=29%, list=20%, signal=24%	IL11/IL4R/IL1R2/CD55/ITGA3/IL1A/CR1/ITGA2/HLA-DRA/CSF1/IL1B/IL9R/CSF2RA/CD8B/CD1C/ANPEP/IL7R/EPOR/IL7/FCGR1A/CD1D/CSF3R/CD1B/ITGA6
KEGG_LYSINE_DEGRADATION	KEGG_LYSINE_DEGRADATION	39	-0.403088	-1.61068	0.00960776023048465	0.0982126601338431	0.0820311692193427	2647	tags=36%, list=14%, signal=31%	DOT1L/SETMAR/AADAT/PIPOX/ALDH1B1/ASH1L/SETD2/TMLHE/ACAT1/GCDH/ECHS1/AASS/SETDB1/HADHA

## Sheet: 06.HTR2C_result
ID	Description	setSize	enrichmentScore	NES	pvalue	p.adjust	qvalue	rank	leading_edge	core_enrichment
KEGG_CYTOKINE_CYTOKINE_RECEPTOR_INTERACTION	KEGG_CYTOKINE_CYTOKINE_RECEPTOR_INTERACTION	243	0.352144081009212	1.88697168254915	8.91139891124663e-08	1.63969739966938e-05	1.32263920682713e-05	3473	tags=32%, list=19%, signal=26%	RELT/PF4V1/TNFSF15/CSF1/TNFRSF12A/IL1A/BMPR1B/FAS/CSF2/CXCL16/CX3CL1/CXCR6/IL1R2/IL1B/TNFRSF18/IL7R/TNFRSF21/CCR9/IL11/IL24/TNFRSF10D/BMP2/CSF3/TNFSF18/CXCL3/TNFRSF10B/CXCL14/CXCL1/CCL20/PDGFB/TNFRSF10C/CXCL6/CXCL5/INHBB/TNFSF11/IL4R/IL19/CCL24/IL21R/PDGFC/MET/IL5/TNFRSF14/TNFRSF1B/CCL15/OSMR/TNFSF9/IL10/VEGFA/OSM/IL18R1/IL22RA2/IL22RA1/IFNLR1/HGF/IL6R/EGFR/TNFSF14/CSF1R/CCR6/IL17A/LEP/IFNA8/CCL7…
KEGG_BUTANOATE_METABOLISM	KEGG_BUTANOATE_METABOLISM	33	-0.631749	-2.26664	3.69524892071032e-06	0.000339962900705349	0.000274226367273766	3254	tags=58%, list=18%, signal=47%	ALDH1B1/GAD1/PDHA1/HADH/ACSM5/ECHS1/ACSM2A/ACSM1/BDH2/OXCT1/ALDH2/PDHA2/ABAT/ACSM3/OXCT2/HMGCL/HMGCS2/ACAT1/HADHA
KEGG_FATTY_ACID_METABOLISM	KEGG_FATTY_ACID_METABOLISM	41	-0.594298	-2.23345	5.94304328677463e-06	0.000364506654922177	0.000294024246819376	3444	tags=54%, list=19%, signal=44%	CYP4A11/ALDH1B1/HADH/ECHS1/ADH4/GCDH/CYP4A22/ADH6/ADH1A/ACADM/ACOX3/HADHB/ALDH2/ECI2/ACSL5/ACOX1/CPT2/ACSL1/ADH1B/ACAT1/HADHA/ADH5
KEGG_VALINE_LEUCINE_AND_ISOLEUCINE_DEGRADATION	KEGG_VALINE_LEUCINE_AND_ISOLEUCINE_DEGRADATION	43	-0.560743	-2.11588	1.0439270936647e-05	0.000429574530941804	0.000346510348185323	3254	tags=49%, list=18%, signal=40%	ALDH1B1/DLD/HADH/AOX1/ECHS1/OXCT1/PCCA/ACADM/HADHB/HIBADH/ALDH2/ABAT/OXCT2/DBT/MCEE/HMGCL/ALDH6A1/BCKDHB/HMGCS2/ACAT1/HADHA
KEGG_PATHWAYS_IN_CANCER	KEGG_PATHWAYS_IN_CANCER	318	0.295998770877783	1.63983483158107	1.16732209495056e-05	0.000429574530941804	0.000346510348185323	4478	tags=37%, list=24%, signal=29%	PGF/TRAF4/FZD10/FAS/PIK3CB/MMP1/CYCS/LAMB3/LAMA1/FGFR1/FGF5/FGF20/LAMC2/SHH/TRAF1/VHL/CTBP2/FGFR2/ERBB2/RALGDS/CTNNA1/WNT4/BCR/FGF4/BMP2/PLD1/TCF7/WNT6/FGF18/MAP2K1/BMP4/PML/RB1/WNT3A/LAMC3/ITGA3/PDGFB/PLCG2/BIRC2/DAPK1/PTGS2/WNT10A/SMAD2/CCNA1/AR/WNT11/HSP90AA1/MET/CDKN2B/EPAS1/MSH2/HIF1A/RASSF1/MSH3/TRAF3/VEGFA/PPARD/PTEN/HGF/EGFR/DAPK3/RBX1/MDM2/CSF1R/RUNX1/LAMA5/BRCA2/ARNT2/WNT7A/IKBKB/FGF19/…
KEGG_RIBOSOME	KEGG_RIBOSOME	86	-0.425219	-1.88552	0.000110280665728497	0.00338194041567392	0.00272799541538915	5424	tags=57%, list=30%, signal=40%	RPS27/RPL38/RPL41/RPL39/RPS27A/RPL35/RPL13/RPS19/RPS29/RPL34/RPS15/RPLP0/RPL30/RPL11/RPLP2/RPL10A/RPL36/RPL24/RPL15/RPS25/RPL36A/RPL36AL/RPS17/RPL26/RPL4/RPL27/RPL23/RPL29/RPS13/RPL8/RPS27L/RPL28/RPS8/RPL12/RPS24/RPS4X/RPL7A/MRPL13/RPS16/RPL32/RPL23A/RPS28/RPS2/RPL18A/RPL10/RPS11/UBA52/RPL19/RPL14
KEGG_PROPANOATE_METABOLISM	KEGG_PROPANOATE_METABOLISM	31	-0.572081	-2.03948	0.000392184953782157	0.0103088616422738	0.00831550052380212	4161	tags=68%, list=23%, signal=52%	ALDH9A1/LDHC/SUCLG2/MLYCD/ACACB/HIBCH/ALDH1B1/SUCLG1/ECHS1/ACACA/PCCA/LDHB/SUCLA2/ACADM/ALDH2/ABAT/ACSS3/MCEE/ALDH6A1/ACAT1/HADHA
KEGG_CIRCADIAN_RHYTHM_MAMMAL	KEGG_CIRCADIAN_RHYTHM_MAMMAL	13	0.702939776035264	2.01892439249892	0.000722150521948271	0.0166094620048102	0.0133977925782508	3500	tags=62%, list=19%, signal=50%	PER2/BHLHE41/PER3/CRY1/NR1D1/CRY2/BHLHE40/CSNK1D
KEGG_PPAR_SIGNALING_PATHWAY	KEGG_PPAR_SIGNALING_PATHWAY	65	-0.435969	-1.81704	0.000955006711366965	0.0176900572038444	0.0142694397353665	2292	tags=35%, list=12%, signal=31%	PPARA/CYP7A1/NR1H3/FABP3/ILK/CYP4A22/LPL/ACADM/ACOX3/PLIN1/CYP27A1/ACOX2/RXRG/ACSL5/FABP5/ACOX1/PCK2/CPT2/FABP4/ACSL1/CD36/PPARG/HMGCS2
KEGG_DRUG_METABOLISM_CYTOCHROME_P450	KEGG_DRUG_METABOLISM_CYTOCHROME_P450	64	-0.434524	-1.80375	0.00096141615238285	0.0176900572038444	0.0142694397353665	3540	tags=41%, list=19%, signal=33%	MGST2/CYP2C9/UGT2B11/UGT1A8/FMO2/FMO4/GSTO2/AOX1/ALDH3B2/UGT1A9/UGT1A5/UGT1A1/ADH4/CYP3A43/ADH6/ADH1A/CYP3A4/CYP2A7/MGST3/GSTM2/MAOB/UGT1A3/FMO5/MGST1/ADH1B/ADH5
KEGG_RETINOL_METABOLISM	KEGG_RETINOL_METABOLISM	56	-0.449713	-1.8231	0.00107814960087574	0.0180345024146487	0.0145472816960267	3444	tags=39%, list=19%, signal=32%	CYP4A11/CYP2C9/UGT2B11/UGT1A8/UGT1A9/UGT1A5/UGT1A1/CYP26A1/ADH4/CYP4A22/CYP3A43/ADH6/ADH1A/PNPLA4/CYP3A4/CYP2A7/UGT1A3/RETSAT/ADH1B/DHRS4/DHRS4L2/ADH5
KEGG_LYSOSOME	KEGG_LYSOSOME	121	-0.351428	-1.64162	0.00175563864581525	0.0269197925691672	0.0217144779877149	5564	tags=45%, list=30%, signal=32%	CLTA/NAPSA/TPP1/CTSW/ATP6V0A2/ARSA/SORT1/AP4M1/NPC1/CTSK/NPC2/AP1M1/SGSH/DNASE2/CD63/ACP2/LAMP2/PSAPL1/HEXB/GNPTG/ACP5/GM2A/MAN2B1/MFSD8/AP1S1/IGF2R/AP3M2/GALNS/LAPTM5/GNPTAB/MANBA/CTSG/CTSE/AP1B1/CTSF/NAGLU/CLTCL1/CTSL/ATP6AP1/MCOLN1/CTSA/AP1S2/ABCB9/AP3S2/CLN3/SLC11A1/ATP6V1H/DNASE2B/GALC/HGSNAT/HEXA/AP3B1/SCARB2/AP3M1/GBA
KEGG_STEROID_HORMONE_BIOSYNTHESIS	KEGG_STEROID_HORMONE_BIOSYNTHESIS	48	-0.45093	-1.7565	0.00217966046887522	0.02864696616236	0.0231076786549929	3343	tags=42%, list=18%, signal=34%	UGT2B11/UGT1A8/HSD17B2/UGT1A9/UGT1A5/UGT1A1/CYP7A1/AKR1C4/CYP19A1/SRD5A3/CYP3A43/CYP3A4/SULT1E1/UGT1A3/HSD17B1/AKR1D1/HSD11B2/CYP11A1/HSD17B6/STS
KEGG_TGF_BETA_SIGNALING_PATHWAY	KEGG_TGF_BETA_SIGNALING_PATHWAY	85	0.357853391566066	1.67261691223969	0.00217137065125304	0.02864696616236	0.0231076786549929	3473	tags=33%, list=19%, signal=27%	SMAD7/GDF6/BMPR1B/ID4/BMP6/SMAD6/SMURF2/COMP/PPP2CA/BMP2/PPP2R1B/ID1/BMP4/INHBB/ID2/SMAD2/CDKN2B/BMP8B/RBX1/ACVR1C/BMP5/TGFB3/INHBE/BMP7/SMAD5/ACVR2B/FST/INHBA
KEGG_CELL_ADHESION_MOLECULES_CAMS	KEGG_CELL_ADHESION_MOLECULES_CAMS	126	0.316640276806607	1.57294375111071	0.00319940569081553	0.0392460431406705	0.0316572773617537	4287	tags=35%, list=23%, signal=27%	ICAM3/CLDN6/HLA-A/CD8B/ICAM1/SDC1/ICOSLG/PVR/CLDN10/HLA-DQA2/SDC4/CLDN14/HLA-B/CLDN3/F11R/NRXN1/CD8A/NRCAM/CADM1/CTLA4/ITGA8/VCAN/CDH1/VCAM1/HLA-DRA/CD276/ITGAL/HLA-C/ICAM2/CLDN22/NCAM2/CDH15/CD274/ITGA6/CDH2/ITGA9/CD80/CDH4/ICOS/CLDN17/HLA-F/HLA-DQB1/CLDN15/NLGN2
KEGG_OLFACTORY_TRANSDUCTION	KEGG_OLFACTORY_TRANSDUCTION	276	0.253988417612039	1.38503295859476	0.00391432552350054	0.0450147435202563	0.0363105196587879	2609	tags=26%, list=14%, signal=22%	OR13C3/OR2M3/OR2T10/OR2T8/OR2W3/OR2M4/OR2L13/OR2T3/CLCA4/OR10J1/OR10S1/OR2AK2/OR14C36/OR2T5/OR2L2/OR2T34/CALML5/OR2G6/OR10C1/OR10G9/OR2T33/OR2B11/OR4F5/OR2T6/OR52I2/OR4A47/OR5J2/OR8K1/OR5M10/OR5AR1/OR10P1/OR4K13/OR7C2/OR2T29/OR51G2/OR3A2/CNGA4/OR12D2/OR9I1/OR2F2/OR13J1/OR5M3/OR10H5/OR8G5/OR12D3/OR4C6/OR8U1/OR10Q1/OR6C2/OR2M5/CLCA2/OR4F17/OR2B6/OR5AK2/OR2T11/OR2T2/CNGA3/OR8D2/OR10Z1/OR2B3/OR14J1/O…
KEGG_STEROID_BIOSYNTHESIS	KEGG_STEROID_BIOSYNTHESIS	17	0.620412815365431	1.93320766778769	0.00427008025966375	0.0462173392810665	0.0372805768800365	3128	tags=53%, list=17%, signal=44%	SC5D/CYP27B1/DHCR7/MSMO1/CYP51A1/FDFT1/SOAT1/EBP/DHCR24
KEGG_DNA_REPLICATION	KEGG_DNA_REPLICATION	36	0.443683312639432	1.73173568625579	0.00502684574491851	0.0513855342813892	0.041449429826521	5695	tags=53%, list=31%, signal=36%	POLD1/MCM2/MCM6/POLD2/MCM4/MCM3/POLA1/FEN1/PCNA/POLA2/RFC2/DNA2/MCM5/POLE/RNASEH2A/MCM7/LIG1/RPA1/RFC4
KEGG_OXIDATIVE_PHOSPHORYLATION	KEGG_OXIDATIVE_PHOSPHORYLATION	111	-0.337409	-1.54758	0.0067613332924797	0.0654781750429613	0.0528170633927777	7101	tags=56%, list=39%, signal=34%	ATP6V1B2/LHPP/ATP6V0D2/ATP6V0B/MT-CO2/UQCRC2/ATP4B/MT-CO1/MT-ND6/COX6C/COX8A/NDUFB3/COX7A2L/ATP6V1E2/NDUFC1/COX7A2/NDUFB5/NDUFA8/MT-CO3/NDUFB9/COX5A/MT-ATP6/NDUFB2/ATP6V0A2/ATP6V1D/NDUFAB1/MT-ND1/COX4I2/NDUFS6/COX6A1/COX6B1/UQCR10/SDHB/NDUFB1/NDUFS4/NDUFC2/ATP6V1F/ATP12A/MT-ND3/SDHA/NDUFB10/COX4I1/ATP6V0E2/NDUFA4L2/UQCR11/MT-ND5/PPA1/MT-ND4/NDUFA3/ATP6AP1/NDUFA4/ATP6V1G2/MT-ND2/UQCRB/MT-ND4L/COX1…
KEGG_BETA_ALANINE_METABOLISM	KEGG_BETA_ALANINE_METABOLISM	22	-0.540598	-1.75083	0.00842306610597011	0.072571578794553	0.0585388593251257	4473	tags=55%, list=24%, signal=41%	DPYD/HIBCH/ALDH1B1/GAD1/ECHS1/ACADM/ALDH2/ABAT/AOC3/UPB1/SMS/HADHA
KEGG_MATURITY_ONSET_DIABETES_OF_THE_YOUNG	KEGG_MATURITY_ONSET_DIABETES_OF_THE_YOUNG	20	0.531077787180603	1.74535542953749	0.00907144734931913	0.072571578794553	0.0585388593251257	3979	tags=55%, list=22%, signal=43%	NKX6-1/HNF1B/NEUROG3/MAFA/HES1/FOXA3/HNF4G/HNF4A/NKX2-2/PAX6/ONECUT1
KEGG_BLADDER_CANCER	KEGG_BLADDER_CANCER	40	0.427292443355216	1.69275418342437	0.00891921150853746	0.072571578794553	0.0585388593251257	4686	tags=52%, list=25%, signal=39%	PGF/MMP1/ERBB2/MAP2K1/RB1/DAPK1/RASSF1/VEGFA/EGFR/DAPK3/MDM2/CDH1/MAP2K2/NRAS/FGFR3/E2F1/CDKN1A/MMP2/CCND1/CDK4/TYMP
KEGG_ADIPOCYTOKINE_SIGNALING_PATHWAY	KEGG_ADIPOCYTOKINE_SIGNALING_PATHWAY	65	-0.3939	-1.6417	0.00800191280067161	0.072571578794553	0.0585388593251257	2464	tags=28%, list=13%, signal=24%	AGRP/PPARA/ADIPOR1/PRKAG1/PRKAB1/G6PC2/PRKAG2/MTOR/CAMKK1/PRKCQ/RXRG/ACSL5/PCK2/NPY/IRS4/PRKAB2/ACSL1/CD36
KEGG_HEMATOPOIETIC_CELL_LINEAGE	KEGG_HEMATOPOIETIC_CELL_LINEAGE	82	0.333369600864709	1.53985892596726	0.0106742874788981	0.0818362040048856	0.0660120409879226	4812	tags=40%, list=26%, signal=30%	CD8B/CSF1/IL1A/CSF2/IL1R2/IL1B/IL7R/IL11/CSF3/CD1C/ITGA3/IL4R/IL5/CD8A/CD9/IL6R/CSF1R/CD1D/CD55/HLA-DRA/GP5/GP1BB/ITGA6/CD3D/FLT3/CD1A/TNF/TFRC/CSF2RA/CR2/GYPA/CD37/IL9R
KEGG_CITRATE_CYCLE_TCA_CYCLE	KEGG_CITRATE_CYCLE_TCA_CYCLE	30	-0.46679	-1.64714	0.0117628795929562	0.086574793804158	0.0698343588466034	3847	tags=47%, list=21%, signal=37%	IDH3A/SDHB/IDH3G/IDH1/SUCLG1/DLD/PDHA1/SDHA/SUCLA2/PDHA2/PCK2/MDH1/DLAT/CS
KEGG_VEGF_SIGNALING_PATHWAY	KEGG_VEGF_SIGNALING_PATHWAY	74	0.338858601023632	1.54605985250972	0.0134915689908606	0.092113124093445	0.0743017762996324	2996	tags=28%, list=16%, signal=24%	PIK3CB/SH2D2A/PLA2G3/PLA2G1B/MAP2K1/PLCG2/NFAT5/PTGS2/VEGFA/PPP3CB/SPHK1/NFATC1/CHP2/PIK3CD/MAP2K2/PLA2G12B/AKT1/JMJD7-PLA2G4B/PRKCB/NRAS/MAPK13
KEGG_MELANOMA	KEGG_MELANOMA	68	0.345795071416946	1.54564361290065	0.014017214535959	0.092113124093445	0.0743017762996324	4277	tags=46%, list=23%, signal=35%	PIK3CB/FGFR1/FGF5/PDGFD/FGF20/FGF4/FGF18/MAP2K1/RB1/PDGFB/PDGFC/MET/PTEN/HGF/EGFR/MDM2/FGF19/CDH1/PIK3CD/MAP2K2/AKT1/NRAS/IGF1R/FGF16/E2F1/PDGFA/PIK3R3/CDKN1A/PDGFRB/CCND1/FGF9
KEGG_PARKINSONS_DISEASE	KEGG_PARKINSONS_DISEASE	110	-0.321191	-1.46637	0.0135203745609757	0.092113124093445	0.0743017762996324	6933	tags=54%, list=38%, signal=34%	APAF1/MT-CO2/UQCRC2/MT-CO1/UBA1/MT-ND6/SLC25A31/COX6C/COX8A/NDUFB3/COX7A2L/NDUFC1/COX7A2/UBE2G2/NDUFB5/NDUFA8/UBA7/MT-CO3/NDUFB9/COX5A/MT-ATP6/NDUFB2/VDAC1/SLC25A6/UBE2L6/NDUFAB1/MT-ND1/COX4I2/NDUFS6/COX6A1/COX6B1/UQCR10/SDHB/NDUFB1/SNCAIP/NDUFS4/NDUFC2/VDAC2/MT-ND3/SDHA/NDUFB10/COX4I1/UCHL1/NDUFA4L2/UQCR11/MT-ND5/MT-ND4/SLC25A4/NDUFA3/PPID/GPR37/NDUFA4/MT-ND2/UQCRB/MT-ND4L/COX7B/MT-CYB/UBE2J2/ND…
KEGG_PROSTATE_CANCER	KEGG_PROSTATE_CANCER	88	0.316405620547037	1.48172874966779	0.0154228638723646	0.0978554121556924	0.0789337134665482	4303	tags=39%, list=23%, signal=30%	PIK3CB/FGFR1/PDGFD/FGFR2/ERBB2/TCF7/MAP2K1/RB1/PDGFB/AR/PDGFC/HSP90AA1/PTEN/EGFR/MDM2/IKBKB/CREB3L3/PIK3CD/CDK2/MAP2K2/CREB5/AKT1/NRAS/IGF1R/E2F1/PDGFA/PIK3R3/CDKN1A/CCNE2/GSTP1/TCF7L1/PDGFRB/CCND1/CASP9
KEGG_CELL_CYCLE	KEGG_CELL_CYCLE	124	0.285213009373303	1.41062257450969	0.0159921326512724	0.0980850802611375	0.0791189720641898	4921	tags=41%, list=27%, signal=30%	GADD45A/WEE1/YWHAQ/RB1/MCM2/MCM6/SMAD2/CCNA1/MAD2L1/MCM4/CDKN2B/CCND3/MCM3/PRKDC/RBX1/MDM2/ANAPC2/ORC1/CDK2/TGFB3/ZBTB17/ORC6/FZR1/CCNB1/CHEK1/ANAPC7/PCNA/HDAC1/MAD1L1/YWHAH/MAD2L2/E2F1/CDC25C/BUB1B/SMC1A/CDKN1A/PKMYT1/ORC2/CCNE2/CDC27/MCM5/CCND1/BUB1/E2F5/GADD45B/CDC7/CDK4/BUB3/TTK/ESPL1/MCM7

## Sheet: 07.SIX1_result
ID	Description	setSize	enrichmentScore	NES	pvalue	p.adjust	qvalue	rank	leading_edge	core_enrichment
KEGG_RIBOSOME	KEGG_RIBOSOME	86	-0.456018	-2.03228	7.19611216344118e-06	0.00132408463807318	0.00121197678542167	6267	tags=60%, list=34%, signal=40%	RPLP0/RPL31/RPL15/RPS24/RPL10A/RPL37A/RPL35A/RPL30/RPS3/RPL21/RPS27A/RPL37/RPL36/RPL18/RPS4X/RPL39/RPL27A/RPS17/RPS15/RPL35/RPS8/RPL36AL/RPS13/RPL23/RPL29/RPL7A/RPS25/RPL24/RPL36A/RPL11/RPL32/RPL38/RPL18A/RPL8/RPL3L/RPS27/RPL13/RPL10/RPL41/RPL19/RPS29/RPL4/RPL23A/RPS16/RPL12/RPL27/RPS2/RPS11/RPS28/RPL28/UBA52/RPL14
KEGG_MATURITY_ONSET_DIABETES_OF_THE_YOUNG	KEGG_MATURITY_ONSET_DIABETES_OF_THE_YOUNG	20	0.627612244682385	2.06838423928578	0.000667409189712576	0.0409344303023713	0.0374685860891271	3532	tags=65%, list=19%, signal=53%	HNF4G/FOXA3/HNF1B/HES1/NKX2-2/NKX6-1/MAFA/NEUROG3/HNF4A/HNF1A/BHLHA15/FOXA2/ONECUT1
KEGG_PHOSPHATIDYLINOSITOL_SIGNALING_SYSTEM	KEGG_PHOSPHATIDYLINOSITOL_SIGNALING_SYSTEM	76	-0.407757	-1.76113	0.000657477520802345	0.0409344303023713	0.0374685860891271	3822	tags=38%, list=21%, signal=30%	PLCB2/ITPKB/PIK3C2A/PLCG1/INPP5K/PIP4K2B/PLCE1/PIK3C3/PIP5K1C/CALML6/CDIPT/INPPL1/INPP5A/IMPA2/PIP4K2A/DGKD/INPP5B/CALM3/PI4KA/PIKFYVE/DGKG/PLCD1/PIK3R2/PIK3R1/DGKI/PLCD4/PI4KB/ITPKA/PIP5K1B
KEGG_INOSITOL_PHOSPHATE_METABOLISM	KEGG_INOSITOL_PHOSPHATE_METABOLISM	54	-0.444234	-1.78616	0.00142423280552415	0.058741187126871	0.0537676770040009	3822	tags=44%, list=21%, signal=35%	PLCB2/ITPKB/PIK3C2A/PLCG1/ALDH6A1/INPP5K/PIP4K2B/PLCE1/PIK3C3/PIP5K1C/CDIPT/INPPL1/MINPP1/INPP5A/IMPA2/PIP4K2A/INPP5B/PI4KA/PIKFYVE/PLCD1/PLCD4/PI4KB/ITPKA/PIP5K1B
KEGG_CYTOKINE_CYTOKINE_RECEPTOR_INTERACTION	KEGG_CYTOKINE_CYTOKINE_RECEPTOR_INTERACTION	243	0.272004693450654	1.46580798261564	0.00159622791105628	0.058741187126871	0.0537676770040009	3049	tags=25%, list=17%, signal=21%	IL1A/BMPR1B/PF4V1/CSF1/CSF2/TNFSF15/IL6R/CSF3/MET/CXCL16/IL1R2/FAS/CXCL5/INHBB/RELT/IL1B/TNFRSF12A/IL4R/TNFRSF10C/IL18/CXCL14/IFNLR1/TNFRSF10B/IL19/TNFRSF1B/TNFRSF11A/CXCL3/IL17A/LEP/IFNA8/CCL7/IL7R/BMP7/CCL15/TNFRSF6B/TNFSF9/TNFRSF10A/CCL24/IL1RAP/CX3CL1/CXCL1/IFNG/IL24/IL22RA1/EGFR/IL23A/OSMR/TNFSF14/IL5RA/CXCL6/CXCR6/TNFSF18/TNFSF11/CCR9/TNFRSF21/TNFRSF18/IL18R1/CXCR2/PDGFC/ACVR2B/PDGFB
