# Supplementary material for: Integrated multi-omics analysis to investigate the pathogenesis of intrauterine adhesion
Source: Research Square preprint supplement (doi:10.21203/rs.3.rs-7079007/v1), 2025-08-08
Supplement: Supplementary file 10 [file cfac1f418c1987680199c8ab.xlsx]

## Sheet: GO
ONTOLOGY	ID	Description	GeneRatio	BgRatio	pvalue	p.adjust	qvalue	geneID	Count
BP	GO:0045785	positive regulation of cell adhesion	8/40	482/18870	6.40780617615657e-06	0.00736682144942667	0.00486789676458645	CX3CL1/VNN1/COL8A1/ZBTB16/CD36/IL1A/HLA-DOB/SHH	8
BP	GO:0045444	fat cell differentiation	6/40	248/18870	1.28043911511101e-05	0.00736682144942667	0.00486789676458645	SULT1E1/SIX1/ZBTB16/HTR2C/LAMB3/STEAP4	6
BP	GO:0045600	positive regulation of fat cell differentiation	4/40	71/18870	1.51788903490934e-05	0.00736682144942667	0.00486789676458645	SULT1E1/SIX1/ZBTB16/HTR2C	4
BP	GO:0022409	positive regulation of cell-cell adhesion	6/40	322/18870	5.54681422205892e-05	0.0175925620354179	0.0116249289331781	CX3CL1/VNN1/ZBTB16/IL1A/HLA-DOB/SHH	6
BP	GO:0008202	steroid metabolic process	6/40	327/18870	6.04140179787701e-05	0.0175925620354179	0.0116249289331781	SULT1E1/CYP26A1/IL1A/CYP24A1/SHH/HSD17B2	6
BP	GO:0042445	hormone metabolic process	5/40	241/18870	0.000148928002015448	0.0204283906325568	0.0134988064185634	SULT1E1/CYP26A1/SHH/DUOX1/HSD17B2	5
BP	GO:0050870	positive regulation of T cell activation	5/40	251/18870	0.000179998559103055	0.0204283906325568	0.0134988064185634	VNN1/ZBTB16/IL1A/HLA-DOB/SHH	5
BP	GO:0007528	neuromuscular junction development	3/40	52/18870	0.00018145695650815	0.0204283906325568	0.0134988064185634	SIX1/LRP4/FZD9	3
BP	GO:0051124	synaptic assembly at neuromuscular junction	2/40	10/18870	0.000195052001174756	0.0204283906325568	0.0134988064185634	SIX1/LRP4	2
BP	GO:0071340	skeletal muscle acetylcholine-gated channel clustering	2/40	10/18870	0.000195052001174756	0.0204283906325568	0.0134988064185634	LRP4/FZD9	2
BP	GO:0033089	positive regulation of T cell differentiation in thymus	2/40	11/18870	0.000238077133329836	0.0204283906325568	0.0134988064185634	VNN1/SHH	2
BP	GO:0042363	fat-soluble vitamin catabolic process	2/40	11/18870	0.000238077133329836	0.0204283906325568	0.0134988064185634	CYP26A1/CYP24A1	2
BP	GO:0042733	embryonic digit morphogenesis	3/40	57/18870	0.000238489232932535	0.0204283906325568	0.0134988064185634	ZBTB16/LRP4/SHH	3
BP	GO:0042060	wound healing	6/40	423/18870	0.000246447860242803	0.0204283906325568	0.0134988064185634	CX3CL1/CD36/IL1A/SHH/DUOX1/DGKG	6
BP	GO:0001706	endoderm formation	3/40	58/18870	0.00025112896924136	0.0204283906325568	0.0134988064185634	COL8A1/DUSP2/LAMB3	3
BP	GO:0045598	regulation of fat cell differentiation	4/40	146/18870	0.000253101102748635	0.0204283906325568	0.0134988064185634	SULT1E1/SIX1/ZBTB16/HTR2C	4
BP	GO:1903039	positive regulation of leukocyte cell-cell adhesion	5/40	275/18870	0.000274770703008247	0.0204283906325568	0.0134988064185634	VNN1/ZBTB16/IL1A/HLA-DOB/SHH	5
BP	GO:0033083	regulation of immature T cell proliferation	2/40	12/18870	0.000285309415715956	0.0204283906325568	0.0134988064185634	IL1A/SHH	2
BP	GO:0033084	regulation of immature T cell proliferation in thymus	2/40	12/18870	0.000285309415715956	0.0204283906325568	0.0134988064185634	IL1A/SHH	2
BP	GO:2000179	positive regulation of neural precursor cell proliferation	3/40	63/18870	0.000320835369856091	0.0204283906325568	0.0134988064185634	CX3CL1/FZD9/SHH	3
BP	GO:0009111	vitamin catabolic process	2/40	13/18870	0.000336731713723464	0.0204283906325568	0.0134988064185634	CYP26A1/CYP24A1	2
BP	GO:0033079	immature T cell proliferation	2/40	13/18870	0.000336731713723464	0.0204283906325568	0.0134988064185634	IL1A/SHH	2
BP	GO:0033080	immature T cell proliferation in thymus	2/40	13/18870	0.000336731713723464	0.0204283906325568	0.0134988064185634	IL1A/SHH	2
BP	GO:1903909	regulation of receptor clustering	2/40	13/18870	0.000336731713723464	0.0204283906325568	0.0134988064185634	LRP4/FZD9	2
BP	GO:0072075	metanephric mesenchyme development	2/40	14/18870	0.000392326943349256	0.0228491211806607	0.0150983926829987	SIX1/SHH	2
BP	GO:0034504	protein localization to nucleus	5/40	310/18870	0.000475784744013872	0.0266439456647768	0.0176059617825376	SIX1/ZBTB16/ORMDL3/CD36/SHH	5
BP	GO:0001822	kidney development	5/40	314/18870	0.000504364253059988	0.0268303419125059	0.0177291299219421	SIX1/ZBTB16/LRP4/CYP26A1/SHH	5
BP	GO:0014857	regulation of skeletal muscle cell proliferation	2/40	16/18870	0.000515968113702036	0.0268303419125059	0.0177291299219421	SIX1/SHH	2
BP	GO:0022407	regulation of cell-cell adhesion	6/40	493/18870	0.000556844795984375	0.0274282284309173	0.018124205310771	CX3CL1/VNN1/ZBTB16/IL1A/HLA-DOB/SHH	6
BP	GO:0072001	renal system development	5/40	324/18870	0.000581482771478944	0.0274282284309173	0.018124205310771	SIX1/ZBTB16/LRP4/CYP26A1/SHH	5
BP	GO:0072074	kidney mesenchyme development	2/40	17/18870	0.000583980138295629	0.0274282284309173	0.018124205310771	SIX1/SHH	2
BP	GO:0051251	positive regulation of lymphocyte activation	5/40	330/18870	0.000631827518454506	0.0279289509980419	0.018455076064351	VNN1/ZBTB16/IL1A/HLA-DOB/SHH	5
BP	GO:0033194	response to hydroperoxide	2/40	18/18870	0.000656097261984111	0.0279289509980419	0.018455076064351	GPX3/CD36	2
BP	GO:0072189	ureter development	2/40	18/18870	0.000656097261984111	0.0279289509980419	0.018455076064351	SIX1/SHH	2
BP	GO:0007405	neuroblast proliferation	3/40	81/18870	0.000671369014376008	0.0279289509980419	0.018455076064351	CX3CL1/FZD9/SHH	3
BP	GO:0007492	endoderm development	3/40	83/18870	0.000720880833033848	0.0288170989491599	0.0190419523131378	COL8A1/DUSP2/LAMB3	3
BP	GO:0060602	branch elongation of an epithelium	2/40	19/18870	0.000732302651867388	0.0288170989491599	0.0190419523131378	SIX1/SHH	2
BP	GO:0033273	response to vitamin	3/40	86/18870	0.000799418956930366	0.0306303684550161	0.0202401364718658	CYP26A1/IL1A/CYP24A1	3
BP	GO:0033077	T cell differentiation in thymus	3/40	87/18870	0.000826757685333682	0.0308656202524575	0.0203955877029686	VNN1/IL1A/SHH	3
BP	GO:0016338	calcium-independent cell-cell adhesion via plasma membrane cell-adhesion molecules	2/40	23/18870	0.00107767195696211	0.0378694368675105	0.0250236157438581	CX3CL1/CLDN8	2
BP	GO:0070374	positive regulation of ERK1 and ERK2 cascade	4/40	218/18870	0.00114314884636996	0.0378694368675105	0.0250236157438581	CX3CL1/CD36/IL1A/HTR2C	4
BP	GO:0002696	positive regulation of leukocyte activation	5/40	380/18870	0.00118884370400587	0.0378694368675105	0.0250236157438581	VNN1/ZBTB16/IL1A/HLA-DOB/SHH	5
BP	GO:0098869	cellular oxidant detoxification	3/40	99/18870	0.00120210829634289	0.0378694368675105	0.0250236157438581	GPX3/CD36/DUOX1	3
BP	GO:0050863	regulation of T cell activation	5/40	381/18870	0.00120279229536529	0.0378694368675105	0.0250236157438581	VNN1/ZBTB16/IL1A/HLA-DOB/SHH	5
BP	GO:1903037	regulation of leukocyte cell-cell adhesion	5/40	382/18870	0.00121686219730349	0.0378694368675105	0.0250236157438581	VNN1/ZBTB16/IL1A/HLA-DOB/SHH	5
BP	GO:2000177	regulation of neural precursor cell proliferation	3/40	100/18870	0.00123747431299078	0.0378694368675105	0.0250236157438581	CX3CL1/FZD9/SHH	3
BP	GO:0002053	positive regulation of mesenchymal cell proliferation	2/40	25/18870	0.00127445220227199	0.0378694368675105	0.0250236157438581	SIX1/SHH	2
BP	GO:0006706	steroid catabolic process	2/40	25/18870	0.00127445220227199	0.0378694368675105	0.0250236157438581	SULT1E1/CYP24A1	2
BP	GO:0014856	skeletal muscle cell proliferation	2/40	25/18870	0.00127445220227199	0.0378694368675105	0.0250236157438581	SIX1/SHH	2
BP	GO:0001823	mesonephros development	3/40	103/18870	0.00134749425831864	0.0392390328022388	0.0259286263600682	SIX1/ZBTB16/SHH	3
BP	GO:0050867	positive regulation of cell activation	5/40	396/18870	0.00142694942849226	0.0394692055474199	0.0260807214215889	VNN1/ZBTB16/IL1A/HLA-DOB/SHH	5
BP	GO:0072593	reactive oxygen species metabolic process	4/40	234/18870	0.00148390057360068	0.0394692055474199	0.0260807214215889	XDH/GPX3/CD36/DUOX1	4
BP	GO:0033081	regulation of T cell differentiation in thymus	2/40	27/18870	0.00148711979340216	0.0394692055474199	0.0260807214215889	VNN1/SHH	2
BP	GO:0048745	smooth muscle tissue development	2/40	27/18870	0.00148711979340216	0.0394692055474199	0.0260807214215889	SIX1/SHH	2
BP	GO:0006979	response to oxidative stress	5/40	400/18870	0.00149162082387792	0.0394692055474199	0.0260807214215889	VNN1/GPX3/CD36/IL1A/DUOX1	5
BP	GO:0006766	vitamin metabolic process	3/40	109/18870	0.00158558561011659	0.0394692055474199	0.0260807214215889	VNN1/CYP26A1/CYP24A1	3
BP	GO:0003156	regulation of animal organ formation	2/40	28/18870	0.00159937027973748	0.0394692055474199	0.0260807214215889	SIX1/SHH	2
BP	GO:0031664	regulation of lipopolysaccharide-mediated signaling pathway	2/40	28/18870	0.00159937027973748	0.0394692055474199	0.0260807214215889	CX3CL1/CD36	2
BP	GO:0035116	embryonic hindlimb morphogenesis	2/40	28/18870	0.00159937027973748	0.0394692055474199	0.0260807214215889	ZBTB16/SHH	2
BP	GO:0003401	axis elongation	2/40	29/18870	0.00171554342338697	0.0416305204075238	0.0275088892802753	SIX1/SHH	2
BP	GO:0007159	leukocyte cell-cell adhesion	5/40	419/18870	0.0018288307039314	0.0431075320970498	0.0284848787859337	VNN1/ZBTB16/IL1A/HLA-DOB/SHH	5
BP	GO:0008209	androgen metabolic process	2/40	30/18870	0.00183562293270404	0.0431075320970498	0.0284848787859337	SHH/HSD17B2	2
BP	GO:0045582	positive regulation of T cell differentiation	3/40	116/18870	0.00189482986134717	0.0432192643277044	0.0285587099447092	VNN1/ZBTB16/SHH	3
BP	GO:0030878	thyroid gland development	2/40	31/18870	0.00195959256449514	0.0432192643277044	0.0285587099447092	SIX1/SHH	2
BP	GO:0042744	hydrogen peroxide catabolic process	2/40	31/18870	0.00195959256449514	0.0432192643277044	0.0285587099447092	GPX3/DUOX1	2
BP	GO:0030098	lymphocyte differentiation	5/40	429/18870	0.00202732266665936	0.0432192643277044	0.0285587099447092	VNN1/ZBTB16/IL1A/FZD9/SHH	5
BP	GO:1990748	cellular detoxification	3/40	119/18870	0.0020380717835198	0.0432192643277044	0.0285587099447092	GPX3/CD36/DUOX1	3
BP	GO:0030326	embryonic limb morphogenesis	3/40	120/18870	0.00208727645838697	0.0432192643277044	0.0285587099447092	ZBTB16/LRP4/SHH	3
BP	GO:0035113	embryonic appendage morphogenesis	3/40	120/18870	0.00208727645838697	0.0432192643277044	0.0285587099447092	ZBTB16/LRP4/SHH	3
BP	GO:0010464	regulation of mesenchymal cell proliferation	2/40	32/18870	0.00208743612389575	0.0432192643277044	0.0285587099447092	SIX1/SHH	2
BP	GO:0009636	response to toxic substance	4/40	258/18870	0.00211949687033035	0.0432192643277044	0.0285587099447092	GPX3/CD36/DUOX1/SLC6A14	4
BP	GO:0030278	regulation of ossification	3/40	121/18870	0.00213721636785351	0.0432192643277044	0.0285587099447092	ZBTB16/LRP4/FZD9	3
BP	GO:0019934	cGMP-mediated signaling	2/40	33/18870	0.00221913746424658	0.0440600826218037	0.029114311391215	CD36/HTR2C	2
BP	GO:0010811	positive regulation of cell-substrate adhesion	3/40	123/18870	0.00223931738599826	0.0440600826218037	0.029114311391215	CX3CL1/COL8A1/CD36	3
BP	GO:0001503	ossification	5/40	444/18870	0.00235413432625173	0.045701594386967	0.0301990003395661	ZBTB16/LRP4/CYP24A1/FZD9/SHH	5
BP	GO:1901099	negative regulation of signal transduction in absence of ligand	2/40	35/18870	0.00249404914144774	0.0462179432982754	0.030540196771706	CX3CL1/IL1A	2
BP	GO:2001240	negative regulation of extrinsic apoptotic signaling pathway in absence of ligand	2/40	35/18870	0.00249404914144774	0.0462179432982754	0.030540196771706	CX3CL1/IL1A	2
BP	GO:0001704	formation of primary germ layer	3/40	128/18870	0.00250770434104653	0.0462179432982754	0.030540196771706	COL8A1/DUSP2/LAMB3	3
BP	GO:0097237	cellular response to toxic substance	3/40	128/18870	0.00250770434104653	0.0462179432982754	0.030540196771706	GPX3/CD36/DUOX1	3
BP	GO:0045621	positive regulation of lymphocyte differentiation	3/40	130/18870	0.00262039105618283	0.0474049769215894	0.0313245726621838	VNN1/ZBTB16/SHH	3
BP	GO:0035137	hindlimb morphogenesis	2/40	36/18870	0.00263722742489611	0.0474049769215894	0.0313245726621838	ZBTB16/SHH	2
BP	GO:0002052	positive regulation of neuroblast proliferation	2/40	37/18870	0.00278419938224535	0.0494365158603565	0.032666986333405	CX3CL1/SHH	2
MF	GO:0020037	heme binding	4/43	141/18496	0.000317055237583138	0.0398912191579845	0.0303026081503952	CYP26A1/CYP24A1/DUOX1/STEAP4	4
MF	GO:0046906	tetrapyrrole binding	4/43	151/18496	0.000411249682041078	0.0398912191579845	0.0303026081503952	CYP26A1/CYP24A1/DUOX1/STEAP4	4

## Sheet: KEGG
ID	Description	GeneRatio	BgRatio	pvalue	p.adjust	qvalue	geneID	Count
hsa04640	Hematopoietic cell lineage	45743	99/8847	0.00327170295395838	0.248652169637614	0.224659416426967	CD36/IL1A/HLA-DOB	3
hsa04940	Type I diabetes mellitus	45715	43/8847	0.00749896583446699	0.248652169637614	0.224659416426967	IL1A/HLA-DOB	2
hsa05332	Graft-versus-host disease	45715	44/8847	0.00784135011023158	0.248652169637614	0.224659416426967	IL1A/HLA-DOB	2
hsa04913	Ovarian steroidogenesis	45715	51/8847	0.0104307640860534	0.248652169637614	0.224659416426967	PLA2G4E/HSD17B2	2
hsa04148	Efferocytosis	45743	157/8847	0.0117358080797365	0.248652169637614	0.224659416426967	CX3CL1/DUSP2/CD36	3
hsa00140	Steroid hormone biosynthesis	45715	62/8847	0.0151552488479453	0.248652169637614	0.224659416426967	SULT1E1/HSD17B2	2
hsa05217	Basal cell carcinoma	45715	63/8847	0.0156229254073798	0.248652169637614	0.224659416426967	FZD9/SHH	2
hsa05321	Inflammatory bowel disease	45715	65/8847	0.0165768113091743	0.248652169637614	0.224659416426967	IL1A/HLA-DOB	2
hsa04918	Thyroid hormone synthesis	45715	75/8847	0.0217068269627921	0.273633753897885	0.247230496942826	GPX3/DUOX1	2
hsa05140	Leishmaniasis	45715	77/8847	0.0228028128248238	0.273633753897885	0.247230496942826	IL1A/HLA-DOB	2
hsa04512	ECM-receptor interaction	45715	89/8847	0.0298436934383058	0.311044465966963	0.281031403461379	CD36/LAMB3	2
hsa05323	Rheumatoid arthritis	45715	94/8847	0.033002971017924	0.311044465966963	0.281031403461379	IL1A/HLA-DOB	2
hsa04750	Inflammatory mediator regulation of TRP channels	45715	99/8847	0.036288521029479	0.311044465966963	0.281031403461379	PLA2G4E/HTR2C	2
hsa05231	Choline metabolism in cancer	45715	99/8847	0.036288521029479	0.311044465966963	0.281031403461379	PLA2G4E/DGKG	2
hsa00564	Glycerophospholipid metabolism	45715	103/8847	0.0390050175063172	0.312040140050537	0.281931003729872	PLA2G4E/DGKG	2
hsa05145	Toxoplasmosis	45715	111/8847	0.0446637867349476	0.334978400512107	0.302655923269711	HLA-DOB/LAMB3	2
hsa04726	Serotonergic synapse	45715	115/8847	0.047601901437761	0.336013421913607	0.303591074185101	PLA2G4E/HTR2C	2
