# Supplementary material for: Integrated multi-omics analysis to investigate the pathogenesis of intrauterine adhesion
Source: Research Square preprint supplement (doi:10.21203/rs.3.rs-7079007/v1), 2025-08-08
Supplement: Supplementary file 11 [file e97161806066b889d2c3ddaa.xlsx]

## Sheet: 05.lncrna
mRNA	miRNA	lncRNA
DUSP2	hsa-miR-106a-5p	AL158206.1
DUSP2	hsa-miR-106a-5p	EPB41L4A-AS1
DUSP2	hsa-miR-106a-5p	H19
DUSP2	hsa-miR-106a-5p	AC004656.1
DUSP2	hsa-miR-106a-5p	AC021078.1
DUSP2	hsa-miR-106a-5p	AC021092.1
DUSP2	hsa-miR-106a-5p	ARHGAP27P1-BPTFP1-KPNA2P3
DUSP2	hsa-miR-106a-5p	SNHG16
DUSP2	hsa-miR-106a-5p	AC243964.3
DUSP2	hsa-miR-106a-5p	AC005261.1
DUSP2	hsa-miR-106a-5p	MALAT1
DUSP2	hsa-miR-106a-5p	XIST
DUSP2	hsa-miR-106b-5p	AC005261.1
DUSP2	hsa-miR-106b-5p	ARHGAP27P1-BPTFP1-KPNA2P3
DUSP2	hsa-miR-106b-5p	EPB41L4A-AS1
DUSP2	hsa-miR-106b-5p	AC004656.1
DUSP2	hsa-miR-106b-5p	MALAT1
DUSP2	hsa-miR-106b-5p	AC021092.1
DUSP2	hsa-miR-106b-5p	AC243964.3
DUSP2	hsa-miR-106b-5p	SNHG16
DUSP2	hsa-miR-106b-5p	AC021078.1
DUSP2	hsa-miR-106b-5p	XIST
DUSP2	hsa-miR-106b-5p	AL158206.1
DUSP2	hsa-miR-106b-5p	H19
SIX1	hsa-miR-185-5p	NEAT1
SIX1	hsa-miR-185-5p	MALAT1
SIX1	hsa-miR-185-5p	AC007952.4
SIX1	hsa-miR-185-5p	AC018628.1
SIX1	hsa-miR-185-5p	MIR663AHG
DUSP2	hsa-miR-20a-5p	AC021092.1
DUSP2	hsa-miR-20a-5p	AC243964.3
DUSP2	hsa-miR-20a-5p	SNHG16
DUSP2	hsa-miR-20a-5p	AC005261.1
DUSP2	hsa-miR-20a-5p	ARHGAP27P1-BPTFP1-KPNA2P3
DUSP2	hsa-miR-20a-5p	H19
DUSP2	hsa-miR-20a-5p	MALAT1
DUSP2	hsa-miR-20a-5p	XIST
DUSP2	hsa-miR-20a-5p	AL158206.1
DUSP2	hsa-miR-20a-5p	EPB41L4A-AS1
DUSP2	hsa-miR-20a-5p	AC004656.1
DUSP2	hsa-miR-20a-5p	AC021078.1
DUSP2	hsa-miR-302a-3p	AC004656.1
DUSP2	hsa-miR-302a-3p	NEAT1
DUSP2	hsa-miR-302a-3p	FGD5-AS1
DUSP2	hsa-miR-302a-3p	ARHGAP27P1-BPTFP1-KPNA2P3
DUSP2	hsa-miR-302a-3p	AC005261.1
DUSP2	hsa-miR-302a-3p	MIR17HG
DUSP2	hsa-miR-302a-3p	SNHG16
HTR2C	hsa-miR-342-3p	NEAT1
HTR2C	hsa-miR-342-3p	AL356488.2
HTR2C	hsa-miR-342-3p	XIST
HTR2C	hsa-miR-342-3p	AC021078.1
HTR2C	hsa-miR-342-3p	AC016876.2
HTR2C	hsa-miR-342-3p	SNHG20
HTR2C	hsa-miR-34a-5p	NEAT1
HTR2C	hsa-miR-34a-5p	AC116913.1
HTR2C	hsa-miR-34a-5p	AC018628.1
HTR2C	hsa-miR-34a-5p	SNHG7
HTR2C	hsa-miR-34c-5p	NEAT1
HTR2C	hsa-miR-34c-5p	SNHG7
HTR2C	hsa-miR-34c-5p	AC116913.1
HTR2C	hsa-miR-34c-5p	AC018628.1
DUSP2	hsa-miR-372-3p	MIR17HG
DUSP2	hsa-miR-372-3p	AC005261.1
DUSP2	hsa-miR-372-3p	ARHGAP27P1-BPTFP1-KPNA2P3
DUSP2	hsa-miR-372-3p	SNHG16
DUSP2	hsa-miR-372-3p	AC004656.1
DUSP2	hsa-miR-372-3p	FGD5-AS1
DUSP2	hsa-miR-372-3p	NEAT1
HTR2C	hsa-miR-374c-5p	NEAT1
HTR2C	hsa-miR-374c-5p	MALAT1
HTR2C	hsa-miR-374c-5p	LINC02001
HTR2C	hsa-miR-374c-5p	NORAD
DUSP2	hsa-miR-410-3p	NORAD
DUSP2	hsa-miR-410-3p	LRRC75A-AS1
SIX1	hsa-miR-4306	NEAT1
SIX1	hsa-miR-4306	MALAT1
SIX1	hsa-miR-4306	AC018628.1
SIX1	hsa-miR-4306	AC007952.4
SIX1	hsa-miR-4306	MIR663AHG
HTR2C	hsa-miR-449a	NEAT1
HTR2C	hsa-miR-449a	SNHG7
HTR2C	hsa-miR-449a	AC018628.1
HTR2C	hsa-miR-449a	AC116913.1
HTR2C	hsa-miR-449b-5p	SNHG7
HTR2C	hsa-miR-449b-5p	AC116913.1
HTR2C	hsa-miR-449b-5p	NEAT1
HTR2C	hsa-miR-449b-5p	AC018628.1
POF1B	hsa-miR-494-3p	NEAT1
POF1B	hsa-miR-494-3p	MALAT1
HTR2C	hsa-miR-495-3p	AC051619.8
HTR2C	hsa-miR-495-3p	NEAT1
HTR2C	hsa-miR-495-3p	AC006511.3
HTR2C	hsa-miR-495-3p	ARHGAP27P1-BPTFP1-KPNA2P3
DUSP2	hsa-miR-519d-3p	MALAT1
DUSP2	hsa-miR-519d-3p	H19
DUSP2	hsa-miR-519d-3p	ARHGAP27P1-BPTFP1-KPNA2P3
DUSP2	hsa-miR-519d-3p	SNHG16
DUSP2	hsa-miR-519d-3p	AC021092.1
DUSP2	hsa-miR-519d-3p	AC243964.3
DUSP2	hsa-miR-519d-3p	AL158206.1
DUSP2	hsa-miR-519d-3p	AC005261.1
DUSP2	hsa-miR-519d-3p	AC004656.1
DUSP2	hsa-miR-519d-3p	XIST
DUSP2	hsa-miR-519d-3p	EPB41L4A-AS1
DUSP2	hsa-miR-519d-3p	AC021078.1
DUSP2	hsa-miR-520a-3p	NEAT1
DUSP2	hsa-miR-520a-3p	ARHGAP27P1-BPTFP1-KPNA2P3
DUSP2	hsa-miR-520a-3p	AC005261.1
DUSP2	hsa-miR-520a-3p	AC004656.1
DUSP2	hsa-miR-520a-3p	MIR17HG
DUSP2	hsa-miR-520a-3p	FGD5-AS1
DUSP2	hsa-miR-520a-3p	SNHG16
DUSP2	hsa-miR-520c-3p	NEAT1
DUSP2	hsa-miR-520c-3p	FGD5-AS1
DUSP2	hsa-miR-520c-3p	ARHGAP27P1-BPTFP1-KPNA2P3
DUSP2	hsa-miR-520c-3p	SNHG16
DUSP2	hsa-miR-520c-3p	AC005261.1
DUSP2	hsa-miR-520c-3p	AC004656.1
DUSP2	hsa-miR-520c-3p	MIR17HG
DUSP2	hsa-miR-520d-3p	SNHG16
DUSP2	hsa-miR-520d-3p	ARHGAP27P1-BPTFP1-KPNA2P3
DUSP2	hsa-miR-520d-3p	AC005261.1
DUSP2	hsa-miR-520d-3p	AC004656.1
DUSP2	hsa-miR-520d-3p	FGD5-AS1
DUSP2	hsa-miR-520d-3p	MIR17HG
DUSP2	hsa-miR-520d-3p	NEAT1
DUSP2	hsa-miR-526b-3p	XIST
DUSP2	hsa-miR-526b-3p	AC004656.1
DUSP2	hsa-miR-526b-3p	MALAT1
DUSP2	hsa-miR-526b-3p	AL158206.1
DUSP2	hsa-miR-526b-3p	H19
DUSP2	hsa-miR-526b-3p	EPB41L4A-AS1
DUSP2	hsa-miR-526b-3p	AC021078.1
DUSP2	hsa-miR-526b-3p	ARHGAP27P1-BPTFP1-KPNA2P3
DUSP2	hsa-miR-526b-3p	SNHG16
DUSP2	hsa-miR-526b-3p	AC021092.1
DUSP2	hsa-miR-526b-3p	AC243964.3
DUSP2	hsa-miR-526b-3p	AC005261.1
IL1A	hsa-miR-543	OIP5-AS1
IL1A	hsa-miR-543	NORAD
IL1A	hsa-miR-543	SNHG7
IL1A	hsa-miR-543	NEAT1
HTR2C	hsa-miR-5688	NEAT1
HTR2C	hsa-miR-5688	AC006511.3
HTR2C	hsa-miR-5688	AC051619.8
HTR2C	hsa-miR-5688	ARHGAP27P1-BPTFP1-KPNA2P3
HTR2C	hsa-miR-655-3p	NEAT1
HTR2C	hsa-miR-655-3p	MALAT1
HTR2C	hsa-miR-655-3p	LINC02001
HTR2C	hsa-miR-655-3p	NORAD
