# Supplementary material for: Integrated multi-omics analysis to investigate the pathogenesis of intrauterine adhesion
Source: Research Square preprint supplement (doi:10.21203/rs.3.rs-7079007/v1), 2025-08-08
Supplement: Supplementary file 12 [file ea08d39bf4b1331ebc12f3fb.xlsx]

## Sheet: 01.mirdb
	database	mature_mirna_acc	mature_mirna_id	target_symbol	target_entrez	target_ensembl	score	type	miRNA
1342	mirdb	MIMAT0022484	hsa-miR-5692a	SIX1	6495	ENSG00000126778	99.4685988675591	predicted	hsa-miR-5692a_SIX1
1343	mirdb	MIMAT0019003	hsa-miR-4476	HTR2C	3358	ENSG00000147246	99.4494591181065	predicted	hsa-miR-4476_HTR2C
1344	mirdb	MIMAT0019793	hsa-miR-4698	HTR2C	3358	ENSG00000147246	99.3632391960084	predicted	hsa-miR-4698_HTR2C
1345	mirdb	MIMAT0027652	hsa-miR-6876-5p	HTR2C	3358	ENSG00000147246	99.2129225727232	predicted	hsa-miR-6876-5p_HTR2C
1346	mirdb	MIMAT0019072	hsa-miR-4533	HTR2C	3358	ENSG00000147246	99.2041	predicted	hsa-miR-4533_HTR2C
1347	mirdb	MIMAT0019072	hsa-miR-4533	HTR2C	3358	ENSG00000147246	99.1114721660872	predicted	hsa-miR-4533_HTR2C
1348	mirdb	MIMAT0019795	hsa-miR-4699-3p	HTR2C	3358	ENSG00000147246	98.6112303421728	predicted	hsa-miR-4699-3p_HTR2C
1349	mirdb	MIMAT0003332	hsa-miR-656-3p	POF1B	79983	ENSG00000124429	98.5640389885811	predicted	hsa-miR-656-3p_POF1B
1350	mirdb	MIMAT0030990	hsa-miR-8063	HTR2C	3358	ENSG00000147246	98.2029901364642	predicted	hsa-miR-8063_HTR2C
1351	mirdb	MIMAT0014998	hsa-miR-3133	POF1B	79983	ENSG00000124429	98.1335	predicted	hsa-miR-3133_POF1B
1352	mirdb	MIMAT0004954	hsa-miR-543	IL1A	3552	ENSG00000115008	98.1040395611016	predicted	hsa-miR-543_IL1A
1353	mirdb	MIMAT0019793	hsa-miR-4698	HTR2C	3358	ENSG00000147246	97.8409263802411	predicted	hsa-miR-4698_HTR2C
1354	mirdb	MIMAT0019003	hsa-miR-4476	HTR2C	3358	ENSG00000147246	97.7283822522994	predicted	hsa-miR-4476_HTR2C
1355	mirdb	MIMAT0018113	hsa-miR-3685	HTR2C	3358	ENSG00000147246	97.6081	predicted	hsa-miR-3685_HTR2C
1356	mirdb	MIMAT0018113	hsa-miR-3685	HTR2C	3358	ENSG00000147246	97.5893	predicted	hsa-miR-3685_HTR2C
1357	mirdb	MIMAT0018083	hsa-miR-3662	IL1A	3552	ENSG00000115008	97.3168181553053	predicted	hsa-miR-3662_IL1A
1358	mirdb	MIMAT0000716	hsa-miR-302c-5p	HTR2C	3358	ENSG00000147246	97.2591070227016	predicted	hsa-miR-302c-5p_HTR2C
1359	mirdb	MIMAT0000716	hsa-miR-302c-5p	HTR2C	3358	ENSG00000147246	97.0209	predicted	hsa-miR-302c-5p_HTR2C
1360	mirdb	MIMAT0027652	hsa-miR-6876-5p	HTR2C	3358	ENSG00000147246	96.7009566956469	predicted	hsa-miR-6876-5p_HTR2C
1361	mirdb	MIMAT0001630	hsa-miR-323b-5p	IL1A	3552	ENSG00000115008	96.1224	predicted	hsa-miR-323b-5p_IL1A
1362	mirdb	MIMAT0026558	hsa-miR-410-5p	IL1A	3552	ENSG00000115008	96.1224	predicted	hsa-miR-410-5p_IL1A
1363	mirdb	MIMAT0015021	hsa-miR-3148	POF1B	79983	ENSG00000124429	95.9514724559205	predicted	hsa-miR-3148_POF1B
1364	mirdb	MIMAT0019832	hsa-miR-4719	HTR2C	3358	ENSG00000147246	95.8257088345891	predicted	hsa-miR-4719_HTR2C
1365	mirdb	MIMAT0026607	hsa-miR-494-5p	IL1A	3552	ENSG00000115008	95.314	predicted	hsa-miR-494-5p_IL1A
1366	mirdb	MIMAT0001075	hsa-miR-384	HTR2C	3358	ENSG00000147246	94.9947	predicted	hsa-miR-384_HTR2C
1367	mirdb	MIMAT0000075	hsa-miR-20a-5p	DUSP2	1844	ENSG00000158050	94.7274	predicted	hsa-miR-20a-5p_DUSP2
1368	mirdb	MIMAT0000680	hsa-miR-106b-5p	DUSP2	1844	ENSG00000158050	94.7274	predicted	hsa-miR-106b-5p_DUSP2
1369	mirdb	MIMAT0027378	hsa-miR-6738-3p	DUSP2	1844	ENSG00000158050	94.6801	predicted	hsa-miR-6738-3p_DUSP2
1370	mirdb	MIMAT0024597	hsa-miR-6124	POF1B	79983	ENSG00000124429	94.6742337003434	predicted	hsa-miR-6124_POF1B
1371	mirdb	MIMAT0000087	hsa-miR-30a-5p	SIX1	6495	ENSG00000126778	94.6718	predicted	hsa-miR-30a-5p_SIX1
1372	mirdb	MIMAT0000692	hsa-miR-30e-5p	SIX1	6495	ENSG00000126778	94.6718	predicted	hsa-miR-30e-5p_SIX1
1373	mirdb	MIMAT0000244	hsa-miR-30c-5p	SIX1	6495	ENSG00000126778	94.6718	predicted	hsa-miR-30c-5p_SIX1
1374	mirdb	MIMAT0000245	hsa-miR-30d-5p	SIX1	6495	ENSG00000126778	94.6718	predicted	hsa-miR-30d-5p_SIX1
1375	mirdb	MIMAT0000420	hsa-miR-30b-5p	SIX1	6495	ENSG00000126778	94.6718	predicted	hsa-miR-30b-5p_SIX1
1376	mirdb	MIMAT0005788	hsa-miR-513b-5p	HTR2C	3358	ENSG00000147246	94.4594	predicted	hsa-miR-513b-5p_HTR2C
1377	mirdb	MIMAT0009979	hsa-miR-2054	POF1B	79983	ENSG00000124429	94.3727733663231	predicted	hsa-miR-2054_POF1B
1378	mirdb	MIMAT0015012	hsa-miR-3143	POF1B	79983	ENSG00000124429	94.3065	predicted	hsa-miR-3143_POF1B
1379	mirdb	MIMAT0004907	hsa-miR-892a	HTR2C	3358	ENSG00000147246	94.2414	predicted	hsa-miR-892a_HTR2C
1380	mirdb	MIMAT0027536	hsa-miR-6818-5p	HTR2C	3358	ENSG00000147246	94.216	predicted	hsa-miR-6818-5p_HTR2C
1381	mirdb	MIMAT0027563	hsa-miR-6831-3p	IL1A	3552	ENSG00000115008	94.1894	predicted	hsa-miR-6831-3p_IL1A
1382	mirdb	MIMAT0004752	hsa-miR-20b-3p	HTR2C	3358	ENSG00000147246	94.0818211594721	predicted	hsa-miR-20b-3p_HTR2C
1383	mirdb	MIMAT0022978	hsa-miR-4743-3p	SIX1	6495	ENSG00000126778	94.0703	predicted	hsa-miR-4743-3p_SIX1
1384	mirdb	MIMAT0022259	hsa-miR-5100	HTR2C	3358	ENSG00000147246	94.0059	predicted	hsa-miR-5100_HTR2C
1385	mirdb	MIMAT0019795	hsa-miR-4699-3p	HTR2C	3358	ENSG00000147246	94.0003310191885	predicted	hsa-miR-4699-3p_HTR2C
1386	mirdb	MIMAT0026638	hsa-miR-1468-3p	IL1A	3552	ENSG00000115008	93.9541	predicted	hsa-miR-1468-3p_IL1A
1387	mirdb	MIMAT0004911	hsa-miR-874-3p	HTR2C	3358	ENSG00000147246	93.857	predicted	hsa-miR-874-3p_HTR2C
1388	mirdb	MIMAT0027536	hsa-miR-6818-5p	HTR2C	3358	ENSG00000147246	93.854	predicted	hsa-miR-6818-5p_HTR2C
1389	mirdb	MIMAT0016858	hsa-miR-4306	SIX1	6495	ENSG00000126778	93.8385	predicted	hsa-miR-4306_SIX1
1390	mirdb	MIMAT0000717	hsa-miR-302c-3p	DUSP2	1844	ENSG00000158050	93.8109	predicted	hsa-miR-302c-3p_DUSP2
1391	mirdb	MIMAT0005931	hsa-miR-302e	DUSP2	1844	ENSG00000158050	93.8109	predicted	hsa-miR-302e_DUSP2
1392	mirdb	MIMAT0022303	hsa-miR-548av-5p	HTR2C	3358	ENSG00000147246	93.7546	predicted	hsa-miR-548av-5p_HTR2C
1393	mirdb	MIMAT0005882	hsa-miR-548k	HTR2C	3358	ENSG00000147246	93.7546	predicted	hsa-miR-548k_HTR2C
1394	mirdb	MIMAT0030981	hsa-miR-8054	HTR2C	3358	ENSG00000147246	93.7546	predicted	hsa-miR-8054_HTR2C
1395	mirdb	MIMAT0016894	hsa-miR-4262	IL1A	3552	ENSG00000115008	93.7294	predicted	hsa-miR-4262_IL1A
1396	mirdb	MIMAT0004558	hsa-miR-181a-2-3p	HTR2C	3358	ENSG00000147246	93.7062	predicted	hsa-miR-181a-2-3p_HTR2C
1397	mirdb	MIMAT0023708	hsa-miR-6083	HTR2C	3358	ENSG00000147246	93.6995168087321	predicted	hsa-miR-6083_HTR2C
1398	mirdb	MIMAT0004801	hsa-miR-590-3p	SIX1	6495	ENSG00000126778	93.6956125913615	predicted	hsa-miR-590-3p_SIX1
1399	mirdb	MIMAT0016860	hsa-miR-4307	POF1B	79983	ENSG00000124429	93.3982954560711	predicted	hsa-miR-4307_POF1B
1400	mirdb	MIMAT0019797	hsa-miR-4700-3p	HTR2C	3358	ENSG00000147246	93.331	predicted	hsa-miR-4700-3p_HTR2C
1401	mirdb	MIMAT0039322	hsa-miR-9902	IL1A	3552	ENSG00000115008	93.2948929335248	predicted	hsa-miR-9902_IL1A
1402	mirdb	MIMAT0000070	hsa-miR-17-5p	DUSP2	1844	ENSG00000158050	93.0699	predicted	hsa-miR-17-5p_DUSP2
1403	mirdb	MIMAT0000103	hsa-miR-106a-5p	DUSP2	1844	ENSG00000158050	93.0699	predicted	hsa-miR-106a-5p_DUSP2
1404	mirdb	MIMAT0000093	hsa-miR-93-5p	DUSP2	1844	ENSG00000158050	93.0699	predicted	hsa-miR-93-5p_DUSP2
1405	mirdb	MIMAT0001413	hsa-miR-20b-5p	DUSP2	1844	ENSG00000158050	93.0699	predicted	hsa-miR-20b-5p_DUSP2
1406	mirdb	MIMAT0002836	hsa-miR-526b-3p	DUSP2	1844	ENSG00000158050	93.0699	predicted	hsa-miR-526b-3p_DUSP2
1407	mirdb	MIMAT0002853	hsa-miR-519d-3p	DUSP2	1844	ENSG00000158050	93.0699	predicted	hsa-miR-519d-3p_DUSP2
1408	mirdb	MIMAT0000726	hsa-miR-373-3p	DUSP2	1844	ENSG00000158050	93.0196	predicted	hsa-miR-373-3p_DUSP2
1409	mirdb	MIMAT0000718	hsa-miR-302d-3p	DUSP2	1844	ENSG00000158050	93.0196	predicted	hsa-miR-302d-3p_DUSP2
1410	mirdb	MIMAT0002846	hsa-miR-520c-3p	DUSP2	1844	ENSG00000158050	93.0196	predicted	hsa-miR-520c-3p_DUSP2
1411	mirdb	MIMAT0000684	hsa-miR-302a-3p	DUSP2	1844	ENSG00000158050	93.0196	predicted	hsa-miR-302a-3p_DUSP2
1412	mirdb	MIMAT0000715	hsa-miR-302b-3p	DUSP2	1844	ENSG00000158050	93.0196	predicted	hsa-miR-302b-3p_DUSP2
1413	mirdb	MIMAT0002834	hsa-miR-520a-3p	DUSP2	1844	ENSG00000158050	93.0196	predicted	hsa-miR-520a-3p_DUSP2
1414	mirdb	MIMAT0002856	hsa-miR-520d-3p	DUSP2	1844	ENSG00000158050	93.0196	predicted	hsa-miR-520d-3p_DUSP2
1415	mirdb	MIMAT0000724	hsa-miR-372-3p	DUSP2	1844	ENSG00000158050	93.0196	predicted	hsa-miR-372-3p_DUSP2
1416	mirdb	MIMAT0002843	hsa-miR-520b-3p	DUSP2	1844	ENSG00000158050	93.0196	predicted	hsa-miR-520b-3p_DUSP2
1417	mirdb	MIMAT0002825	hsa-miR-520e-3p	DUSP2	1844	ENSG00000158050	93.0196	predicted	hsa-miR-520e-3p_DUSP2
1418	mirdb	MIMAT0000753	hsa-miR-342-3p	HTR2C	3358	ENSG00000147246	92.9859663862072	predicted	hsa-miR-342-3p_HTR2C
1419	mirdb	MIMAT0000455	hsa-miR-185-5p	SIX1	6495	ENSG00000126778	92.8602	predicted	hsa-miR-185-5p_SIX1
1420	mirdb	MIMAT0019704	hsa-miR-4644	SIX1	6495	ENSG00000126778	92.8602	predicted	hsa-miR-4644_SIX1
1421	mirdb	MIMAT0026476	hsa-miR-215-3p	SIX1	6495	ENSG00000126778	92.6181	predicted	hsa-miR-215-3p_SIX1
1422	mirdb	MIMAT0005457	hsa-miR-518a-5p	HTR2C	3358	ENSG00000147246	92.3293	predicted	hsa-miR-518a-5p_HTR2C
1423	mirdb	MIMAT0002862	hsa-miR-527	HTR2C	3358	ENSG00000147246	92.3293	predicted	hsa-miR-527_HTR2C
1424	mirdb	MIMAT0002813	hsa-miR-493-5p	IL1A	3552	ENSG00000115008	92.2542	predicted	hsa-miR-493-5p_IL1A
1425	mirdb	MIMAT0041617	hsa-miR-10393-5p	HTR2C	3358	ENSG00000147246	92.2459	predicted	hsa-miR-10393-5p_HTR2C
1426	mirdb	MIMAT0041993	hsa-miR-9983-3p	ICAM4	3386	ENSG00000105371	92.1079	predicted	hsa-miR-9983-3p_ICAM4
1427	mirdb	MIMAT0000257	hsa-miR-181b-5p	IL1A	3552	ENSG00000115008	91.793	predicted	hsa-miR-181b-5p_IL1A
1428	mirdb	MIMAT0000256	hsa-miR-181a-5p	IL1A	3552	ENSG00000115008	91.793	predicted	hsa-miR-181a-5p_IL1A
1429	mirdb	MIMAT0000258	hsa-miR-181c-5p	IL1A	3552	ENSG00000115008	91.793	predicted	hsa-miR-181c-5p_IL1A
1430	mirdb	MIMAT0002821	hsa-miR-181d-5p	IL1A	3552	ENSG00000115008	91.793	predicted	hsa-miR-181d-5p_IL1A
1431	mirdb	MIMAT0041993	hsa-miR-9983-3p	ICAM4	3386	ENSG00000105371	91.6205	predicted	hsa-miR-9983-3p_ICAM4
1432	mirdb	MIMAT0022303	hsa-miR-548av-5p	HTR2C	3358	ENSG00000147246	91.6093	predicted	hsa-miR-548av-5p_HTR2C
1433	mirdb	MIMAT0005882	hsa-miR-548k	HTR2C	3358	ENSG00000147246	91.6093	predicted	hsa-miR-548k_HTR2C
1434	mirdb	MIMAT0030981	hsa-miR-8054	HTR2C	3358	ENSG00000147246	91.6093	predicted	hsa-miR-8054_HTR2C
1435	mirdb	MIMAT0002849	hsa-miR-524-5p	IL1A	3552	ENSG00000115008	91.528	predicted	hsa-miR-524-5p_IL1A
1436	mirdb	MIMAT0002855	hsa-miR-520d-5p	IL1A	3552	ENSG00000115008	91.528	predicted	hsa-miR-520d-5p_IL1A
1437	mirdb	MIMAT0019070	hsa-miR-4531	CX3CL1	6376	ENSG00000006210	91.3395	predicted	hsa-miR-4531_CX3CL1
1438	mirdb	MIMAT0001075	hsa-miR-384	HTR2C	3358	ENSG00000147246	91.2326	predicted	hsa-miR-384_HTR2C
1439	mirdb	MIMAT0018080	hsa-miR-3659	POF1B	79983	ENSG00000124429	91.1426	predicted	hsa-miR-3659_POF1B
1440	mirdb	MIMAT0027496	hsa-miR-6798-5p	CX3CL1	6376	ENSG00000006210	91.0379	predicted	hsa-miR-6798-5p_CX3CL1
1441	mirdb	MIMAT0004911	hsa-miR-874-3p	HTR2C	3358	ENSG00000147246	90.9632	predicted	hsa-miR-874-3p_HTR2C
1442	mirdb	MIMAT0023697	hsa-miR-6072	SIX1	6495	ENSG00000126778	90.8926	predicted	hsa-miR-6072_SIX1
1443	mirdb	MIMAT0022720	hsa-miR-1304-3p	HTR2C	3358	ENSG00000147246	90.8849	predicted	hsa-miR-1304-3p_HTR2C
1444	mirdb	MIMAT0004752	hsa-miR-20b-3p	HTR2C	3358	ENSG00000147246	90.8763166802041	predicted	hsa-miR-20b-3p_HTR2C
1445	mirdb	MIMAT0004907	hsa-miR-892a	HTR2C	3358	ENSG00000147246	90.862	predicted	hsa-miR-892a_HTR2C
1446	mirdb	MIMAT0030990	hsa-miR-8063	HTR2C	3358	ENSG00000147246	90.816032546221	predicted	hsa-miR-8063_HTR2C
1447	mirdb	MIMAT0004658	hsa-miR-155-3p	HTR2C	3358	ENSG00000147246	90.7628	predicted	hsa-miR-155-3p_HTR2C
1448	mirdb	MIMAT0027533	hsa-miR-6816-3p	HTR2C	3358	ENSG00000147246	90.5735	predicted	hsa-miR-6816-3p_HTR2C
1449	mirdb	MIMAT0000273	hsa-miR-216a-5p	HTR2C	3358	ENSG00000147246	90.5557	predicted	hsa-miR-216a-5p_HTR2C
1450	mirdb	MIMAT0013771	hsa-miR-449c-3p	HTR2C	3358	ENSG00000147246	90.4875	predicted	hsa-miR-449c-3p_HTR2C
1451	mirdb	MIMAT0000419	hsa-miR-27b-3p	SIX1	6495	ENSG00000126778	90.3879	predicted	hsa-miR-27b-3p_SIX1
1452	mirdb	MIMAT0000084	hsa-miR-27a-3p	SIX1	6495	ENSG00000126778	90.3879	predicted	hsa-miR-27a-3p_SIX1
1453	mirdb	MIMAT0039763	hsa-miR-9985	SIX1	6495	ENSG00000126778	90.3879	predicted	hsa-miR-9985_SIX1
1454	mirdb	MIMAT0004558	hsa-miR-181a-2-3p	HTR2C	3358	ENSG00000147246	90.3542	predicted	hsa-miR-181a-2-3p_HTR2C
1455	mirdb	MIMAT0027683	hsa-miR-6891-3p	SIX1	6495	ENSG00000126778	90.2763	predicted	hsa-miR-6891-3p_SIX1
1456	mirdb	MIMAT0003164	hsa-miR-544a	DUSP2	1844	ENSG00000158050	90.0851	predicted	hsa-miR-544a_DUSP2
1457	mirdb	MIMAT0026472	hsa-let-7c-3p	SIX1	6495	ENSG00000126778	90.005	predicted	hsa-let-7c-3p_SIX1
1458	mirdb	MIMAT0004185	hsa-miR-802	SIX1	6495	ENSG00000126778	89.9835	predicted	hsa-miR-802_SIX1
1459	mirdb	MIMAT0022493	hsa-miR-5700	POF1B	79983	ENSG00000124429	89.8326	predicted	hsa-miR-5700_POF1B
1460	mirdb	MIMAT0005576	hsa-miR-1226-5p	SIX1	6495	ENSG00000126778	89.7293	predicted	hsa-miR-1226-5p_SIX1
1461	mirdb	MIMAT0019054	hsa-miR-4517	SIX1	6495	ENSG00000126778	89.6125	predicted	hsa-miR-4517_SIX1
1462	mirdb	MIMAT0004703	hsa-miR-335-3p	HTR2C	3358	ENSG00000147246	89.5845085217109	predicted	hsa-miR-335-3p_HTR2C
1463	mirdb	MIMAT0026472	hsa-let-7c-3p	POF1B	79983	ENSG00000124429	89.5761	predicted	hsa-let-7c-3p_POF1B
1464	mirdb	MIMAT0027533	hsa-miR-6816-3p	HTR2C	3358	ENSG00000147246	89.506	predicted	hsa-miR-6816-3p_HTR2C
1465	mirdb	MIMAT0019928	hsa-miR-4773	POF1B	79983	ENSG00000124429	89.4346	predicted	hsa-miR-4773_POF1B
1466	mirdb	MIMAT0019770	hsa-miR-4684-3p	HTR2C	3358	ENSG00000147246	89.3402592243186	predicted	hsa-miR-4684-3p_HTR2C
1467	mirdb	MIMAT0022720	hsa-miR-1304-3p	HTR2C	3358	ENSG00000147246	89.219	predicted	hsa-miR-1304-3p_HTR2C
1468	mirdb	MIMAT0019928	hsa-miR-4773	HTR2C	3358	ENSG00000147246	89.1921	predicted	hsa-miR-4773_HTR2C
1469	mirdb	MIMAT0000685	hsa-miR-34b-5p	HTR2C	3358	ENSG00000147246	89.1646	predicted	hsa-miR-34b-5p_HTR2C
1470	mirdb	MIMAT0010251	hsa-miR-449c-5p	HTR2C	3358	ENSG00000147246	89.1646	predicted	hsa-miR-449c-5p_HTR2C
1471	mirdb	MIMAT0013517	hsa-miR-2682-5p	HTR2C	3358	ENSG00000147246	89.1646	predicted	hsa-miR-2682-5p_HTR2C
1472	mirdb	MIMAT0019362	hsa-miR-3977	POF1B	79983	ENSG00000124429	89.0995	predicted	hsa-miR-3977_POF1B
1473	mirdb	MIMAT0026734	hsa-miR-942-3p	HTR2C	3358	ENSG00000147246	88.8764	predicted	hsa-miR-942-3p_HTR2C
1474	mirdb	MIMAT0000435	hsa-miR-143-3p	HTR2C	3358	ENSG00000147246	88.785	predicted	hsa-miR-143-3p_HTR2C
1475	mirdb	MIMAT0019924	hsa-miR-4770	HTR2C	3358	ENSG00000147246	88.785	predicted	hsa-miR-4770_HTR2C
1476	mirdb	MIMAT0004701	hsa-miR-338-5p	SIX1	6495	ENSG00000126778	88.7811	predicted	hsa-miR-338-5p_SIX1
1477	mirdb	MIMAT0031179	hsa-miR-7976	HTR2C	3358	ENSG00000147246	88.7706	predicted	hsa-miR-7976_HTR2C
1478	mirdb	MIMAT0000242	hsa-miR-129-5p	ICAM4	3386	ENSG00000105371	88.5884	predicted	hsa-miR-129-5p_ICAM4
1479	mirdb	MIMAT0018116	hsa-miR-3688-3p	POF1B	79983	ENSG00000124429	88.5535	predicted	hsa-miR-3688-3p_POF1B
1480	mirdb	MIMAT0004703	hsa-miR-335-3p	HTR2C	3358	ENSG00000147246	88.4931228551033	predicted	hsa-miR-335-3p_HTR2C
1481	mirdb	MIMAT0026734	hsa-miR-942-3p	HTR2C	3358	ENSG00000147246	88.4627	predicted	hsa-miR-942-3p_HTR2C
1482	mirdb	MIMAT0004610	hsa-miR-150-3p	SIX1	6495	ENSG00000126778	88.4347	predicted	hsa-miR-150-3p_SIX1
1483	mirdb	MIMAT0049016	hsa-miR-12122	DUSP2	1844	ENSG00000158050	88.412	predicted	hsa-miR-12122_DUSP2
1484	mirdb	MIMAT0003235	hsa-miR-570-3p	SIX1	6495	ENSG00000126778	88.3724	predicted	hsa-miR-570-3p_SIX1
1485	mirdb	MIMAT0018165	hsa-miR-3714	HTR2C	3358	ENSG00000147246	88.2473	predicted	hsa-miR-3714_HTR2C
1486	mirdb	MIMAT0004777	hsa-miR-513a-3p	HTR2C	3358	ENSG00000147246	88.1877169698451	predicted	hsa-miR-513a-3p_HTR2C
1487	mirdb	MIMAT0022728	hsa-miR-513c-3p	HTR2C	3358	ENSG00000147246	88.1877169698451	predicted	hsa-miR-513c-3p_HTR2C
1488	mirdb	MIMAT0019784	hsa-miR-4693-5p	HTR2C	3358	ENSG00000147246	88.1872417673262	predicted	hsa-miR-4693-5p_HTR2C
1489	mirdb	MIMAT0015057	hsa-miR-3180-5p	IL1A	3552	ENSG00000115008	88.1566	predicted	hsa-miR-3180-5p_IL1A
1490	mirdb	MIMAT0005942	hsa-miR-1288-3p	HTR2C	3358	ENSG00000147246	87.9297	predicted	hsa-miR-1288-3p_HTR2C
1491	mirdb	MIMAT0019971	hsa-miR-4796-3p	DUSP2	1844	ENSG00000158050	87.8902	predicted	hsa-miR-4796-3p_DUSP2
1492	mirdb	MIMAT0000429	hsa-miR-137-3p	HTR2C	3358	ENSG00000147246	87.8867	predicted	hsa-miR-137-3p_HTR2C
1493	mirdb	MIMAT0000242	hsa-miR-129-5p	ICAM4	3386	ENSG00000105371	87.8751	predicted	hsa-miR-129-5p_ICAM4
1494	mirdb	MIMAT0022484	hsa-miR-5692a	IL1A	3552	ENSG00000115008	87.7682	predicted	hsa-miR-5692a_IL1A
1495	mirdb	MIMAT0017981	hsa-miR-3605-5p	CX3CL1	6376	ENSG00000006210	87.7507	predicted	hsa-miR-3605-5p_CX3CL1
1496	mirdb	MIMAT0018443	hsa-miR-374c-5p	HTR2C	3358	ENSG00000147246	87.7434	predicted	hsa-miR-374c-5p_HTR2C
1497	mirdb	MIMAT0003331	hsa-miR-655-3p	HTR2C	3358	ENSG00000147246	87.7434	predicted	hsa-miR-655-3p_HTR2C
1498	mirdb	MIMAT0004987	hsa-miR-944	POF1B	79983	ENSG00000124429	87.7338	predicted	hsa-miR-944_POF1B
1499	mirdb	MIMAT0002880	hsa-miR-508-3p	HTR2C	3358	ENSG00000147246	87.6607	predicted	hsa-miR-508-3p_HTR2C
1500	mirdb	MIMAT0004553	hsa-miR-7-1-3p	HTR2C	3358	ENSG00000147246	87.5222175431415	predicted	hsa-miR-7-1-3p_HTR2C
1501	mirdb	MIMAT0004554	hsa-miR-7-2-3p	HTR2C	3358	ENSG00000147246	87.5222175431415	predicted	hsa-miR-7-2-3p_HTR2C
1502	mirdb	MIMAT0004913	hsa-miR-891b	IL1A	3552	ENSG00000115008	87.5199	predicted	hsa-miR-891b_IL1A
1503	mirdb	MIMAT0019882	hsa-miR-4747-5p	SIX1	6495	ENSG00000126778	87.4657	predicted	hsa-miR-4747-5p_SIX1
1504	mirdb	MIMAT0021128	hsa-miR-5196-5p	SIX1	6495	ENSG00000126778	87.4657	predicted	hsa-miR-5196-5p_SIX1
1505	mirdb	MIMAT0005457	hsa-miR-518a-5p	HTR2C	3358	ENSG00000147246	87.4352	predicted	hsa-miR-518a-5p_HTR2C
1506	mirdb	MIMAT0002862	hsa-miR-527	HTR2C	3358	ENSG00000147246	87.4352	predicted	hsa-miR-527_HTR2C
1507	mirdb	MIMAT0018953	hsa-miR-4437	ICAM4	3386	ENSG00000105371	87.3931	predicted	hsa-miR-4437_ICAM4
1508	mirdb	MIMAT0041617	hsa-miR-10393-5p	HTR2C	3358	ENSG00000147246	87.3877	predicted	hsa-miR-10393-5p_HTR2C
1509	mirdb	MIMAT0023713	hsa-miR-6088	HTR2C	3358	ENSG00000147246	87.2961	predicted	hsa-miR-6088_HTR2C
1510	mirdb	MIMAT0021130	hsa-miR-5197-5p	IL1A	3552	ENSG00000115008	87.1555	predicted	hsa-miR-5197-5p_IL1A
1511	mirdb	MIMAT0022497	hsa-miR-5692b	POF1B	79983	ENSG00000124429	87.1261379653602	predicted	hsa-miR-5692b_POF1B
1512	mirdb	MIMAT0022476	hsa-miR-5692c	POF1B	79983	ENSG00000124429	87.1261379653602	predicted	hsa-miR-5692c_POF1B
1513	mirdb	MIMAT0000255	hsa-miR-34a-5p	HTR2C	3358	ENSG00000147246	87.0873	predicted	hsa-miR-34a-5p_HTR2C
1514	mirdb	MIMAT0001541	hsa-miR-449a	HTR2C	3358	ENSG00000147246	87.0873	predicted	hsa-miR-449a_HTR2C
1515	mirdb	MIMAT0005942	hsa-miR-1288-3p	HTR2C	3358	ENSG00000147246	87.0308	predicted	hsa-miR-1288-3p_HTR2C
1516	mirdb	MIMAT0023708	hsa-miR-6083	HTR2C	3358	ENSG00000147246	87.0243	predicted	hsa-miR-6083_HTR2C
1517	mirdb	MIMAT0018443	hsa-miR-374c-5p	HTR2C	3358	ENSG00000147246	86.945	predicted	hsa-miR-374c-5p_HTR2C
1518	mirdb	MIMAT0003331	hsa-miR-655-3p	HTR2C	3358	ENSG00000147246	86.945	predicted	hsa-miR-655-3p_HTR2C
1519	mirdb	MIMAT0004658	hsa-miR-155-3p	HTR2C	3358	ENSG00000147246	86.7849	predicted	hsa-miR-155-3p_HTR2C
1520	mirdb	MIMAT0000686	hsa-miR-34c-5p	HTR2C	3358	ENSG00000147246	86.7322	predicted	hsa-miR-34c-5p_HTR2C
1521	mirdb	MIMAT0003327	hsa-miR-449b-5p	HTR2C	3358	ENSG00000147246	86.7322	predicted	hsa-miR-449b-5p_HTR2C
1522	mirdb	MIMAT0019027	hsa-miR-4492	CX3CL1	6376	ENSG00000006210	86.5060632827365	predicted	hsa-miR-4492_CX3CL1
1523	mirdb	MIMAT0023708	hsa-miR-6083	POF1B	79983	ENSG00000124429	86.1811	predicted	hsa-miR-6083_POF1B
1524	mirdb	MIMAT0019033	hsa-miR-4498	CX3CL1	6376	ENSG00000006210	86.1638291211121	predicted	hsa-miR-4498_CX3CL1
1525	mirdb	MIMAT0019820	hsa-miR-4713-5p	POF1B	79983	ENSG00000124429	86.073	predicted	hsa-miR-4713-5p_POF1B
1526	mirdb	MIMAT0004553	hsa-miR-7-1-3p	HTR2C	3358	ENSG00000147246	86.0339915240132	predicted	hsa-miR-7-1-3p_HTR2C
1527	mirdb	MIMAT0004554	hsa-miR-7-2-3p	HTR2C	3358	ENSG00000147246	86.0339915240132	predicted	hsa-miR-7-2-3p_HTR2C
1528	mirdb	MIMAT0016850	hsa-miR-4301	SIX1	6495	ENSG00000126778	85.8687	predicted	hsa-miR-4301_SIX1
1529	mirdb	MIMAT0019784	hsa-miR-4693-5p	HTR2C	3358	ENSG00000147246	85.8669481683066	predicted	hsa-miR-4693-5p_HTR2C
1530	mirdb	MIMAT0019770	hsa-miR-4684-3p	HTR2C	3358	ENSG00000147246	85.8473285961816	predicted	hsa-miR-4684-3p_HTR2C
1531	mirdb	MIMAT0022259	hsa-miR-5100	HTR2C	3358	ENSG00000147246	85.8364	predicted	hsa-miR-5100_HTR2C
1532	mirdb	MIMAT0019851	hsa-miR-4729	HTR2C	3358	ENSG00000147246	85.7988	predicted	hsa-miR-4729_HTR2C
1533	mirdb	MIMAT0018097	hsa-miR-3674	HTR2C	3358	ENSG00000147246	85.7954	predicted	hsa-miR-3674_HTR2C
1534	mirdb	MIMAT0005944	hsa-miR-1252-5p	HTR2C	3358	ENSG00000147246	85.7113044202382	predicted	hsa-miR-1252-5p_HTR2C
1535	mirdb	MIMAT0022965	hsa-miR-3606-3p	HTR2C	3358	ENSG00000147246	85.5493028410837	predicted	hsa-miR-3606-3p_HTR2C
1536	mirdb	MIMAT0018097	hsa-miR-3674	HTR2C	3358	ENSG00000147246	85.3522	predicted	hsa-miR-3674_HTR2C
1537	mirdb	MIMAT0000755	hsa-miR-323a-3p	HTR2C	3358	ENSG00000147246	85.244	predicted	hsa-miR-323a-3p_HTR2C
1538	mirdb	MIMAT0019851	hsa-miR-4729	HTR2C	3358	ENSG00000147246	85.244	predicted	hsa-miR-4729_HTR2C
1539	mirdb	MIMAT0003264	hsa-miR-596	HTR2C	3358	ENSG00000147246	85.1806	predicted	hsa-miR-596_HTR2C
1540	mirdb	MIMAT0005949	hsa-miR-664a-3p	IL1A	3552	ENSG00000115008	85.0961	predicted	hsa-miR-664a-3p_IL1A
1541	mirdb	MIMAT0018936	hsa-miR-4423-3p	SIX1	6495	ENSG00000126778	85.0336	predicted	hsa-miR-4423-3p_SIX1
1542	mirdb	MIMAT0016895	hsa-miR-2355-5p	ICAM4	3386	ENSG00000105371	84.9869	predicted	hsa-miR-2355-5p_ICAM4
1543	mirdb	MIMAT0027643	hsa-miR-6871-3p	CX3CL1	6376	ENSG00000006210	84.9344121668643	predicted	hsa-miR-6871-3p_CX3CL1
1544	mirdb	MIMAT0019765	hsa-miR-4680-3p	HTR2C	3358	ENSG00000147246	84.9330971237953	predicted	hsa-miR-4680-3p_HTR2C
1545	mirdb	MIMAT0018935	hsa-miR-4422	POF1B	79983	ENSG00000124429	84.726	predicted	hsa-miR-4422_POF1B
1546	mirdb	MIMAT0027417	hsa-miR-6758-3p	HTR2C	3358	ENSG00000147246	84.6381200979691	predicted	hsa-miR-6758-3p_HTR2C
1547	mirdb	MIMAT0018083	hsa-miR-3662	HTR2C	3358	ENSG00000147246	84.632636109732	predicted	hsa-miR-3662_HTR2C
1548	mirdb	MIMAT0022274	hsa-miR-5580-3p	HTR2C	3358	ENSG00000147246	84.5358	predicted	hsa-miR-5580-3p_HTR2C
1549	mirdb	MIMAT0026624	hsa-miR-651-3p	HTR2C	3358	ENSG00000147246	84.5289	predicted	hsa-miR-651-3p_HTR2C
1550	mirdb	MIMAT0022928	hsa-miR-376a-2-5p	HTR2C	3358	ENSG00000147246	84.3595	predicted	hsa-miR-376a-2-5p_HTR2C
1551	mirdb	MIMAT0017986	hsa-miR-3609	DUSP2	1844	ENSG00000158050	84.1479	predicted	hsa-miR-3609_DUSP2
1552	mirdb	MIMAT0018972	hsa-miR-548ah-5p	DUSP2	1844	ENSG00000158050	84.1479	predicted	hsa-miR-548ah-5p_DUSP2
1553	mirdb	MIMAT0000091	hsa-miR-33a-5p	POF1B	79983	ENSG00000124429	84.1008	predicted	hsa-miR-33a-5p_POF1B
1554	mirdb	MIMAT0003301	hsa-miR-33b-5p	POF1B	79983	ENSG00000124429	84.1008	predicted	hsa-miR-33b-5p_POF1B
1555	mirdb	MIMAT0002816	hsa-miR-494-3p	POF1B	79983	ENSG00000124429	84.0811	predicted	hsa-miR-494-3p_POF1B
1556	mirdb	MIMAT0019198	hsa-miR-3120-5p	CX3CL1	6376	ENSG00000006210	84.0575	predicted	hsa-miR-3120-5p_CX3CL1
1557	mirdb	MIMAT0019212	hsa-miR-3160-5p	SIX1	6495	ENSG00000126778	84.0499	predicted	hsa-miR-3160-5p_SIX1
1558	mirdb	MIMAT0019210	hsa-miR-3157-3p	HTR2C	3358	ENSG00000147246	83.9465	predicted	hsa-miR-3157-3p_HTR2C
1559	mirdb	MIMAT0019805	hsa-miR-4705	IL1A	3552	ENSG00000115008	83.865	predicted	hsa-miR-4705_IL1A
1560	mirdb	MIMAT0015057	hsa-miR-3180-5p	HTR2C	3358	ENSG00000147246	83.8316	predicted	hsa-miR-3180-5p_HTR2C
1561	mirdb	MIMAT0022484	hsa-miR-5692a	HTR2C	3358	ENSG00000147246	83.8067	predicted	hsa-miR-5692a_HTR2C
1562	mirdb	MIMAT0003223	hsa-miR-559	HTR2C	3358	ENSG00000147246	83.8019	predicted	hsa-miR-559_HTR2C
1563	mirdb	MIMAT0000435	hsa-miR-143-3p	HTR2C	3358	ENSG00000147246	83.6925	predicted	hsa-miR-143-3p_HTR2C
1564	mirdb	MIMAT0019924	hsa-miR-4770	HTR2C	3358	ENSG00000147246	83.6925	predicted	hsa-miR-4770_HTR2C
1565	mirdb	MIMAT0003257	hsa-miR-550a-3p	HTR2C	3358	ENSG00000147246	83.6784	predicted	hsa-miR-550a-3p_HTR2C
1566	mirdb	MIMAT0022489	hsa-miR-5696	IL1A	3552	ENSG00000115008	83.5783	predicted	hsa-miR-5696_IL1A
1567	mirdb	MIMAT0022479	hsa-miR-5688	HTR2C	3358	ENSG00000147246	83.5776532526565	predicted	hsa-miR-5688_HTR2C
1568	mirdb	MIMAT0022717	hsa-miR-873-3p	HTR2C	3358	ENSG00000147246	83.5268	predicted	hsa-miR-873-3p_HTR2C
1569	mirdb	MIMAT0000318	hsa-miR-200b-3p	SIX1	6495	ENSG00000126778	83.5166	predicted	hsa-miR-200b-3p_SIX1
1570	mirdb	MIMAT0001536	hsa-miR-429	SIX1	6495	ENSG00000126778	83.5166	predicted	hsa-miR-429_SIX1
1571	mirdb	MIMAT0000617	hsa-miR-200c-3p	SIX1	6495	ENSG00000126778	83.5166	predicted	hsa-miR-200c-3p_SIX1
1572	mirdb	MIMAT0022484	hsa-miR-5692a	HTR2C	3358	ENSG00000147246	83.2582	predicted	hsa-miR-5692a_HTR2C
1573	mirdb	MIMAT0003257	hsa-miR-550a-3p	HTR2C	3358	ENSG00000147246	83.1225	predicted	hsa-miR-550a-3p_HTR2C
1574	mirdb	MIMAT0019746	hsa-miR-4668-3p	HTR2C	3358	ENSG00000147246	83.0894	predicted	hsa-miR-4668-3p_HTR2C
1575	mirdb	MIMAT0005956	hsa-miR-1324	HTR2C	3358	ENSG00000147246	83.0732	predicted	hsa-miR-1324_HTR2C
1576	mirdb	MIMAT0020958	hsa-miR-4482-3p	SIX1	6495	ENSG00000126778	83.0369353808829	predicted	hsa-miR-4482-3p_SIX1
1577	mirdb	MIMAT0002817	hsa-miR-495-3p	HTR2C	3358	ENSG00000147246	82.9888	predicted	hsa-miR-495-3p_HTR2C
1578	mirdb	MIMAT0018953	hsa-miR-4437	ICAM4	3386	ENSG00000105371	82.9497	predicted	hsa-miR-4437_ICAM4
1579	mirdb	MIMAT0022280	hsa-miR-5582-3p	HTR2C	3358	ENSG00000147246	82.6328	predicted	hsa-miR-5582-3p_HTR2C
1580	mirdb	MIMAT0030020	hsa-miR-7705	POF1B	79983	ENSG00000124429	82.6179	predicted	hsa-miR-7705_POF1B
1581	mirdb	MIMAT0022928	hsa-miR-376a-2-5p	HTR2C	3358	ENSG00000147246	82.5987	predicted	hsa-miR-376a-2-5p_HTR2C
1582	mirdb	MIMAT0003235	hsa-miR-570-3p	HTR2C	3358	ENSG00000147246	82.3535539594603	predicted	hsa-miR-570-3p_HTR2C
1583	mirdb	MIMAT0019746	hsa-miR-4668-3p	HTR2C	3358	ENSG00000147246	82.2654	predicted	hsa-miR-4668-3p_HTR2C
1584	mirdb	MIMAT0021035	hsa-miR-5007-5p	IL1A	3552	ENSG00000115008	82.2301	predicted	hsa-miR-5007-5p_IL1A
1585	mirdb	MIMAT0027628	hsa-miR-6864-5p	HTR2C	3358	ENSG00000147246	82.2012	predicted	hsa-miR-6864-5p_HTR2C
1586	mirdb	MIMAT0023713	hsa-miR-6088	HTR2C	3358	ENSG00000147246	82.1906	predicted	hsa-miR-6088_HTR2C
1587	mirdb	MIMAT0019713	hsa-miR-4650-5p	POF1B	79983	ENSG00000124429	82.1557	predicted	hsa-miR-4650-5p_POF1B
1588	mirdb	MIMAT0019030	hsa-miR-4495	SIX1	6495	ENSG00000126778	82.0988	predicted	hsa-miR-4495_SIX1
1589	mirdb	MIMAT0041991	hsa-miR-10522-5p	IL1A	3552	ENSG00000115008	81.9677	predicted	hsa-miR-10522-5p_IL1A
1590	mirdb	MIMAT0003235	hsa-miR-570-3p	HTR2C	3358	ENSG00000147246	81.8984	predicted	hsa-miR-570-3p_HTR2C
1591	mirdb	MIMAT0022280	hsa-miR-5582-3p	HTR2C	3358	ENSG00000147246	81.8597	predicted	hsa-miR-5582-3p_HTR2C
1592	mirdb	MIMAT0002814	hsa-miR-432-5p	CX3CL1	6376	ENSG00000006210	81.8299	predicted	hsa-miR-432-5p_CX3CL1
1593	mirdb	MIMAT0004978	hsa-miR-935	POF1B	79983	ENSG00000124429	81.8161722042256	predicted	hsa-miR-935_POF1B
1594	mirdb	MIMAT0005889	hsa-miR-548l	HTR2C	3358	ENSG00000147246	81.773	predicted	hsa-miR-548l_HTR2C
1595	mirdb	MIMAT0004803	hsa-miR-548a-5p	HTR2C	3358	ENSG00000147246	81.773	predicted	hsa-miR-548a-5p_HTR2C
1596	mirdb	MIMAT0018928	hsa-miR-548ab	HTR2C	3358	ENSG00000147246	81.773	predicted	hsa-miR-548ab_HTR2C
1597	mirdb	MIMAT0019013	hsa-miR-548ak	HTR2C	3358	ENSG00000147246	81.773	predicted	hsa-miR-548ak_HTR2C
1598	mirdb	MIMAT0022740	hsa-miR-548am-5p	HTR2C	3358	ENSG00000147246	81.773	predicted	hsa-miR-548am-5p_HTR2C
1599	mirdb	MIMAT0021037	hsa-miR-548ap-5p	HTR2C	3358	ENSG00000147246	81.773	predicted	hsa-miR-548ap-5p_HTR2C
1600	mirdb	MIMAT0022263	hsa-miR-548aq-5p	HTR2C	3358	ENSG00000147246	81.773	predicted	hsa-miR-548aq-5p_HTR2C
1601	mirdb	MIMAT0022265	hsa-miR-548ar-5p	HTR2C	3358	ENSG00000147246	81.773	predicted	hsa-miR-548ar-5p_HTR2C
1602	mirdb	MIMAT0022267	hsa-miR-548as-5p	HTR2C	3358	ENSG00000147246	81.773	predicted	hsa-miR-548as-5p_HTR2C
1603	mirdb	MIMAT0022291	hsa-miR-548au-5p	HTR2C	3358	ENSG00000147246	81.773	predicted	hsa-miR-548au-5p_HTR2C
1604	mirdb	MIMAT0004798	hsa-miR-548b-5p	HTR2C	3358	ENSG00000147246	81.773	predicted	hsa-miR-548b-5p_HTR2C
1605	mirdb	MIMAT0004806	hsa-miR-548c-5p	HTR2C	3358	ENSG00000147246	81.773	predicted	hsa-miR-548c-5p_HTR2C
1606	mirdb	MIMAT0004812	hsa-miR-548d-5p	HTR2C	3358	ENSG00000147246	81.773	predicted	hsa-miR-548d-5p_HTR2C
1607	mirdb	MIMAT0005928	hsa-miR-548h-5p	HTR2C	3358	ENSG00000147246	81.773	predicted	hsa-miR-548h-5p_HTR2C
1608	mirdb	MIMAT0005935	hsa-miR-548i	HTR2C	3358	ENSG00000147246	81.773	predicted	hsa-miR-548i_HTR2C
1609	mirdb	MIMAT0022738	hsa-miR-548o-5p	HTR2C	3358	ENSG00000147246	81.773	predicted	hsa-miR-548o-5p_HTR2C
1610	mirdb	MIMAT0015060	hsa-miR-548w	HTR2C	3358	ENSG00000147246	81.773	predicted	hsa-miR-548w_HTR2C
1611	mirdb	MIMAT0018354	hsa-miR-548y	HTR2C	3358	ENSG00000147246	81.773	predicted	hsa-miR-548y_HTR2C
1612	mirdb	MIMAT0032114	hsa-miR-548ad-5p	HTR2C	3358	ENSG00000147246	81.773	predicted	hsa-miR-548ad-5p_HTR2C
1613	mirdb	MIMAT0032115	hsa-miR-548ae-5p	HTR2C	3358	ENSG00000147246	81.773	predicted	hsa-miR-548ae-5p_HTR2C
1614	mirdb	MIMAT0025452	hsa-miR-548ay-5p	HTR2C	3358	ENSG00000147246	81.773	predicted	hsa-miR-548ay-5p_HTR2C
1615	mirdb	MIMAT0035703	hsa-miR-548bb-5p	HTR2C	3358	ENSG00000147246	81.773	predicted	hsa-miR-548bb-5p_HTR2C
1616	mirdb	MIMAT0005875	hsa-miR-548j-5p	HTR2C	3358	ENSG00000147246	81.773	predicted	hsa-miR-548j-5p_HTR2C
1617	mirdb	MIMAT0002171	hsa-miR-410-3p	DUSP2	1844	ENSG00000158050	81.6733	predicted	hsa-miR-410-3p_DUSP2
1618	mirdb	MIMAT0004777	hsa-miR-513a-3p	HTR2C	3358	ENSG00000147246	81.5440359355061	predicted	hsa-miR-513a-3p_HTR2C
1619	mirdb	MIMAT0022728	hsa-miR-513c-3p	HTR2C	3358	ENSG00000147246	81.5440359355061	predicted	hsa-miR-513c-3p_HTR2C
1620	mirdb	MIMAT0027628	hsa-miR-6864-5p	HTR2C	3358	ENSG00000147246	81.5202	predicted	hsa-miR-6864-5p_HTR2C
1621	mirdb	MIMAT0027512	hsa-miR-6806-5p	HTR2C	3358	ENSG00000147246	81.2688	predicted	hsa-miR-6806-5p_HTR2C
1622	mirdb	MIMAT0037307	hsa-miR-196a-1-3p	IL1A	3552	ENSG00000115008	81.2412	predicted	hsa-miR-196a-1-3p_IL1A
1623	mirdb	MIMAT0019083	hsa-miR-4540	HTR2C	3358	ENSG00000147246	80.9728	predicted	hsa-miR-4540_HTR2C
1624	mirdb	MIMAT0019940	hsa-miR-4436b-5p	HTR2C	3358	ENSG00000147246	80.9488	predicted	hsa-miR-4436b-5p_HTR2C
1625	mirdb	MIMAT0019931	hsa-miR-4775	SIX1	6495	ENSG00000126778	80.6290885705088	predicted	hsa-miR-4775_SIX1
1626	mirdb	MIMAT0031179	hsa-miR-7976	HTR2C	3358	ENSG00000147246	80.6218	predicted	hsa-miR-7976_HTR2C
1627	mirdb	MIMAT0025474	hsa-miR-6509-5p	SIX1	6495	ENSG00000126778	80.4495	predicted	hsa-miR-6509-5p_SIX1
1628	mirdb	MIMAT0026640	hsa-miR-670-3p	SIX1	6495	ENSG00000126778	80.3871	predicted	hsa-miR-670-3p_SIX1
1629	mirdb	MIMAT0019727	hsa-miR-4659a-3p	HTR2C	3358	ENSG00000147246	80.2900307815569	predicted	hsa-miR-4659a-3p_HTR2C
1630	mirdb	MIMAT0019734	hsa-miR-4659b-3p	HTR2C	3358	ENSG00000147246	80.2900307815569	predicted	hsa-miR-4659b-3p_HTR2C

## Sheet: 02.diana_microt
	database	mature_mirna_acc	mature_mirna_id	target_symbol	target_entrez	target_ensembl	score	type	miRNA
1	diana_microt	MIMAT0000075	hsa-miR-20a-5p	DUSP2	1844	ENSG00000158050	1	predicted	hsa-miR-20a-5p_DUSP2
2	diana_microt	MIMAT0000680	hsa-miR-106b-5p	DUSP2	1844	ENSG00000158050	1	predicted	hsa-miR-106b-5p_DUSP2
3	diana_microt	MIMAT0000716	hsa-miR-302c-5p	HTR2C	3358	ENSG00000147246	1	predicted	hsa-miR-302c-5p_HTR2C
4	diana_microt	MIMAT0002881	hsa-miR-509-3p	IL1A	3552	ENSG00000115008	0.999	predicted	hsa-miR-509-3p_IL1A
5	diana_microt	MIMAT0002881	hsa-miR-509-3p	IL1A	3552	ENSG00000115008	0.999	predicted	hsa-miR-509-3p_IL1A
6	diana_microt	MIMAT0018083	hsa-miR-3662	IL1A	3552	ENSG00000115008	0.997	predicted	hsa-miR-3662_IL1A
7	diana_microt	MIMAT0018083	hsa-miR-3662	IL1A	3552	ENSG00000115008	0.997	predicted	hsa-miR-3662_IL1A
8	diana_microt	MIMAT0005788	hsa-miR-513b-5p	CX3CL1	6376	ENSG00000006210	0.994	predicted	hsa-miR-513b-5p_CX3CL1
9	diana_microt	MIMAT0005788	hsa-miR-513b-5p	CX3CL1	6376	ENSG00000006210	0.994	predicted	hsa-miR-513b-5p_CX3CL1
10	diana_microt	MIMAT0010313	hsa-miR-762	CX3CL1	6376	ENSG00000006210	0.993	predicted	hsa-miR-762_CX3CL1
11	diana_microt	MIMAT0010313	hsa-miR-762	CX3CL1	6376	ENSG00000006210	0.993	predicted	hsa-miR-762_CX3CL1
12	diana_microt	MIMAT0000103	hsa-miR-106a-5p	DUSP2	1844	ENSG00000158050	0.992	predicted	hsa-miR-106a-5p_DUSP2
13	diana_microt	MIMAT0002836	hsa-miR-526b-3p	DUSP2	1844	ENSG00000158050	0.991	predicted	hsa-miR-526b-3p_DUSP2
14	diana_microt	MIMAT0022479	hsa-miR-5688	HTR2C	3358	ENSG00000147246	0.99	predicted	hsa-miR-5688_HTR2C
15	diana_microt	MIMAT0004703	hsa-miR-335-3p	SIX1	6495	ENSG00000126778	0.99	predicted	hsa-miR-335-3p_SIX1
16	diana_microt	MIMAT0004703	hsa-miR-335-3p	SIX1	6495	ENSG00000126778	0.99	predicted	hsa-miR-335-3p_SIX1
17	diana_microt	MIMAT0019027	hsa-miR-4492	CX3CL1	6376	ENSG00000006210	0.989	predicted	hsa-miR-4492_CX3CL1
18	diana_microt	MIMAT0019027	hsa-miR-4492	CX3CL1	6376	ENSG00000006210	0.989	predicted	hsa-miR-4492_CX3CL1
19	diana_microt	MIMAT0004812	hsa-miR-548d-5p	SIX1	6495	ENSG00000126778	0.988	predicted	hsa-miR-548d-5p_SIX1
20	diana_microt	MIMAT0004812	hsa-miR-548d-5p	SIX1	6495	ENSG00000126778	0.988	predicted	hsa-miR-548d-5p_SIX1
21	diana_microt	MIMAT0000724	hsa-miR-372-3p	DUSP2	1844	ENSG00000158050	0.986	predicted	hsa-miR-372-3p_DUSP2
22	diana_microt	MIMAT0013771	hsa-miR-449c-3p	HTR2C	3358	ENSG00000147246	0.986	predicted	hsa-miR-449c-3p_HTR2C
23	diana_microt	MIMAT0002816	hsa-miR-494-3p	POF1B	79983	ENSG00000124429	0.986	predicted	hsa-miR-494-3p_POF1B
24	diana_microt	MIMAT0002816	hsa-miR-494-3p	POF1B	79983	ENSG00000124429	0.986	predicted	hsa-miR-494-3p_POF1B
25	diana_microt	MIMAT0002817	hsa-miR-495-3p	HTR2C	3358	ENSG00000147246	0.985	predicted	hsa-miR-495-3p_HTR2C
26	diana_microt	MIMAT0004806	hsa-miR-548c-5p	SIX1	6495	ENSG00000126778	0.985	predicted	hsa-miR-548c-5p_SIX1
27	diana_microt	MIMAT0022738	hsa-miR-548o-5p	SIX1	6495	ENSG00000126778	0.985	predicted	hsa-miR-548o-5p_SIX1
28	diana_microt	MIMAT0022740	hsa-miR-548am-5p	SIX1	6495	ENSG00000126778	0.985	predicted	hsa-miR-548am-5p_SIX1
29	diana_microt	MIMAT0004806	hsa-miR-548c-5p	SIX1	6495	ENSG00000126778	0.985	predicted	hsa-miR-548c-5p_SIX1
30	diana_microt	MIMAT0022738	hsa-miR-548o-5p	SIX1	6495	ENSG00000126778	0.985	predicted	hsa-miR-548o-5p_SIX1
31	diana_microt	MIMAT0022740	hsa-miR-548am-5p	SIX1	6495	ENSG00000126778	0.985	predicted	hsa-miR-548am-5p_SIX1
32	diana_microt	MIMAT0019003	hsa-miR-4476	HTR2C	3358	ENSG00000147246	0.984	predicted	hsa-miR-4476_HTR2C
33	diana_microt	MIMAT0019793	hsa-miR-4698	HTR2C	3358	ENSG00000147246	0.984	predicted	hsa-miR-4698_HTR2C
34	diana_microt	MIMAT0020958	hsa-miR-4482-3p	SIX1	6495	ENSG00000126778	0.984	predicted	hsa-miR-4482-3p_SIX1
35	diana_microt	MIMAT0020958	hsa-miR-4482-3p	SIX1	6495	ENSG00000126778	0.984	predicted	hsa-miR-4482-3p_SIX1
36	diana_microt	MIMAT0022291	hsa-miR-548au-5p	SIX1	6495	ENSG00000126778	0.983	predicted	hsa-miR-548au-5p_SIX1
37	diana_microt	MIMAT0022291	hsa-miR-548au-5p	SIX1	6495	ENSG00000126778	0.983	predicted	hsa-miR-548au-5p_SIX1
38	diana_microt	MIMAT0022484	hsa-miR-5692a	HTR2C	3358	ENSG00000147246	0.982	predicted	hsa-miR-5692a_HTR2C
39	diana_microt	MIMAT0002834	hsa-miR-520a-3p	DUSP2	1844	ENSG00000158050	0.981	predicted	hsa-miR-520a-3p_DUSP2
40	diana_microt	MIMAT0022728	hsa-miR-513c-3p	HTR2C	3358	ENSG00000147246	0.981	predicted	hsa-miR-513c-3p_HTR2C
41	diana_microt	MIMAT0019832	hsa-miR-4719	HTR2C	3358	ENSG00000147246	0.98	predicted	hsa-miR-4719_HTR2C
42	diana_microt	MIMAT0004777	hsa-miR-513a-3p	HTR2C	3358	ENSG00000147246	0.98	predicted	hsa-miR-513a-3p_HTR2C
43	diana_microt	MIMAT0022265	hsa-miR-548ar-5p	SIX1	6495	ENSG00000126778	0.98	predicted	hsa-miR-548ar-5p_SIX1
44	diana_microt	MIMAT0022265	hsa-miR-548ar-5p	SIX1	6495	ENSG00000126778	0.98	predicted	hsa-miR-548ar-5p_SIX1
45	diana_microt	MIMAT0015021	hsa-miR-3148	POF1B	79983	ENSG00000124429	0.98	predicted	hsa-miR-3148_POF1B
46	diana_microt	MIMAT0015021	hsa-miR-3148	POF1B	79983	ENSG00000124429	0.98	predicted	hsa-miR-3148_POF1B
47	diana_microt	MIMAT0003389	hsa-miR-542-3p	SIX1	6495	ENSG00000126778	0.979	predicted	hsa-miR-542-3p_SIX1
48	diana_microt	MIMAT0022263	hsa-miR-548aq-5p	SIX1	6495	ENSG00000126778	0.979	predicted	hsa-miR-548aq-5p_SIX1
49	diana_microt	MIMAT0003389	hsa-miR-542-3p	SIX1	6495	ENSG00000126778	0.979	predicted	hsa-miR-542-3p_SIX1
50	diana_microt	MIMAT0022263	hsa-miR-548aq-5p	SIX1	6495	ENSG00000126778	0.979	predicted	hsa-miR-548aq-5p_SIX1
51	diana_microt	MIMAT0000753	hsa-miR-342-3p	HTR2C	3358	ENSG00000147246	0.974	predicted	hsa-miR-342-3p_HTR2C
52	diana_microt	MIMAT0002825	hsa-miR-520e-3p	DUSP2	1844	ENSG00000158050	0.972	predicted	hsa-miR-520e-3p_DUSP2
53	diana_microt	MIMAT0004954	hsa-miR-543	IL1A	3552	ENSG00000115008	0.971	predicted	hsa-miR-543_IL1A
54	diana_microt	MIMAT0004954	hsa-miR-543	IL1A	3552	ENSG00000115008	0.971	predicted	hsa-miR-543_IL1A
55	diana_microt	MIMAT0004954	hsa-miR-543	HTR2C	3358	ENSG00000147246	0.97	predicted	hsa-miR-543_HTR2C
56	diana_microt	MIMAT0019770	hsa-miR-4684-3p	HTR2C	3358	ENSG00000147246	0.97	predicted	hsa-miR-4684-3p_HTR2C
57	diana_microt	MIMAT0021037	hsa-miR-548ap-5p	SIX1	6495	ENSG00000126778	0.969	predicted	hsa-miR-548ap-5p_SIX1
58	diana_microt	MIMAT0018194	hsa-miR-3150b-3p	SIX1	6495	ENSG00000126778	0.969	predicted	hsa-miR-3150b-3p_SIX1
59	diana_microt	MIMAT0021037	hsa-miR-548ap-5p	SIX1	6495	ENSG00000126778	0.969	predicted	hsa-miR-548ap-5p_SIX1
60	diana_microt	MIMAT0018194	hsa-miR-3150b-3p	SIX1	6495	ENSG00000126778	0.969	predicted	hsa-miR-3150b-3p_SIX1
61	diana_microt	MIMAT0005875	hsa-miR-548j-5p	SIX1	6495	ENSG00000126778	0.968	predicted	hsa-miR-548j-5p_SIX1
62	diana_microt	MIMAT0005875	hsa-miR-548j-5p	SIX1	6495	ENSG00000126778	0.968	predicted	hsa-miR-548j-5p_SIX1
63	diana_microt	MIMAT0002856	hsa-miR-520d-3p	DUSP2	1844	ENSG00000158050	0.967	predicted	hsa-miR-520d-3p_DUSP2
64	diana_microt	MIMAT0003328	hsa-miR-653-5p	HTR2C	3358	ENSG00000147246	0.967	predicted	hsa-miR-653-5p_HTR2C
65	diana_microt	MIMAT0004798	hsa-miR-548b-5p	SIX1	6495	ENSG00000126778	0.967	predicted	hsa-miR-548b-5p_SIX1
66	diana_microt	MIMAT0019948	hsa-miR-4784	SIX1	6495	ENSG00000126778	0.967	predicted	hsa-miR-4784_SIX1
67	diana_microt	MIMAT0022484	hsa-miR-5692a	SIX1	6495	ENSG00000126778	0.967	predicted	hsa-miR-5692a_SIX1
68	diana_microt	MIMAT0004798	hsa-miR-548b-5p	SIX1	6495	ENSG00000126778	0.967	predicted	hsa-miR-548b-5p_SIX1
69	diana_microt	MIMAT0019948	hsa-miR-4784	SIX1	6495	ENSG00000126778	0.967	predicted	hsa-miR-4784_SIX1
70	diana_microt	MIMAT0022484	hsa-miR-5692a	SIX1	6495	ENSG00000126778	0.967	predicted	hsa-miR-5692a_SIX1
71	diana_microt	MIMAT0015012	hsa-miR-3143	HTR2C	3358	ENSG00000147246	0.966	predicted	hsa-miR-3143_HTR2C
72	diana_microt	MIMAT0018104	hsa-miR-3679-5p	HTR2C	3358	ENSG00000147246	0.966	predicted	hsa-miR-3679-5p_HTR2C
73	diana_microt	MIMAT0018928	hsa-miR-548ab	SIX1	6495	ENSG00000126778	0.966	predicted	hsa-miR-548ab_SIX1
74	diana_microt	MIMAT0018928	hsa-miR-548ab	SIX1	6495	ENSG00000126778	0.966	predicted	hsa-miR-548ab_SIX1
75	diana_microt	MIMAT0018982	hsa-miR-4460	POF1B	79983	ENSG00000124429	0.965	predicted	hsa-miR-4460_POF1B
76	diana_microt	MIMAT0018982	hsa-miR-4460	POF1B	79983	ENSG00000124429	0.965	predicted	hsa-miR-4460_POF1B
77	diana_microt	MIMAT0000686	hsa-miR-34c-5p	HTR2C	3358	ENSG00000147246	0.964	predicted	hsa-miR-34c-5p_HTR2C
78	diana_microt	MIMAT0003327	hsa-miR-449b-5p	HTR2C	3358	ENSG00000147246	0.963	predicted	hsa-miR-449b-5p_HTR2C
79	diana_microt	MIMAT0004703	hsa-miR-335-3p	HTR2C	3358	ENSG00000147246	0.963	predicted	hsa-miR-335-3p_HTR2C
80	diana_microt	MIMAT0022267	hsa-miR-548as-5p	SIX1	6495	ENSG00000126778	0.962	predicted	hsa-miR-548as-5p_SIX1
81	diana_microt	MIMAT0022287	hsa-miR-5586-5p	SIX1	6495	ENSG00000126778	0.962	predicted	hsa-miR-5586-5p_SIX1
82	diana_microt	MIMAT0022267	hsa-miR-548as-5p	SIX1	6495	ENSG00000126778	0.962	predicted	hsa-miR-548as-5p_SIX1
83	diana_microt	MIMAT0022287	hsa-miR-5586-5p	SIX1	6495	ENSG00000126778	0.962	predicted	hsa-miR-5586-5p_SIX1
84	diana_microt	MIMAT0018083	hsa-miR-3662	HTR2C	3358	ENSG00000147246	0.961	predicted	hsa-miR-3662_HTR2C
85	diana_microt	MIMAT0004766	hsa-miR-146b-3p	IL1A	3552	ENSG00000115008	0.961	predicted	hsa-miR-146b-3p_IL1A
86	diana_microt	MIMAT0004766	hsa-miR-146b-3p	IL1A	3552	ENSG00000115008	0.961	predicted	hsa-miR-146b-3p_IL1A
87	diana_microt	MIMAT0004593	hsa-miR-130a-5p	SIX1	6495	ENSG00000126778	0.961	predicted	hsa-miR-130a-5p_SIX1
88	diana_microt	MIMAT0004593	hsa-miR-130a-5p	SIX1	6495	ENSG00000126778	0.961	predicted	hsa-miR-130a-5p_SIX1
89	diana_microt	MIMAT0004611	hsa-miR-185-3p	CX3CL1	6376	ENSG00000006210	0.961	predicted	hsa-miR-185-3p_CX3CL1
90	diana_microt	MIMAT0004611	hsa-miR-185-3p	CX3CL1	6376	ENSG00000006210	0.961	predicted	hsa-miR-185-3p_CX3CL1
91	diana_microt	MIMAT0003285	hsa-miR-548c-3p	SIX1	6495	ENSG00000126778	0.96	predicted	hsa-miR-548c-3p_SIX1
92	diana_microt	MIMAT0003285	hsa-miR-548c-3p	SIX1	6495	ENSG00000126778	0.96	predicted	hsa-miR-548c-3p_SIX1
93	diana_microt	MIMAT0021018	hsa-miR-4999-3p	POF1B	79983	ENSG00000124429	0.959	predicted	hsa-miR-4999-3p_POF1B
94	diana_microt	MIMAT0021018	hsa-miR-4999-3p	POF1B	79983	ENSG00000124429	0.959	predicted	hsa-miR-4999-3p_POF1B
95	diana_microt	MIMAT0002843	hsa-miR-520b-3p	DUSP2	1844	ENSG00000158050	0.958	predicted	hsa-miR-520b-3p_DUSP2
96	diana_microt	MIMAT0002846	hsa-miR-520c-3p	DUSP2	1844	ENSG00000158050	0.958	predicted	hsa-miR-520c-3p_DUSP2
97	diana_microt	MIMAT0019805	hsa-miR-4705	IL1A	3552	ENSG00000115008	0.958	predicted	hsa-miR-4705_IL1A
98	diana_microt	MIMAT0019805	hsa-miR-4705	IL1A	3552	ENSG00000115008	0.958	predicted	hsa-miR-4705_IL1A
99	diana_microt	MIMAT0004803	hsa-miR-548a-5p	SIX1	6495	ENSG00000126778	0.958	predicted	hsa-miR-548a-5p_SIX1
100	diana_microt	MIMAT0004803	hsa-miR-548a-5p	SIX1	6495	ENSG00000126778	0.958	predicted	hsa-miR-548a-5p_SIX1
101	diana_microt	MIMAT0022476	hsa-miR-5692c	HTR2C	3358	ENSG00000147246	0.957	predicted	hsa-miR-5692c_HTR2C
102	diana_microt	MIMAT0022722	hsa-miR-548g-5p	SIX1	6495	ENSG00000126778	0.956	predicted	hsa-miR-548g-5p_SIX1
103	diana_microt	MIMAT0022733	hsa-miR-548x-5p	SIX1	6495	ENSG00000126778	0.956	predicted	hsa-miR-548x-5p_SIX1
104	diana_microt	MIMAT0022739	hsa-miR-548aj-5p	SIX1	6495	ENSG00000126778	0.956	predicted	hsa-miR-548aj-5p_SIX1
105	diana_microt	MIMAT0022722	hsa-miR-548g-5p	SIX1	6495	ENSG00000126778	0.956	predicted	hsa-miR-548g-5p_SIX1
106	diana_microt	MIMAT0022733	hsa-miR-548x-5p	SIX1	6495	ENSG00000126778	0.956	predicted	hsa-miR-548x-5p_SIX1
107	diana_microt	MIMAT0022739	hsa-miR-548aj-5p	SIX1	6495	ENSG00000126778	0.956	predicted	hsa-miR-548aj-5p_SIX1
108	diana_microt	MIMAT0005592	hsa-miR-1237-3p	POF1B	79983	ENSG00000124429	0.956	predicted	hsa-miR-1237-3p_POF1B
109	diana_microt	MIMAT0005592	hsa-miR-1237-3p	POF1B	79983	ENSG00000124429	0.956	predicted	hsa-miR-1237-3p_POF1B
110	diana_microt	MIMAT0005928	hsa-miR-548h-5p	SIX1	6495	ENSG00000126778	0.955	predicted	hsa-miR-548h-5p_SIX1
111	diana_microt	MIMAT0005928	hsa-miR-548h-5p	SIX1	6495	ENSG00000126778	0.955	predicted	hsa-miR-548h-5p_SIX1
112	diana_microt	MIMAT0001541	hsa-miR-449a	HTR2C	3358	ENSG00000147246	0.954	predicted	hsa-miR-449a_HTR2C
113	diana_microt	MIMAT0005935	hsa-miR-548i	SIX1	6495	ENSG00000126778	0.954	predicted	hsa-miR-548i_SIX1
114	diana_microt	MIMAT0005935	hsa-miR-548i	SIX1	6495	ENSG00000126778	0.954	predicted	hsa-miR-548i_SIX1
115	diana_microt	MIMAT0018443	hsa-miR-374c-5p	HTR2C	3358	ENSG00000147246	0.952	predicted	hsa-miR-374c-5p_HTR2C
116	diana_microt	MIMAT0002855	hsa-miR-520d-5p	SIX1	6495	ENSG00000126778	0.951	predicted	hsa-miR-520d-5p_SIX1
117	diana_microt	MIMAT0002855	hsa-miR-520d-5p	SIX1	6495	ENSG00000126778	0.951	predicted	hsa-miR-520d-5p_SIX1
118	diana_microt	MIMAT0018354	hsa-miR-548y	SIX1	6495	ENSG00000126778	0.949	predicted	hsa-miR-548y_SIX1
119	diana_microt	MIMAT0002849	hsa-miR-524-5p	SIX1	6495	ENSG00000126778	0.949	predicted	hsa-miR-524-5p_SIX1
120	diana_microt	MIMAT0018354	hsa-miR-548y	SIX1	6495	ENSG00000126778	0.949	predicted	hsa-miR-548y_SIX1
121	diana_microt	MIMAT0002849	hsa-miR-524-5p	SIX1	6495	ENSG00000126778	0.949	predicted	hsa-miR-524-5p_SIX1
122	diana_microt	MIMAT0022724	hsa-miR-1277-5p	IL1A	3552	ENSG00000115008	0.948	predicted	hsa-miR-1277-5p_IL1A
123	diana_microt	MIMAT0022724	hsa-miR-1277-5p	IL1A	3552	ENSG00000115008	0.948	predicted	hsa-miR-1277-5p_IL1A
124	diana_microt	MIMAT0004955	hsa-miR-374b-5p	HTR2C	3358	ENSG00000147246	0.946	predicted	hsa-miR-374b-5p_HTR2C
125	diana_microt	MIMAT0003331	hsa-miR-655-3p	HTR2C	3358	ENSG00000147246	0.943	predicted	hsa-miR-655-3p_HTR2C
126	diana_microt	MIMAT0000080	hsa-miR-24-3p	IL1A	3552	ENSG00000115008	0.943	predicted	hsa-miR-24-3p_IL1A
127	diana_microt	MIMAT0000080	hsa-miR-24-3p	IL1A	3552	ENSG00000115008	0.943	predicted	hsa-miR-24-3p_IL1A
128	diana_microt	MIMAT0019795	hsa-miR-4699-3p	HTR2C	3358	ENSG00000147246	0.942	predicted	hsa-miR-4699-3p_HTR2C
129	diana_microt	MIMAT0019746	hsa-miR-4668-3p	SIX1	6495	ENSG00000126778	0.942	predicted	hsa-miR-4668-3p_SIX1
130	diana_microt	MIMAT0019746	hsa-miR-4668-3p	SIX1	6495	ENSG00000126778	0.942	predicted	hsa-miR-4668-3p_SIX1
131	diana_microt	MIMAT0000255	hsa-miR-34a-5p	HTR2C	3358	ENSG00000147246	0.941	predicted	hsa-miR-34a-5p_HTR2C
132	diana_microt	MIMAT0019203	hsa-miR-3136-3p	SIX1	6495	ENSG00000126778	0.941	predicted	hsa-miR-3136-3p_SIX1
133	diana_microt	MIMAT0019203	hsa-miR-3136-3p	SIX1	6495	ENSG00000126778	0.941	predicted	hsa-miR-3136-3p_SIX1
134	diana_microt	MIMAT0003880	hsa-miR-671-5p	ICAM4	3386	ENSG00000105371	0.941	predicted	hsa-miR-671-5p_ICAM4
135	diana_microt	MIMAT0003880	hsa-miR-671-5p	ICAM4	3386	ENSG00000105371	0.941	predicted	hsa-miR-671-5p_ICAM4
136	diana_microt	MIMAT0022497	hsa-miR-5692b	HTR2C	3358	ENSG00000147246	0.94	predicted	hsa-miR-5692b_HTR2C
137	diana_microt	MIMAT0004785	hsa-miR-545-5p	HTR2C	3358	ENSG00000147246	0.94	predicted	hsa-miR-545-5p_HTR2C
138	diana_microt	MIMAT0021033	hsa-miR-5006-5p	SIX1	6495	ENSG00000126778	0.94	predicted	hsa-miR-5006-5p_SIX1
139	diana_microt	MIMAT0021033	hsa-miR-5006-5p	SIX1	6495	ENSG00000126778	0.94	predicted	hsa-miR-5006-5p_SIX1
140	diana_microt	MIMAT0002853	hsa-miR-519d-3p	DUSP2	1844	ENSG00000158050	0.939	predicted	hsa-miR-519d-3p_DUSP2
141	diana_microt	MIMAT0009977	hsa-miR-2052	SIX1	6495	ENSG00000126778	0.939	predicted	hsa-miR-2052_SIX1
142	diana_microt	MIMAT0009977	hsa-miR-2052	SIX1	6495	ENSG00000126778	0.939	predicted	hsa-miR-2052_SIX1
143	diana_microt	MIMAT0000429	hsa-miR-137-3p	HTR2C	3358	ENSG00000147246	0.937	predicted	hsa-miR-137-3p_HTR2C
144	diana_microt	MIMAT0019072	hsa-miR-4533	HTR2C	3358	ENSG00000147246	0.935	predicted	hsa-miR-4533_HTR2C
145	diana_microt	MIMAT0005871	hsa-miR-1207-5p	CX3CL1	6376	ENSG00000006210	0.935	predicted	hsa-miR-1207-5p_CX3CL1
146	diana_microt	MIMAT0005871	hsa-miR-1207-5p	CX3CL1	6376	ENSG00000006210	0.935	predicted	hsa-miR-1207-5p_CX3CL1
147	diana_microt	MIMAT0009977	hsa-miR-2052	POF1B	79983	ENSG00000124429	0.935	predicted	hsa-miR-2052_POF1B
148	diana_microt	MIMAT0009977	hsa-miR-2052	POF1B	79983	ENSG00000124429	0.935	predicted	hsa-miR-2052_POF1B
149	diana_microt	MIMAT0014997	hsa-miR-3132	IL1A	3552	ENSG00000115008	0.932	predicted	hsa-miR-3132_IL1A
150	diana_microt	MIMAT0014997	hsa-miR-3132	IL1A	3552	ENSG00000115008	0.932	predicted	hsa-miR-3132_IL1A
151	diana_microt	MIMAT0019882	hsa-miR-4747-5p	SIX1	6495	ENSG00000126778	0.932	predicted	hsa-miR-4747-5p_SIX1
152	diana_microt	MIMAT0019882	hsa-miR-4747-5p	SIX1	6495	ENSG00000126778	0.932	predicted	hsa-miR-4747-5p_SIX1
153	diana_microt	MIMAT0022269	hsa-miR-5579-5p	POF1B	79983	ENSG00000124429	0.932	predicted	hsa-miR-5579-5p_POF1B
154	diana_microt	MIMAT0022269	hsa-miR-5579-5p	POF1B	79983	ENSG00000124429	0.932	predicted	hsa-miR-5579-5p_POF1B
155	diana_microt	MIMAT0019830	hsa-miR-4717-3p	HTR2C	3358	ENSG00000147246	0.931	predicted	hsa-miR-4717-3p_HTR2C
156	diana_microt	MIMAT0021021	hsa-miR-5001-5p	CX3CL1	6376	ENSG00000006210	0.931	predicted	hsa-miR-5001-5p_CX3CL1
157	diana_microt	MIMAT0021021	hsa-miR-5001-5p	CX3CL1	6376	ENSG00000006210	0.931	predicted	hsa-miR-5001-5p_CX3CL1
158	diana_microt	MIMAT0022496	hsa-miR-5703	HTR2C	3358	ENSG00000147246	0.93	predicted	hsa-miR-5703_HTR2C
159	diana_microt	MIMAT0000721	hsa-miR-369-3p	HTR2C	3358	ENSG00000147246	0.929	predicted	hsa-miR-369-3p_HTR2C
160	diana_microt	MIMAT0004921	hsa-miR-889-3p	HTR2C	3358	ENSG00000147246	0.928	predicted	hsa-miR-889-3p_HTR2C
161	diana_microt	MIMAT0004609	hsa-miR-149-3p	DUSP2	1844	ENSG00000158050	0.926	predicted	hsa-miR-149-3p_DUSP2
162	diana_microt	MIMAT0016898	hsa-miR-4263	POF1B	79983	ENSG00000124429	0.925	predicted	hsa-miR-4263_POF1B
163	diana_microt	MIMAT0016898	hsa-miR-4263	POF1B	79983	ENSG00000124429	0.925	predicted	hsa-miR-4263_POF1B
164	diana_microt	MIMAT0011159	hsa-miR-2115-3p	HTR2C	3358	ENSG00000147246	0.923	predicted	hsa-miR-2115-3p_HTR2C
165	diana_microt	MIMAT0003249	hsa-miR-584-5p	POF1B	79983	ENSG00000124429	0.923	predicted	hsa-miR-584-5p_POF1B
166	diana_microt	MIMAT0003249	hsa-miR-584-5p	POF1B	79983	ENSG00000124429	0.923	predicted	hsa-miR-584-5p_POF1B
167	diana_microt	MIMAT0015012	hsa-miR-3143	IL1A	3552	ENSG00000115008	0.921	predicted	hsa-miR-3143_IL1A
168	diana_microt	MIMAT0015012	hsa-miR-3143	IL1A	3552	ENSG00000115008	0.921	predicted	hsa-miR-3143_IL1A
169	diana_microt	MIMAT0002813	hsa-miR-493-5p	POF1B	79983	ENSG00000124429	0.921	predicted	hsa-miR-493-5p_POF1B
170	diana_microt	MIMAT0002813	hsa-miR-493-5p	POF1B	79983	ENSG00000124429	0.921	predicted	hsa-miR-493-5p_POF1B
171	diana_microt	MIMAT0005956	hsa-miR-1324	HTR2C	3358	ENSG00000147246	0.918	predicted	hsa-miR-1324_HTR2C
172	diana_microt	MIMAT0019787	hsa-miR-4694-3p	HTR2C	3358	ENSG00000147246	0.918	predicted	hsa-miR-4694-3p_HTR2C
173	diana_microt	MIMAT0019041	hsa-miR-4505	CX3CL1	6376	ENSG00000006210	0.917	predicted	hsa-miR-4505_CX3CL1
174	diana_microt	MIMAT0019041	hsa-miR-4505	CX3CL1	6376	ENSG00000006210	0.917	predicted	hsa-miR-4505_CX3CL1
175	diana_microt	MIMAT0019931	hsa-miR-4775	SIX1	6495	ENSG00000126778	0.915	predicted	hsa-miR-4775_SIX1
176	diana_microt	MIMAT0015009	hsa-miR-548t-5p	SIX1	6495	ENSG00000126778	0.915	predicted	hsa-miR-548t-5p_SIX1
177	diana_microt	MIMAT0019931	hsa-miR-4775	SIX1	6495	ENSG00000126778	0.915	predicted	hsa-miR-4775_SIX1
178	diana_microt	MIMAT0015009	hsa-miR-548t-5p	SIX1	6495	ENSG00000126778	0.915	predicted	hsa-miR-548t-5p_SIX1
179	diana_microt	MIMAT0002171	hsa-miR-410-3p	HTR2C	3358	ENSG00000147246	0.914	predicted	hsa-miR-410-3p_HTR2C
180	diana_microt	MIMAT0019891	hsa-miR-4753-3p	POF1B	79983	ENSG00000124429	0.914	predicted	hsa-miR-4753-3p_POF1B
181	diana_microt	MIMAT0019891	hsa-miR-4753-3p	POF1B	79983	ENSG00000124429	0.914	predicted	hsa-miR-4753-3p_POF1B
182	diana_microt	MIMAT0019697	hsa-miR-4639-5p	DUSP2	1844	ENSG00000158050	0.913	predicted	hsa-miR-4639-5p_DUSP2
183	diana_microt	MIMAT0019033	hsa-miR-4498	CX3CL1	6376	ENSG00000006210	0.91	predicted	hsa-miR-4498_CX3CL1
184	diana_microt	MIMAT0019033	hsa-miR-4498	CX3CL1	6376	ENSG00000006210	0.91	predicted	hsa-miR-4498_CX3CL1
185	diana_microt	MIMAT0000684	hsa-miR-302a-3p	DUSP2	1844	ENSG00000158050	0.909	predicted	hsa-miR-302a-3p_DUSP2
186	diana_microt	MIMAT0004701	hsa-miR-338-5p	DUSP2	1844	ENSG00000158050	0.908	predicted	hsa-miR-338-5p_DUSP2
187	diana_microt	MIMAT0003223	hsa-miR-559	SIX1	6495	ENSG00000126778	0.906	predicted	hsa-miR-559_SIX1
188	diana_microt	MIMAT0003223	hsa-miR-559	SIX1	6495	ENSG00000126778	0.906	predicted	hsa-miR-559_SIX1
189	diana_microt	MIMAT0002171	hsa-miR-410-3p	DUSP2	1844	ENSG00000158050	0.904	predicted	hsa-miR-410-3p_DUSP2
190	diana_microt	MIMAT0004554	hsa-miR-7-2-3p	HTR2C	3358	ENSG00000147246	0.904	predicted	hsa-miR-7-2-3p_HTR2C
191	diana_microt	MIMAT0015008	hsa-miR-3140-3p	HTR2C	3358	ENSG00000147246	0.904	predicted	hsa-miR-3140-3p_HTR2C
192	diana_microt	MIMAT0019760	hsa-miR-4677-5p	IL1A	3552	ENSG00000115008	0.904	predicted	hsa-miR-4677-5p_IL1A
193	diana_microt	MIMAT0019760	hsa-miR-4677-5p	IL1A	3552	ENSG00000115008	0.904	predicted	hsa-miR-4677-5p_IL1A
194	diana_microt	MIMAT0015060	hsa-miR-548w	SIX1	6495	ENSG00000126778	0.9	predicted	hsa-miR-548w_SIX1
195	diana_microt	MIMAT0022471	hsa-miR-548aw	SIX1	6495	ENSG00000126778	0.9	predicted	hsa-miR-548aw_SIX1
196	diana_microt	MIMAT0015060	hsa-miR-548w	SIX1	6495	ENSG00000126778	0.9	predicted	hsa-miR-548w_SIX1
197	diana_microt	MIMAT0022471	hsa-miR-548aw	SIX1	6495	ENSG00000126778	0.9	predicted	hsa-miR-548aw_SIX1
198	diana_microt	MIMAT0019953	hsa-miR-2467-3p	POF1B	79983	ENSG00000124429	0.9	predicted	hsa-miR-2467-3p_POF1B
199	diana_microt	MIMAT0019953	hsa-miR-2467-3p	POF1B	79983	ENSG00000124429	0.9	predicted	hsa-miR-2467-3p_POF1B
200	diana_microt	MIMAT0018085	hsa-miR-3663-3p	DUSP2	1844	ENSG00000158050	0.899	predicted	hsa-miR-3663-3p_DUSP2
201	diana_microt	MIMAT0000752	hsa-miR-328-3p	SIX1	6495	ENSG00000126778	0.897	predicted	hsa-miR-328-3p_SIX1
202	diana_microt	MIMAT0000752	hsa-miR-328-3p	SIX1	6495	ENSG00000126778	0.897	predicted	hsa-miR-328-3p_SIX1
203	diana_microt	MIMAT0018107	hsa-miR-3680-3p	ICAM4	3386	ENSG00000105371	0.897	predicted	hsa-miR-3680-3p_ICAM4
204	diana_microt	MIMAT0000439	hsa-miR-153-3p	ICAM4	3386	ENSG00000105371	0.897	predicted	hsa-miR-153-3p_ICAM4
205	diana_microt	MIMAT0018107	hsa-miR-3680-3p	ICAM4	3386	ENSG00000105371	0.897	predicted	hsa-miR-3680-3p_ICAM4
206	diana_microt	MIMAT0000439	hsa-miR-153-3p	ICAM4	3386	ENSG00000105371	0.897	predicted	hsa-miR-153-3p_ICAM4
207	diana_microt	MIMAT0015089	hsa-miR-3202	CX3CL1	6376	ENSG00000006210	0.897	predicted	hsa-miR-3202_CX3CL1
208	diana_microt	MIMAT0015089	hsa-miR-3202	CX3CL1	6376	ENSG00000006210	0.897	predicted	hsa-miR-3202_CX3CL1
209	diana_microt	MIMAT0004553	hsa-miR-7-1-3p	HTR2C	3358	ENSG00000147246	0.896	predicted	hsa-miR-7-1-3p_HTR2C
210	diana_microt	MIMAT0021035	hsa-miR-5007-5p	IL1A	3552	ENSG00000115008	0.895	predicted	hsa-miR-5007-5p_IL1A
211	diana_microt	MIMAT0021035	hsa-miR-5007-5p	IL1A	3552	ENSG00000115008	0.895	predicted	hsa-miR-5007-5p_IL1A
212	diana_microt	MIMAT0019040	hsa-miR-4504	SIX1	6495	ENSG00000126778	0.895	predicted	hsa-miR-4504_SIX1
213	diana_microt	MIMAT0019040	hsa-miR-4504	SIX1	6495	ENSG00000126778	0.895	predicted	hsa-miR-4504_SIX1
214	diana_microt	MIMAT0019983	hsa-miR-4803	HTR2C	3358	ENSG00000147246	0.892	predicted	hsa-miR-4803_HTR2C
215	diana_microt	MIMAT0014977	hsa-miR-3115	IL1A	3552	ENSG00000115008	0.892	predicted	hsa-miR-3115_IL1A
216	diana_microt	MIMAT0004690	hsa-miR-379-3p	IL1A	3552	ENSG00000115008	0.892	predicted	hsa-miR-379-3p_IL1A
217	diana_microt	MIMAT0014977	hsa-miR-3115	IL1A	3552	ENSG00000115008	0.892	predicted	hsa-miR-3115_IL1A
218	diana_microt	MIMAT0004690	hsa-miR-379-3p	IL1A	3552	ENSG00000115008	0.892	predicted	hsa-miR-379-3p_IL1A
219	diana_microt	MIMAT0018950	hsa-miR-4434	HTR2C	3358	ENSG00000147246	0.89	predicted	hsa-miR-4434_HTR2C
220	diana_microt	MIMAT0016858	hsa-miR-4306	SIX1	6495	ENSG00000126778	0.89	predicted	hsa-miR-4306_SIX1
221	diana_microt	MIMAT0016858	hsa-miR-4306	SIX1	6495	ENSG00000126778	0.89	predicted	hsa-miR-4306_SIX1
222	diana_microt	MIMAT0019969	hsa-miR-4795-3p	POF1B	79983	ENSG00000124429	0.89	predicted	hsa-miR-4795-3p_POF1B
223	diana_microt	MIMAT0019969	hsa-miR-4795-3p	POF1B	79983	ENSG00000124429	0.89	predicted	hsa-miR-4795-3p_POF1B
224	diana_microt	MIMAT0019054	hsa-miR-4517	SIX1	6495	ENSG00000126778	0.889	predicted	hsa-miR-4517_SIX1
225	diana_microt	MIMAT0019054	hsa-miR-4517	SIX1	6495	ENSG00000126778	0.889	predicted	hsa-miR-4517_SIX1
226	diana_microt	MIMAT0019980	hsa-miR-4801	HTR2C	3358	ENSG00000147246	0.888	predicted	hsa-miR-4801_HTR2C
227	diana_microt	MIMAT0000455	hsa-miR-185-5p	SIX1	6495	ENSG00000126778	0.888	predicted	hsa-miR-185-5p_SIX1
228	diana_microt	MIMAT0000455	hsa-miR-185-5p	SIX1	6495	ENSG00000126778	0.888	predicted	hsa-miR-185-5p_SIX1

## Sheet: 03.common_mirna
database	mature_mirna_acc	mature_mirna_id	target_symbol	target_entrez	target_ensembl	score	type	miRNA
mirdb	MIMAT0022484	hsa-miR-5692a	SIX1	6495	ENSG00000126778	99.4685988675591	predicted	hsa-miR-5692a_SIX1
mirdb	MIMAT0019003	hsa-miR-4476	HTR2C	3358	ENSG00000147246	99.4494591181065	predicted	hsa-miR-4476_HTR2C
mirdb	MIMAT0019793	hsa-miR-4698	HTR2C	3358	ENSG00000147246	99.3632391960084	predicted	hsa-miR-4698_HTR2C
mirdb	MIMAT0019072	hsa-miR-4533	HTR2C	3358	ENSG00000147246	99.2041	predicted	hsa-miR-4533_HTR2C
mirdb	MIMAT0019072	hsa-miR-4533	HTR2C	3358	ENSG00000147246	99.1114721660872	predicted	hsa-miR-4533_HTR2C
mirdb	MIMAT0019795	hsa-miR-4699-3p	HTR2C	3358	ENSG00000147246	98.6112303421728	predicted	hsa-miR-4699-3p_HTR2C
mirdb	MIMAT0004954	hsa-miR-543	IL1A	3552	ENSG00000115008	98.1040395611016	predicted	hsa-miR-543_IL1A
mirdb	MIMAT0019793	hsa-miR-4698	HTR2C	3358	ENSG00000147246	97.8409263802411	predicted	hsa-miR-4698_HTR2C
mirdb	MIMAT0019003	hsa-miR-4476	HTR2C	3358	ENSG00000147246	97.7283822522994	predicted	hsa-miR-4476_HTR2C
mirdb	MIMAT0018083	hsa-miR-3662	IL1A	3552	ENSG00000115008	97.3168181553053	predicted	hsa-miR-3662_IL1A
mirdb	MIMAT0000716	hsa-miR-302c-5p	HTR2C	3358	ENSG00000147246	97.2591070227016	predicted	hsa-miR-302c-5p_HTR2C
mirdb	MIMAT0000716	hsa-miR-302c-5p	HTR2C	3358	ENSG00000147246	97.0209	predicted	hsa-miR-302c-5p_HTR2C
mirdb	MIMAT0015021	hsa-miR-3148	POF1B	79983	ENSG00000124429	95.9514724559205	predicted	hsa-miR-3148_POF1B
mirdb	MIMAT0019832	hsa-miR-4719	HTR2C	3358	ENSG00000147246	95.8257088345891	predicted	hsa-miR-4719_HTR2C
mirdb	MIMAT0000075	hsa-miR-20a-5p	DUSP2	1844	ENSG00000158050	94.7274	predicted	hsa-miR-20a-5p_DUSP2
mirdb	MIMAT0000680	hsa-miR-106b-5p	DUSP2	1844	ENSG00000158050	94.7274	predicted	hsa-miR-106b-5p_DUSP2
mirdb	MIMAT0019795	hsa-miR-4699-3p	HTR2C	3358	ENSG00000147246	94.0003310191885	predicted	hsa-miR-4699-3p_HTR2C
mirdb	MIMAT0016858	hsa-miR-4306	SIX1	6495	ENSG00000126778	93.8385	predicted	hsa-miR-4306_SIX1
mirdb	MIMAT0000103	hsa-miR-106a-5p	DUSP2	1844	ENSG00000158050	93.0699	predicted	hsa-miR-106a-5p_DUSP2
mirdb	MIMAT0002836	hsa-miR-526b-3p	DUSP2	1844	ENSG00000158050	93.0699	predicted	hsa-miR-526b-3p_DUSP2
mirdb	MIMAT0002853	hsa-miR-519d-3p	DUSP2	1844	ENSG00000158050	93.0699	predicted	hsa-miR-519d-3p_DUSP2
mirdb	MIMAT0002846	hsa-miR-520c-3p	DUSP2	1844	ENSG00000158050	93.0196	predicted	hsa-miR-520c-3p_DUSP2
mirdb	MIMAT0000684	hsa-miR-302a-3p	DUSP2	1844	ENSG00000158050	93.0196	predicted	hsa-miR-302a-3p_DUSP2
mirdb	MIMAT0002834	hsa-miR-520a-3p	DUSP2	1844	ENSG00000158050	93.0196	predicted	hsa-miR-520a-3p_DUSP2
mirdb	MIMAT0002856	hsa-miR-520d-3p	DUSP2	1844	ENSG00000158050	93.0196	predicted	hsa-miR-520d-3p_DUSP2
mirdb	MIMAT0000724	hsa-miR-372-3p	DUSP2	1844	ENSG00000158050	93.0196	predicted	hsa-miR-372-3p_DUSP2
mirdb	MIMAT0002843	hsa-miR-520b-3p	DUSP2	1844	ENSG00000158050	93.0196	predicted	hsa-miR-520b-3p_DUSP2
mirdb	MIMAT0002825	hsa-miR-520e-3p	DUSP2	1844	ENSG00000158050	93.0196	predicted	hsa-miR-520e-3p_DUSP2
mirdb	MIMAT0000753	hsa-miR-342-3p	HTR2C	3358	ENSG00000147246	92.9859663862072	predicted	hsa-miR-342-3p_HTR2C
mirdb	MIMAT0000455	hsa-miR-185-5p	SIX1	6495	ENSG00000126778	92.8602	predicted	hsa-miR-185-5p_SIX1
mirdb	MIMAT0013771	hsa-miR-449c-3p	HTR2C	3358	ENSG00000147246	90.4875	predicted	hsa-miR-449c-3p_HTR2C
mirdb	MIMAT0019054	hsa-miR-4517	SIX1	6495	ENSG00000126778	89.6125	predicted	hsa-miR-4517_SIX1
mirdb	MIMAT0004703	hsa-miR-335-3p	HTR2C	3358	ENSG00000147246	89.5845085217109	predicted	hsa-miR-335-3p_HTR2C
mirdb	MIMAT0019770	hsa-miR-4684-3p	HTR2C	3358	ENSG00000147246	89.3402592243186	predicted	hsa-miR-4684-3p_HTR2C
mirdb	MIMAT0004703	hsa-miR-335-3p	HTR2C	3358	ENSG00000147246	88.4931228551033	predicted	hsa-miR-335-3p_HTR2C
mirdb	MIMAT0004777	hsa-miR-513a-3p	HTR2C	3358	ENSG00000147246	88.1877169698451	predicted	hsa-miR-513a-3p_HTR2C
mirdb	MIMAT0022728	hsa-miR-513c-3p	HTR2C	3358	ENSG00000147246	88.1877169698451	predicted	hsa-miR-513c-3p_HTR2C
mirdb	MIMAT0000429	hsa-miR-137-3p	HTR2C	3358	ENSG00000147246	87.8867	predicted	hsa-miR-137-3p_HTR2C
mirdb	MIMAT0018443	hsa-miR-374c-5p	HTR2C	3358	ENSG00000147246	87.7434	predicted	hsa-miR-374c-5p_HTR2C
mirdb	MIMAT0003331	hsa-miR-655-3p	HTR2C	3358	ENSG00000147246	87.7434	predicted	hsa-miR-655-3p_HTR2C
mirdb	MIMAT0004553	hsa-miR-7-1-3p	HTR2C	3358	ENSG00000147246	87.5222175431415	predicted	hsa-miR-7-1-3p_HTR2C
mirdb	MIMAT0004554	hsa-miR-7-2-3p	HTR2C	3358	ENSG00000147246	87.5222175431415	predicted	hsa-miR-7-2-3p_HTR2C
mirdb	MIMAT0019882	hsa-miR-4747-5p	SIX1	6495	ENSG00000126778	87.4657	predicted	hsa-miR-4747-5p_SIX1
mirdb	MIMAT0000255	hsa-miR-34a-5p	HTR2C	3358	ENSG00000147246	87.0873	predicted	hsa-miR-34a-5p_HTR2C
mirdb	MIMAT0001541	hsa-miR-449a	HTR2C	3358	ENSG00000147246	87.0873	predicted	hsa-miR-449a_HTR2C
mirdb	MIMAT0018443	hsa-miR-374c-5p	HTR2C	3358	ENSG00000147246	86.945	predicted	hsa-miR-374c-5p_HTR2C
mirdb	MIMAT0003331	hsa-miR-655-3p	HTR2C	3358	ENSG00000147246	86.945	predicted	hsa-miR-655-3p_HTR2C
mirdb	MIMAT0000686	hsa-miR-34c-5p	HTR2C	3358	ENSG00000147246	86.7322	predicted	hsa-miR-34c-5p_HTR2C
mirdb	MIMAT0003327	hsa-miR-449b-5p	HTR2C	3358	ENSG00000147246	86.7322	predicted	hsa-miR-449b-5p_HTR2C
mirdb	MIMAT0019027	hsa-miR-4492	CX3CL1	6376	ENSG00000006210	86.5060632827365	predicted	hsa-miR-4492_CX3CL1
mirdb	MIMAT0019033	hsa-miR-4498	CX3CL1	6376	ENSG00000006210	86.1638291211121	predicted	hsa-miR-4498_CX3CL1
mirdb	MIMAT0004553	hsa-miR-7-1-3p	HTR2C	3358	ENSG00000147246	86.0339915240132	predicted	hsa-miR-7-1-3p_HTR2C
mirdb	MIMAT0004554	hsa-miR-7-2-3p	HTR2C	3358	ENSG00000147246	86.0339915240132	predicted	hsa-miR-7-2-3p_HTR2C
mirdb	MIMAT0019770	hsa-miR-4684-3p	HTR2C	3358	ENSG00000147246	85.8473285961816	predicted	hsa-miR-4684-3p_HTR2C
mirdb	MIMAT0018083	hsa-miR-3662	HTR2C	3358	ENSG00000147246	84.632636109732	predicted	hsa-miR-3662_HTR2C
mirdb	MIMAT0002816	hsa-miR-494-3p	POF1B	79983	ENSG00000124429	84.0811	predicted	hsa-miR-494-3p_POF1B
mirdb	MIMAT0019805	hsa-miR-4705	IL1A	3552	ENSG00000115008	83.865	predicted	hsa-miR-4705_IL1A
mirdb	MIMAT0022484	hsa-miR-5692a	HTR2C	3358	ENSG00000147246	83.8067	predicted	hsa-miR-5692a_HTR2C
mirdb	MIMAT0022479	hsa-miR-5688	HTR2C	3358	ENSG00000147246	83.5776532526565	predicted	hsa-miR-5688_HTR2C
mirdb	MIMAT0022484	hsa-miR-5692a	HTR2C	3358	ENSG00000147246	83.2582	predicted	hsa-miR-5692a_HTR2C
mirdb	MIMAT0005956	hsa-miR-1324	HTR2C	3358	ENSG00000147246	83.0732	predicted	hsa-miR-1324_HTR2C
mirdb	MIMAT0020958	hsa-miR-4482-3p	SIX1	6495	ENSG00000126778	83.0369353808829	predicted	hsa-miR-4482-3p_SIX1
mirdb	MIMAT0002817	hsa-miR-495-3p	HTR2C	3358	ENSG00000147246	82.9888	predicted	hsa-miR-495-3p_HTR2C
mirdb	MIMAT0021035	hsa-miR-5007-5p	IL1A	3552	ENSG00000115008	82.2301	predicted	hsa-miR-5007-5p_IL1A
mirdb	MIMAT0002171	hsa-miR-410-3p	DUSP2	1844	ENSG00000158050	81.6733	predicted	hsa-miR-410-3p_DUSP2
mirdb	MIMAT0004777	hsa-miR-513a-3p	HTR2C	3358	ENSG00000147246	81.5440359355061	predicted	hsa-miR-513a-3p_HTR2C
mirdb	MIMAT0022728	hsa-miR-513c-3p	HTR2C	3358	ENSG00000147246	81.5440359355061	predicted	hsa-miR-513c-3p_HTR2C
mirdb	MIMAT0019931	hsa-miR-4775	SIX1	6495	ENSG00000126778	80.6290885705088	predicted	hsa-miR-4775_SIX1
diana_microt	MIMAT0000075	hsa-miR-20a-5p	DUSP2	1844	ENSG00000158050	1	predicted	hsa-miR-20a-5p_DUSP2
diana_microt	MIMAT0000680	hsa-miR-106b-5p	DUSP2	1844	ENSG00000158050	1	predicted	hsa-miR-106b-5p_DUSP2
diana_microt	MIMAT0000716	hsa-miR-302c-5p	HTR2C	3358	ENSG00000147246	1	predicted	hsa-miR-302c-5p_HTR2C
diana_microt	MIMAT0018083	hsa-miR-3662	IL1A	3552	ENSG00000115008	0.997	predicted	hsa-miR-3662_IL1A
diana_microt	MIMAT0018083	hsa-miR-3662	IL1A	3552	ENSG00000115008	0.997	predicted	hsa-miR-3662_IL1A
diana_microt	MIMAT0000103	hsa-miR-106a-5p	DUSP2	1844	ENSG00000158050	0.992	predicted	hsa-miR-106a-5p_DUSP2
diana_microt	MIMAT0002836	hsa-miR-526b-3p	DUSP2	1844	ENSG00000158050	0.991	predicted	hsa-miR-526b-3p_DUSP2
diana_microt	MIMAT0022479	hsa-miR-5688	HTR2C	3358	ENSG00000147246	0.99	predicted	hsa-miR-5688_HTR2C
diana_microt	MIMAT0019027	hsa-miR-4492	CX3CL1	6376	ENSG00000006210	0.989	predicted	hsa-miR-4492_CX3CL1
diana_microt	MIMAT0019027	hsa-miR-4492	CX3CL1	6376	ENSG00000006210	0.989	predicted	hsa-miR-4492_CX3CL1
diana_microt	MIMAT0000724	hsa-miR-372-3p	DUSP2	1844	ENSG00000158050	0.986	predicted	hsa-miR-372-3p_DUSP2
diana_microt	MIMAT0013771	hsa-miR-449c-3p	HTR2C	3358	ENSG00000147246	0.986	predicted	hsa-miR-449c-3p_HTR2C
diana_microt	MIMAT0002816	hsa-miR-494-3p	POF1B	79983	ENSG00000124429	0.986	predicted	hsa-miR-494-3p_POF1B
diana_microt	MIMAT0002816	hsa-miR-494-3p	POF1B	79983	ENSG00000124429	0.986	predicted	hsa-miR-494-3p_POF1B
diana_microt	MIMAT0002817	hsa-miR-495-3p	HTR2C	3358	ENSG00000147246	0.985	predicted	hsa-miR-495-3p_HTR2C
diana_microt	MIMAT0019003	hsa-miR-4476	HTR2C	3358	ENSG00000147246	0.984	predicted	hsa-miR-4476_HTR2C
diana_microt	MIMAT0019793	hsa-miR-4698	HTR2C	3358	ENSG00000147246	0.984	predicted	hsa-miR-4698_HTR2C
diana_microt	MIMAT0020958	hsa-miR-4482-3p	SIX1	6495	ENSG00000126778	0.984	predicted	hsa-miR-4482-3p_SIX1
diana_microt	MIMAT0020958	hsa-miR-4482-3p	SIX1	6495	ENSG00000126778	0.984	predicted	hsa-miR-4482-3p_SIX1
diana_microt	MIMAT0022484	hsa-miR-5692a	HTR2C	3358	ENSG00000147246	0.982	predicted	hsa-miR-5692a_HTR2C
diana_microt	MIMAT0002834	hsa-miR-520a-3p	DUSP2	1844	ENSG00000158050	0.981	predicted	hsa-miR-520a-3p_DUSP2
diana_microt	MIMAT0022728	hsa-miR-513c-3p	HTR2C	3358	ENSG00000147246	0.981	predicted	hsa-miR-513c-3p_HTR2C
diana_microt	MIMAT0019832	hsa-miR-4719	HTR2C	3358	ENSG00000147246	0.98	predicted	hsa-miR-4719_HTR2C
diana_microt	MIMAT0004777	hsa-miR-513a-3p	HTR2C	3358	ENSG00000147246	0.98	predicted	hsa-miR-513a-3p_HTR2C
diana_microt	MIMAT0015021	hsa-miR-3148	POF1B	79983	ENSG00000124429	0.98	predicted	hsa-miR-3148_POF1B
diana_microt	MIMAT0015021	hsa-miR-3148	POF1B	79983	ENSG00000124429	0.98	predicted	hsa-miR-3148_POF1B
diana_microt	MIMAT0000753	hsa-miR-342-3p	HTR2C	3358	ENSG00000147246	0.974	predicted	hsa-miR-342-3p_HTR2C
diana_microt	MIMAT0002825	hsa-miR-520e-3p	DUSP2	1844	ENSG00000158050	0.972	predicted	hsa-miR-520e-3p_DUSP2
diana_microt	MIMAT0004954	hsa-miR-543	IL1A	3552	ENSG00000115008	0.971	predicted	hsa-miR-543_IL1A
diana_microt	MIMAT0004954	hsa-miR-543	IL1A	3552	ENSG00000115008	0.971	predicted	hsa-miR-543_IL1A
diana_microt	MIMAT0019770	hsa-miR-4684-3p	HTR2C	3358	ENSG00000147246	0.97	predicted	hsa-miR-4684-3p_HTR2C
diana_microt	MIMAT0002856	hsa-miR-520d-3p	DUSP2	1844	ENSG00000158050	0.967	predicted	hsa-miR-520d-3p_DUSP2
diana_microt	MIMAT0022484	hsa-miR-5692a	SIX1	6495	ENSG00000126778	0.967	predicted	hsa-miR-5692a_SIX1
diana_microt	MIMAT0022484	hsa-miR-5692a	SIX1	6495	ENSG00000126778	0.967	predicted	hsa-miR-5692a_SIX1
diana_microt	MIMAT0000686	hsa-miR-34c-5p	HTR2C	3358	ENSG00000147246	0.964	predicted	hsa-miR-34c-5p_HTR2C
diana_microt	MIMAT0003327	hsa-miR-449b-5p	HTR2C	3358	ENSG00000147246	0.963	predicted	hsa-miR-449b-5p_HTR2C
diana_microt	MIMAT0004703	hsa-miR-335-3p	HTR2C	3358	ENSG00000147246	0.963	predicted	hsa-miR-335-3p_HTR2C
diana_microt	MIMAT0018083	hsa-miR-3662	HTR2C	3358	ENSG00000147246	0.961	predicted	hsa-miR-3662_HTR2C
diana_microt	MIMAT0002843	hsa-miR-520b-3p	DUSP2	1844	ENSG00000158050	0.958	predicted	hsa-miR-520b-3p_DUSP2
diana_microt	MIMAT0002846	hsa-miR-520c-3p	DUSP2	1844	ENSG00000158050	0.958	predicted	hsa-miR-520c-3p_DUSP2
diana_microt	MIMAT0019805	hsa-miR-4705	IL1A	3552	ENSG00000115008	0.958	predicted	hsa-miR-4705_IL1A
diana_microt	MIMAT0019805	hsa-miR-4705	IL1A	3552	ENSG00000115008	0.958	predicted	hsa-miR-4705_IL1A
diana_microt	MIMAT0001541	hsa-miR-449a	HTR2C	3358	ENSG00000147246	0.954	predicted	hsa-miR-449a_HTR2C
diana_microt	MIMAT0018443	hsa-miR-374c-5p	HTR2C	3358	ENSG00000147246	0.952	predicted	hsa-miR-374c-5p_HTR2C
diana_microt	MIMAT0003331	hsa-miR-655-3p	HTR2C	3358	ENSG00000147246	0.943	predicted	hsa-miR-655-3p_HTR2C
diana_microt	MIMAT0019795	hsa-miR-4699-3p	HTR2C	3358	ENSG00000147246	0.942	predicted	hsa-miR-4699-3p_HTR2C
diana_microt	MIMAT0000255	hsa-miR-34a-5p	HTR2C	3358	ENSG00000147246	0.941	predicted	hsa-miR-34a-5p_HTR2C
diana_microt	MIMAT0002853	hsa-miR-519d-3p	DUSP2	1844	ENSG00000158050	0.939	predicted	hsa-miR-519d-3p_DUSP2
diana_microt	MIMAT0000429	hsa-miR-137-3p	HTR2C	3358	ENSG00000147246	0.937	predicted	hsa-miR-137-3p_HTR2C
diana_microt	MIMAT0019072	hsa-miR-4533	HTR2C	3358	ENSG00000147246	0.935	predicted	hsa-miR-4533_HTR2C
diana_microt	MIMAT0019882	hsa-miR-4747-5p	SIX1	6495	ENSG00000126778	0.932	predicted	hsa-miR-4747-5p_SIX1
diana_microt	MIMAT0019882	hsa-miR-4747-5p	SIX1	6495	ENSG00000126778	0.932	predicted	hsa-miR-4747-5p_SIX1
diana_microt	MIMAT0005956	hsa-miR-1324	HTR2C	3358	ENSG00000147246	0.918	predicted	hsa-miR-1324_HTR2C
diana_microt	MIMAT0019931	hsa-miR-4775	SIX1	6495	ENSG00000126778	0.915	predicted	hsa-miR-4775_SIX1
diana_microt	MIMAT0019931	hsa-miR-4775	SIX1	6495	ENSG00000126778	0.915	predicted	hsa-miR-4775_SIX1
diana_microt	MIMAT0019033	hsa-miR-4498	CX3CL1	6376	ENSG00000006210	0.91	predicted	hsa-miR-4498_CX3CL1
diana_microt	MIMAT0019033	hsa-miR-4498	CX3CL1	6376	ENSG00000006210	0.91	predicted	hsa-miR-4498_CX3CL1
diana_microt	MIMAT0000684	hsa-miR-302a-3p	DUSP2	1844	ENSG00000158050	0.909	predicted	hsa-miR-302a-3p_DUSP2
diana_microt	MIMAT0002171	hsa-miR-410-3p	DUSP2	1844	ENSG00000158050	0.904	predicted	hsa-miR-410-3p_DUSP2
diana_microt	MIMAT0004554	hsa-miR-7-2-3p	HTR2C	3358	ENSG00000147246	0.904	predicted	hsa-miR-7-2-3p_HTR2C
diana_microt	MIMAT0004553	hsa-miR-7-1-3p	HTR2C	3358	ENSG00000147246	0.896	predicted	hsa-miR-7-1-3p_HTR2C
diana_microt	MIMAT0021035	hsa-miR-5007-5p	IL1A	3552	ENSG00000115008	0.895	predicted	hsa-miR-5007-5p_IL1A
diana_microt	MIMAT0021035	hsa-miR-5007-5p	IL1A	3552	ENSG00000115008	0.895	predicted	hsa-miR-5007-5p_IL1A
diana_microt	MIMAT0016858	hsa-miR-4306	SIX1	6495	ENSG00000126778	0.89	predicted	hsa-miR-4306_SIX1
diana_microt	MIMAT0016858	hsa-miR-4306	SIX1	6495	ENSG00000126778	0.89	predicted	hsa-miR-4306_SIX1
diana_microt	MIMAT0019054	hsa-miR-4517	SIX1	6495	ENSG00000126778	0.889	predicted	hsa-miR-4517_SIX1
diana_microt	MIMAT0019054	hsa-miR-4517	SIX1	6495	ENSG00000126778	0.889	predicted	hsa-miR-4517_SIX1
diana_microt	MIMAT0000455	hsa-miR-185-5p	SIX1	6495	ENSG00000126778	0.888	predicted	hsa-miR-185-5p_SIX1
diana_microt	MIMAT0000455	hsa-miR-185-5p	SIX1	6495	ENSG00000126778	0.888	predicted	hsa-miR-185-5p_SIX1
