# Supplementary material for: Integrated multi-omics analysis to investigate the pathogenesis of intrauterine adhesion
Source: Research Square preprint supplement (doi:10.21203/rs.3.rs-7079007/v1), 2025-08-08
Supplement: Supplementary file 13 [file eaba6d5124f3ecc2934daf9c.xlsx]

## Sheet: melt_p_r
X1	X2	cor	pvalue
k__Bacteria.p__Proteobacteria.c__Alphaproteobacteria.o__Acetobacterales.f__Acetobacteraceae.g__Acidisoma	Rocuronium	-0.522526	0.0813516129477136
k__Bacteria.p__Firmicutes.c__Clostridia.o__Clostridiales.f__Clostridiaceae.g__Clostridium_sensu_stricto_1	Rocuronium	-0.374441	0.230460372558648
k__Bacteria.p__Bacteroidota.c__Bacteroidia.o__Chitinophagales.f__Chitinophagaceae.g__Puia	Rocuronium	-0.558338	0.0591963616643501
k__Bacteria.p__Firmicutes.c__Bacilli.o__Exiguobacterales.f__Exiguobacteraceae.g__Exiguobacterium	Rocuronium	-0.553341	0.0620004685739061
k__Bacteria.p__Proteobacteria.c__Alphaproteobacteria.o__Acetobacterales.f__Acetobacteraceae.g__Acidisoma	Pe.18.3.6Z.9Z.12Z..18.1.9Z..	-0.638229	0.02552609414033
k__Bacteria.p__Firmicutes.c__Clostridia.o__Clostridiales.f__Clostridiaceae.g__Clostridium_sensu_stricto_1	Pe.18.3.6Z.9Z.12Z..18.1.9Z..	-0.773845	0.00314168852020359
k__Bacteria.p__Bacteroidota.c__Bacteroidia.o__Chitinophagales.f__Chitinophagaceae.g__Puia	Pe.18.3.6Z.9Z.12Z..18.1.9Z..	-0.174027	0.588558895607686
k__Bacteria.p__Firmicutes.c__Bacilli.o__Exiguobacterales.f__Exiguobacteraceae.g__Exiguobacterium	Pe.18.3.6Z.9Z.12Z..18.1.9Z..	-0.44933	0.142804730941502
k__Bacteria.p__Proteobacteria.c__Alphaproteobacteria.o__Acetobacterales.f__Acetobacteraceae.g__Acidisoma	Perlolyrine	-0.0634496	0.844689572103557
k__Bacteria.p__Firmicutes.c__Clostridia.o__Clostridiales.f__Clostridiaceae.g__Clostridium_sensu_stricto_1	Perlolyrine	-0.104011	0.747690648875545
k__Bacteria.p__Bacteroidota.c__Bacteroidia.o__Chitinophagales.f__Chitinophagaceae.g__Puia	Perlolyrine	-0.224785	0.482431643714935
k__Bacteria.p__Firmicutes.c__Bacilli.o__Exiguobacterales.f__Exiguobacteraceae.g__Exiguobacterium	Perlolyrine	-0.133135	0.679984402489108
k__Bacteria.p__Proteobacteria.c__Alphaproteobacteria.o__Acetobacterales.f__Acetobacteraceae.g__Acidisoma	X1..1.3.Benzodioxol.5.Yl..2..4..2.Chlorophenyl.Piperazin.1.Yl.Ethanol	-0.324713	0.303106688418785
k__Bacteria.p__Firmicutes.c__Clostridia.o__Clostridiales.f__Clostridiaceae.g__Clostridium_sensu_stricto_1	X1..1.3.Benzodioxol.5.Yl..2..4..2.Chlorophenyl.Piperazin.1.Yl.Ethanol	-0.320355	0.310017097347222
k__Bacteria.p__Bacteroidota.c__Bacteroidia.o__Chitinophagales.f__Chitinophagaceae.g__Puia	X1..1.3.Benzodioxol.5.Yl..2..4..2.Chlorophenyl.Piperazin.1.Yl.Ethanol	-0.377059	0.226955832616969
k__Bacteria.p__Firmicutes.c__Bacilli.o__Exiguobacterales.f__Exiguobacteraceae.g__Exiguobacterium	X1..1.3.Benzodioxol.5.Yl..2..4..2.Chlorophenyl.Piperazin.1.Yl.Ethanol	-0.3578	0.253489714573246
k__Bacteria.p__Proteobacteria.c__Alphaproteobacteria.o__Acetobacterales.f__Acetobacteraceae.g__Acidisoma	X5.Phenyl.1.3.Oxazinane.2.4.Dione	0.00373233074830661	0.99081513789721
k__Bacteria.p__Firmicutes.c__Clostridia.o__Clostridiales.f__Clostridiaceae.g__Clostridium_sensu_stricto_1	X5.Phenyl.1.3.Oxazinane.2.4.Dione	0.091530108997031	0.777247345925121
k__Bacteria.p__Bacteroidota.c__Bacteroidia.o__Chitinophagales.f__Chitinophagaceae.g__Puia	X5.Phenyl.1.3.Oxazinane.2.4.Dione	-0.246539	0.439840269979982
k__Bacteria.p__Firmicutes.c__Bacilli.o__Exiguobacterales.f__Exiguobacteraceae.g__Exiguobacterium	X5.Phenyl.1.3.Oxazinane.2.4.Dione	-0.237146	0.458002824045137
k__Bacteria.p__Proteobacteria.c__Alphaproteobacteria.o__Acetobacterales.f__Acetobacteraceae.g__Acidisoma	Bis.2.Hydroxy.1.Naphthyl..Disulfide	-0.451612	0.140537525793845
k__Bacteria.p__Firmicutes.c__Clostridia.o__Clostridiales.f__Clostridiaceae.g__Clostridium_sensu_stricto_1	Bis.2.Hydroxy.1.Naphthyl..Disulfide	-0.416046	0.178556865079958
k__Bacteria.p__Bacteroidota.c__Bacteroidia.o__Chitinophagales.f__Chitinophagaceae.g__Puia	Bis.2.Hydroxy.1.Naphthyl..Disulfide	-0.435068	0.157504015104606
k__Bacteria.p__Firmicutes.c__Bacilli.o__Exiguobacterales.f__Exiguobacteraceae.g__Exiguobacterium	Bis.2.Hydroxy.1.Naphthyl..Disulfide	-0.403565	0.193279539226308
k__Bacteria.p__Proteobacteria.c__Alphaproteobacteria.o__Acetobacterales.f__Acetobacteraceae.g__Acidisoma	X2..2.Chlorophenyl..N..4..4.Phenyl.1.3.Oxazol.2.Yl.Phenyl.Acetamide	0.145560899183958	0.651712523544102
k__Bacteria.p__Firmicutes.c__Clostridia.o__Clostridiales.f__Clostridiaceae.g__Clostridium_sensu_stricto_1	X2..2.Chlorophenyl..N..4..4.Phenyl.1.3.Oxazol.2.Yl.Phenyl.Acetamide	0.108171946996491	0.737905308700649
k__Bacteria.p__Bacteroidota.c__Bacteroidia.o__Chitinophagales.f__Chitinophagaceae.g__Puia	X2..2.Chlorophenyl..N..4..4.Phenyl.1.3.Oxazol.2.Yl.Phenyl.Acetamide	0.253789824334213	0.426060729188269
k__Bacteria.p__Firmicutes.c__Bacilli.o__Exiguobacterales.f__Exiguobacteraceae.g__Exiguobacterium	X2..2.Chlorophenyl..N..4..4.Phenyl.1.3.Oxazol.2.Yl.Phenyl.Acetamide	0.403564571486909	0.193279539226308
k__Bacteria.p__Proteobacteria.c__Alphaproteobacteria.o__Acetobacterales.f__Acetobacteraceae.g__Acidisoma	X1.3.6.Trihydroxy.2..3.Methylbut.2.Enyl.Xanthen.9.One	0.791254118641001	0.00217245087237726
k__Bacteria.p__Firmicutes.c__Clostridia.o__Clostridiales.f__Clostridiaceae.g__Clostridium_sensu_stricto_1	X1.3.6.Trihydroxy.2..3.Methylbut.2.Enyl.Xanthen.9.One	0.715599033976788	0.00887487516766591
k__Bacteria.p__Bacteroidota.c__Bacteroidia.o__Chitinophagales.f__Chitinophagaceae.g__Puia	X1.3.6.Trihydroxy.2..3.Methylbut.2.Enyl.Xanthen.9.One	0.659853543268954	0.01955022353071
k__Bacteria.p__Firmicutes.c__Bacilli.o__Exiguobacterales.f__Exiguobacteraceae.g__Exiguobacterium	X1.3.6.Trihydroxy.2..3.Methylbut.2.Enyl.Xanthen.9.One	0.582464329981106	0.0468899740196575
k__Bacteria.p__Proteobacteria.c__Alphaproteobacteria.o__Acetobacterales.f__Acetobacteraceae.g__Acidisoma	Cascarillin	0.380697736327274	0.222138113177062
k__Bacteria.p__Firmicutes.c__Clostridia.o__Clostridiales.f__Clostridiaceae.g__Clostridium_sensu_stricto_1	Cascarillin	0.47845284248448	0.115609816799103
k__Bacteria.p__Bacteroidota.c__Bacteroidia.o__Chitinophagales.f__Chitinophagaceae.g__Puia	Cascarillin	0.449570545963463	0.142564309465781
k__Bacteria.p__Firmicutes.c__Bacilli.o__Exiguobacterales.f__Exiguobacteraceae.g__Exiguobacterium	Cascarillin	0.545020194482321	0.0668725344279691
k__Bacteria.p__Proteobacteria.c__Alphaproteobacteria.o__Acetobacterales.f__Acetobacteraceae.g__Acidisoma	Pe.20.5.0.0.	0.656890211701963	0.0203015540707249
k__Bacteria.p__Firmicutes.c__Clostridia.o__Clostridiales.f__Clostridiaceae.g__Clostridium_sensu_stricto_1	Pe.20.5.0.0.	0.41188549048664	0.18338400865381
k__Bacteria.p__Bacteroidota.c__Bacteroidia.o__Chitinophagales.f__Chitinophagaceae.g__Puia	Pe.20.5.0.0.	0.601844440563991	0.0384066076686125
k__Bacteria.p__Firmicutes.c__Bacilli.o__Exiguobacterales.f__Exiguobacteraceae.g__Exiguobacterium	Pe.20.5.0.0.	0.582464329981106	0.0468899740196575
